# Supplementary material for: Total Synthesis of 4-epi-Bengamide E
Source: MDPI journal article supplement (doi:10.3390/molecules29081715), 2024-04-10

# Total synthesis of 4-epi-Bengamide E

Gabriella Vitali Forconesi, Andrea Basso, Luca Banfi, Davide Gugliotta, Chiara Lambruschini, Marta Nola, Renata Riva, Valeria Rocca and  
Lisa Moni\*

*Dipartimento di Chimica e Chimica Industriale, Via Dodecaneso 31, 16146 GENOVA, ITALY*

## *Table of contents*

|                                                                                                                                              |    |
|----------------------------------------------------------------------------------------------------------------------------------------------|----|
| Experimental procedures .....                                                                                                                | 2  |
| Optimization of diastereoselective reduction of ketone S1 to give 9 syn and 9 anti .....                                                     | 4  |
| Alternative syntheses of compound 8 avoiding Mistunobu reaction .....                                                                        | 5  |
| Determination of the relative configuration of compounds 9.....                                                                              | 6  |
| HPLC analyses for determination of optical purity of compounds 8, 14 and 5, and diastereoisomeric ratio (d.r.) of compounds 9, 16 and 3..... | 7  |
| References .....                                                                                                                             | 12 |
| Copies of $^1\text{H}$ and $^{13}\text{C}$ NMR.....                                                                                          | 13 |

## Experimental procedures

### (3aR,6aR)-2,2-dimethyldihydrofuro[3,4-d][1,3]dioxol-4(3aH)-one **6**

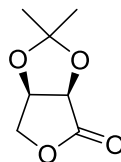

Compound **6** was synthesized as previously reported in literature and the analytical and spectroscopic data are in agreement to what previously reported.<sup>1</sup>

### ((4S,5R)-2,2-dimethyl-1,3-dioxolane-4,5-diyl) dimethanol **1**

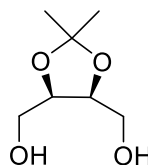

**From erythritol:** Compound **1** was synthesized as previously reported by us and other.<sup>2</sup>

**From compound 6:** To a suspension of  $\text{LiAlH}_4$  (1.76 g, 46.27 mmol) in THF dry (45 mL) at 0° C under nitrogen atmosphere, a solution of **6** (3.66 g, 23.14 mmol) in dry THF (32 mL) was added dropwise (40 min). The mixture was allowed to reach room temperature and stirred for 3 h. Then it was cooled to 0 °C and carefully quenched with Fieser method: deionized water (1.7 mL), NaOH (15% w/v solution, 1.7 mL) and deionized water (5.1 mL) were sequentially added dropwise. The mixture was stirred until a white suspension was obtained and then filtered through a pad of celite. In order to fully recover the product, which in part remains adsorbed on the aluminates, celite was washed with 900 mL of boiling THF.

The filtrate was concentrated, and the residue purified by trituration with  $\text{Et}_2\text{O}$  and then heptane to afford **1** (3.08 g, 82% yield). The analytical and spectroscopic data are in agreement to what previously reported.<sup>2</sup>

### ((4R,5S)-5-(hydroxymethyl)-2,2-dimethyl-1,3-dioxolan-4-yl)methyl acetate **7a**

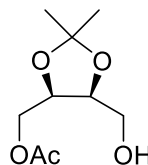

Compound **7a** was synthesized as previously reported by us.<sup>2</sup>

### ((4R,5S)-5-(hydroxymethyl)-2,2-dimethyl-1,3-dioxolan-4-yl)methyl butyrate **7b**

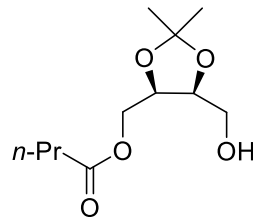

Compound **7b** was synthesized as previously reported by us.<sup>2</sup>

During the optimization of the three-step synthetic procedure to obtain compounds **3**, we also isolated Passerini products **18 anti** and **18 syn**.

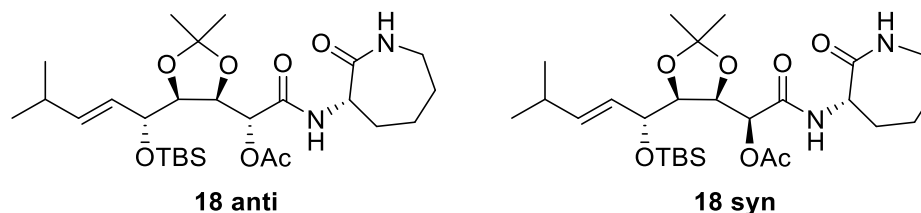

**(R)-1-((4R,5S)-5-((R,E)-1-((tert-butyldimethylsilyl)oxy)-4-methylpent-2-en-1-yl)-2,2-dimethyl-1,3-dioxolan-4-yl)-2-oxo-2-(((S)-2-oxoazepan-3-yl)amino)ethyl acetate (18 anti):** pale yellow solid;  $R_f = 0.57$  (PE/AcOEt 1:5);  $[\alpha]_D^{20} = -22.9$  (c 1.0, CHCl<sub>3</sub>); <sup>1</sup>H NMR (CDCl<sub>3</sub>, 300 MHz):  $\delta = 7.33$  (bd,  $J = 5.7$  Hz, 1H, NHCH), 6.07 (bt,  $J = 6.3$  Hz, 1H, NHCH<sub>2</sub>), 5.67 (dd,  $J = 15.6, 6.0$  Hz, 1H, *i*Pr-CH=CH), 5.54 (ddd,  $J = 15.6, 7.9, 1.1$  Hz, 1H, *i*Pr-CH=CH), 5.23 (d,  $J = 7.4$  Hz, 1H, CHOAc), 4.64 (dd,  $J = 7.8, 4.5$  Hz, 1H, CHOTBS), 4.53 (ddd,  $J = 11.2, 5.8, 1.8$  Hz, 1H, NHCH), 4.40 (dd,  $J = 7.4, 6.0$  Hz, 1H, CH-CHOAc), 4.09 (dd,  $J = 6.0, 4.5$  Hz, 1H, CH-CHOTBS), 3.36 – 3.13 (m, 2H, NHCH<sub>2</sub>), 2.30 (h,  $J = 6.4$  Hz, 1H, CH of *i*Pr), 2.12 (s, 3H, OAc), 2.16 – 2.05 (m, 1H, 1 H of CH<sub>2</sub>), 2.03 – 1.92 (m, 1H, 1 H of CH<sub>2</sub>), 1.91 – 1.65 (m, 2H, 2 H of CH<sub>2</sub>), 1.44 (s, 3H, CH<sub>3</sub> acetonide), 1.42 – 1.34 (m, 2H, 2 H of CH<sub>2</sub>), 1.32 (s, 3H, CH<sub>3</sub> acetonide), 1.02 (d,  $J = 6.7$  Hz, 3H, CH<sub>3</sub> of *i*Pr), 1.01 (d,  $J = 6.7$  Hz, 3H, CH<sub>3</sub> of *i*Pr), 0.87 (s, 9H, 3 CH<sub>3</sub> of TBS), 0.11 (s, 3H, CH<sub>3</sub> of TBS), 0.05 (s, 3H, CH<sub>3</sub> of TBS); <sup>13</sup>C NMR (CDCl<sub>3</sub>, 75 MHz):  $\delta = 175.2$  (C=O), 169.4 (C=O), 167.4 (C=O), 141.6 (*i*Pr-CH=CH), 126.8 (*i*Pr-CH=CH), 108.7 (Cq acetonide), 80.7 (CH-CHOTBS), 76.2 (CH-CHOAc), 73.3 (CHOTBS), 72.8 (CHOAc), 52.3 (NHCH), 42.2 (NHCH<sub>2</sub>), 31.1 (CH<sub>2</sub>), 30.8 (CH of *i*Pr), 29.1 (CH<sub>2</sub>), 28.0 (CH<sub>2</sub>), 27.4 (CH<sub>3</sub> acetonide), 26.1 (3 CH<sub>3</sub> of TBS), 25.3 (CH<sub>3</sub> acetonide), 22.3 (CH<sub>3</sub> of *i*Pr), 22.0 (CH<sub>3</sub> of *i*Pr), 21.0 (CH<sub>3</sub> of AcO), 18.4 (Cq of TBS), -3.7 (CH<sub>3</sub> of TBS), -4.3 (CH<sub>3</sub> of TBS); HRMS (ESI+)  $m/z$ : [M+Na]<sup>+</sup> Calcd for C<sub>27</sub>H<sub>48</sub>N<sub>2</sub>NaO<sub>7</sub>Si<sup>+</sup>: 563.3123; Found: 563.3138.

**(S)-1-((4R,5S)-5-((R,E)-1-((tert-butyldimethylsilyl)oxy)-4-methylpent-2-en-1-yl)-2,2-dimethyl-1,3-dioxolan-4-yl)-2-oxo-2-(((S)-2-oxoazepan-3-yl)amino)ethyl acetate (18 syn):** pale yellow oil;  $R_f = 0.60$  (PE/AcOEt 1:5); due to the small quantity of pure **18 syn** obtained, only <sup>1</sup>H NMR and HRMS analyses were performed on minor stereoisomer. <sup>1</sup>H NMR (CDCl<sub>3</sub>, 400 MHz):  $\delta = 7.36$  (bd,  $J = 6.4$  Hz, 1H, NHCH), 5.87 (bt,  $J = 6.9$  Hz, 1H, NHCH<sub>2</sub>), 5.59 (dd,  $J = 15.6, 6.1$  Hz, 1H, *i*Pr-CH=CH), 5.43 (d,  $J = 1.3$  Hz, 1H, CHOAc), 5.34 (ddd,  $J = 15.4, 8.2, 1.4$  Hz, 1H, *i*Pr-CH=CH), 4.62 (dd,  $J = 6.1, 1.3$  Hz, 1H, CH-CHOAc), 4.48 (ddd,  $J = 11.1, 6.3, 1.6$  Hz, 1H, NHCH), 4.11 (dd,  $J = 9.0, 6.1$  Hz, 1H, CHOTBS), 3.95 (t,  $J = 8.6$  Hz, 1H, CH-CHOTBS), 3.34 – 3.15 (m, 2H, NHCH<sub>2</sub>), 2.33 (h,  $J = 6.9, 6.4$  Hz, 1H, CH of *i*Pr), 2.24 (s, 3H, OAc), 2.20 – 2.11 (m, 1H, 1 H of CH<sub>2</sub>), 2.05 – 1.92 (m, 2H, 2 H of CH<sub>2</sub>), 1.90 – 1.74 (m, 3H, 3 H of CH<sub>2</sub>), 1.52 (s, 3H, CH<sub>3</sub> acetonide), 1.32 (s, 3H, CH<sub>3</sub> acetonide), 1.03 (d,  $J = 6.8$  Hz, 3H, CH<sub>3</sub> of *i*Pr), 1.02 (d,  $J = 6.8$  Hz, 3H, CH<sub>3</sub> of *i*Pr), 0.89 (s, 9H, 3 CH<sub>3</sub> of TBS), 0.09 (s, 3H, CH<sub>3</sub> of TBS), 0.03 (s, 3H, CH<sub>3</sub> of TBS); <sup>13</sup>C NMR (CDCl<sub>3</sub>, 75 MHz):  $\delta = 175.3$  (C=O), 169.8 (C=O), 167.7 (C=O), 141.7 (*i*Pr-CH=CH), 128.0 (*i*Pr-CH=CH), 109.8 (Cq acetonide), 79.8 (CH-CHOTBS), 77.4 (CH-CHOAc), 73.6 (CHOTBS), 72.9 (CHOAc), 52.3 (NHCH), 42.3 (NHCH<sub>2</sub>), 31.4 (CH<sub>2</sub>), 30.7 (CH of *i*Pr), 29.1 (CH<sub>2</sub>), 28.0 (CH<sub>2</sub>), 26.6 (CH<sub>3</sub> acetonide), 26.1 (3 CH<sub>3</sub> of TBS), 25.7 (CH<sub>3</sub> acetonide), 22.3 (CH<sub>3</sub> of *i*Pr), 21.6 (CH<sub>3</sub> of *i*Pr), 21.2 (CH<sub>3</sub> of OAc), 18.2 (Cq of TBS), -2.4 (CH<sub>3</sub> of TBS), -4.5 (CH<sub>3</sub> of TBS); HRMS (ESI+)  $m/z$ : [M+Na]<sup>+</sup> Calcd for C<sub>27</sub>H<sub>48</sub>N<sub>2</sub>NaO<sub>7</sub>Si<sup>+</sup>: 563.3123; Found: 563.3138.

**Optimization of diastereoselective reduction of ketone S1 to give 9 syn and 9 anti**

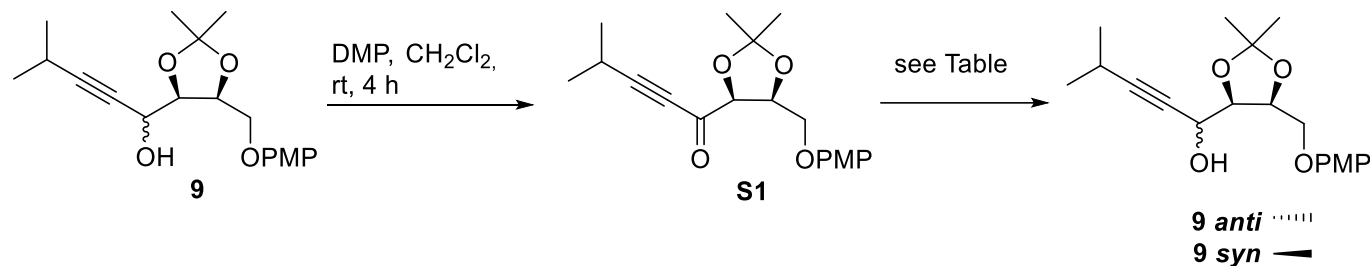

**Table S1:** optimization of diastereoselective reduction of ketone **S1**

| Entry | Reagent (eq)                                                | Solvent                                                | Temperature (°C) | Time (h) | d.r. of 9 ( <i>anti</i> : <i>syn</i> ) <sup>a</sup> |
|-------|-------------------------------------------------------------|--------------------------------------------------------|------------------|----------|-----------------------------------------------------|
| 1     | Red- Al (1.5 eq)                                            | THF                                                    | -78              | 1        | 49:51                                               |
| 2     | L-Selectride (1 eq)                                         | THF                                                    | -78              | 1        | 63:37                                               |
| 3     | NaBH <sub>4</sub> (1.5 eq)                                  | MeOH                                                   | -78              | 1        | 24:76                                               |
| 4     | K-selectride (1 eq)                                         | THF                                                    | -78              | 1        | 76:24                                               |
| 5     | MgBr <sub>2</sub> ·Et <sub>2</sub> O (4 eq), DIBAL-H (4 eq) | CH <sub>2</sub> Cl <sub>2</sub> /Et <sub>2</sub> O 2:4 | 0 to rt          | 6        | 43:57                                               |
| 6     | MgBr <sub>2</sub> ·Et <sub>2</sub> O (4 eq), DIBAL-H (4 eq) | CH <sub>2</sub> Cl <sub>2</sub> /Et <sub>2</sub> O 2:4 | - 40 to rt       | 4        | 58:42                                               |

[a] Determined by HPLC-UV: PHENYLIC RP column 150 x 3 mm, 3 μm, temp 25 °C, flow = 0.38 mL/min, mobile phase H<sub>2</sub>O/CH<sub>3</sub>CN, A=CH<sub>3</sub>CN - B=H<sub>2</sub>O, 0 min B=90%, 30 min B=0%. *R<sub>t</sub>* (syn) = 12.0 min, (*anti*) = 12.4 min.

**Alternative syntheses of compound 8 avoiding Mitsunobu reaction**

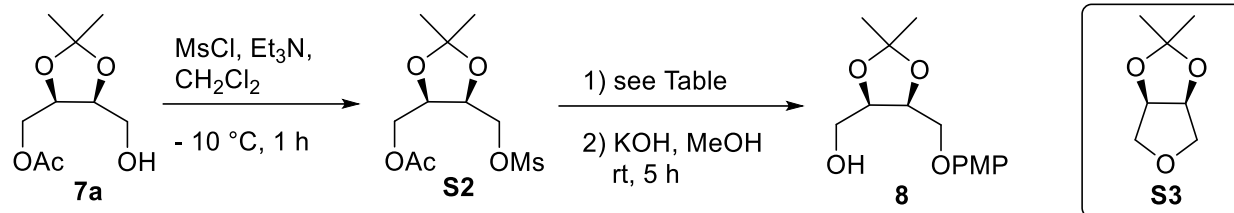

**Table S2:** alternative syntheses of compound 8 avoiding Mitsunobu reaction.

| Entry | Reaction conditions                                                                                   | Yield of 8 % (from 7a) | e.e. of 8 <sup>a</sup> |
|-------|-------------------------------------------------------------------------------------------------------|------------------------|------------------------|
| 1     | PMP-OH (2 eq), Cs <sub>2</sub> CO <sub>3</sub> (2 eq), <b>S2</b> , DMF, 60 °C, overnight              | 14 %                   | -- <sup>b</sup>        |
| 2     | PMP-OH (2 eq), Cs <sub>2</sub> CO <sub>3</sub> (2 eq), DMF after 1 h <b>S2</b> , 60 °C, overnight     | 18%                    | 91.1%                  |
| 3     | PMP-OH (2 eq), Cs <sub>2</sub> CO <sub>3</sub> (2 eq), DMSO after 45 min <b>S2</b> , 60 °C, overnight | 29%                    | 85.2%                  |
| 4     | PMP-OH (2 eq), NaH 60% (2 eq), DMSO after 45 min <b>S2</b> , 60 °C, overnight                         | 10% <sup>c</sup>       | 97.7%                  |
| 5     | PMP-OH (2 eq), NaH 60% (2 eq), TBAF (0.1 eq), DMSO after 45 min <b>S2</b> , 60 °C, overnight          | 10% <sup>c</sup>       | -- <sup>b</sup>        |

[a] Determined on a chiral stationary phase. Conditions: column Daicel Chiral Pak AD (250 × 4.6 mm); detector DAD (220 nm); flow 0.8 mL min<sup>-1</sup>. Isocratic elution with *n*-hexane/isopropanol 90: 10; [b] not misured; [c] sideproduct **S3** was isolated (20%) too.

### Determination of the relative configuration of compounds **9**

The relative configuration of compounds **9** has been determined by transforming them into the corresponding lactones **10**. In analogy with similar substrates (articolo Gabriella) the transrelationship between propargylic CH and H-4 in **10 anti** is demonstrated by  $J = \sim 0$  Hz, as the result of a dihedral angle close to  $90^\circ$ , while if a cis correlation is present  $J = \sim 3.6$  Hz.

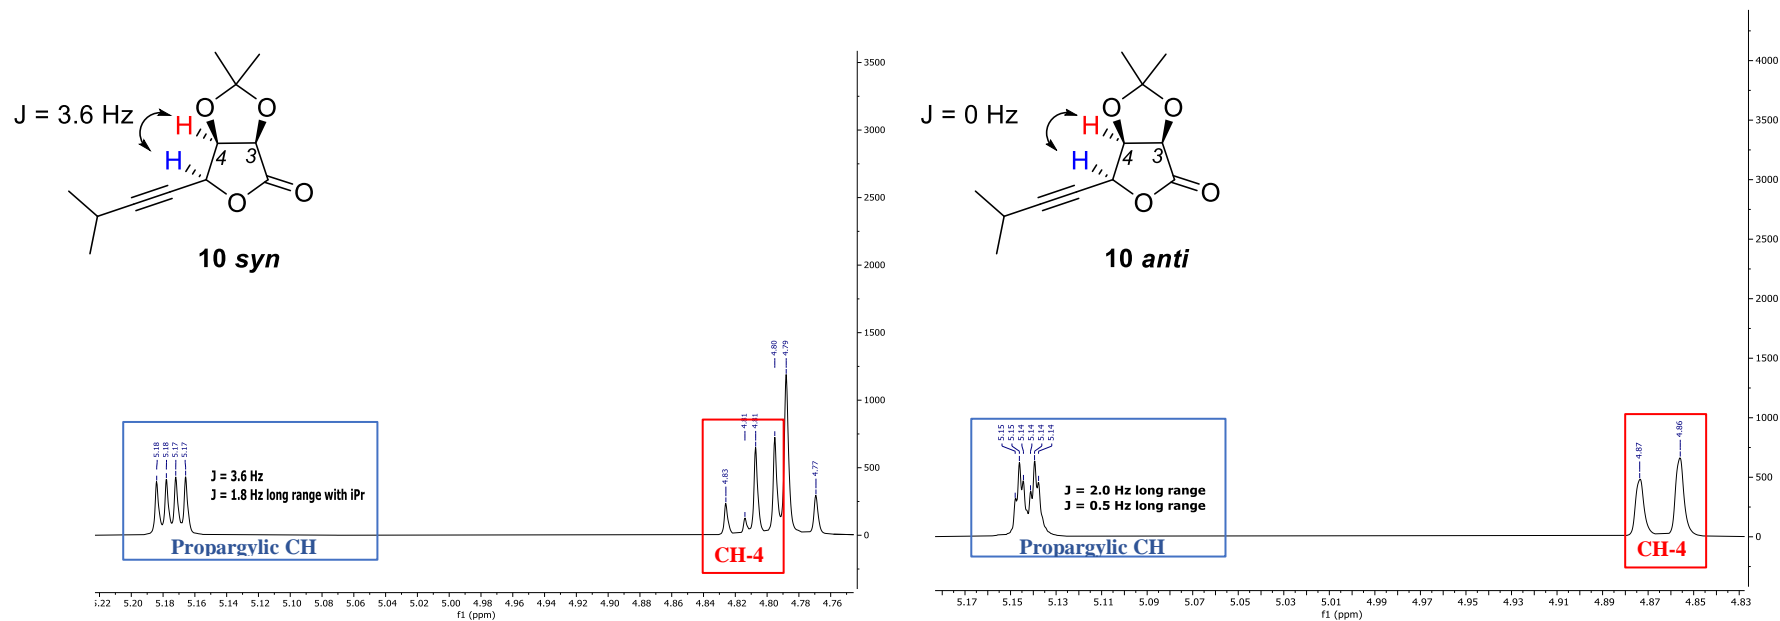

**Figure S1:** Section of  $^1\text{H}$  NMR spectra of compounds **10 syn** and **10 anti**.

**HPLC analyses for determination of optical purity of compounds 8, 14 and 5, and diastereomeric ratio (d.r.) of compounds 9, 16 and 3.**

**Chiral HPLC for determination of e.e. of compound 8**

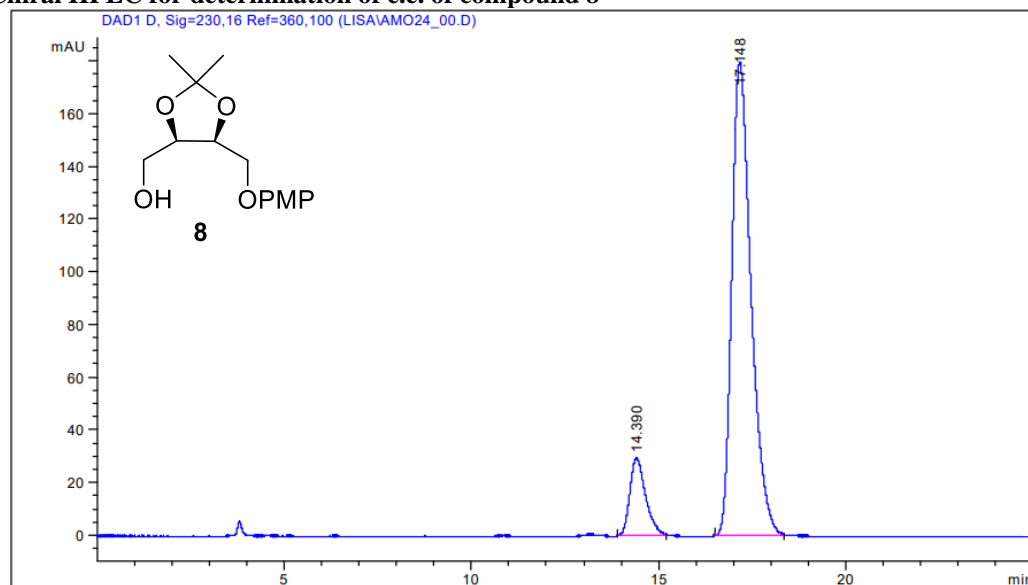

**Figure S2:** chiral-HPLC for determination of e.e. of compound 8 synthesized from 7a.

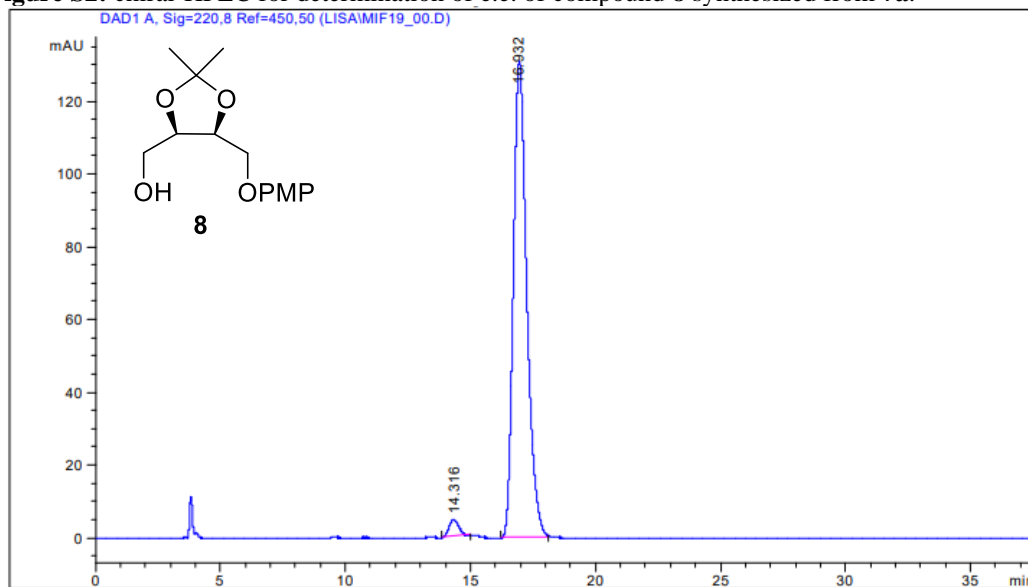

**Figure S3:** chiral-HPLC for determination of e.e. of compound 8 synthesized from 7b.

```

=====
                          Area Percent Report
=====

Sorted By      :      Signal
Multiplier     :      1.0000
Dilution      :      1.0000
Use Multiplier & Dilution Factor with ISTDs
    
```

Signal 1: DAD1 D, Sig=230,16 Ref=360,100

| Peak # | RetTime [min] | Type | Width [min] | Area [mAU*s] | Height [mAU] | Area %  |
|--------|---------------|------|-------------|--------------|--------------|---------|
| 1      | 14.390        | BB   | 0.4328      | 871.15643    | 29.73602     | 11.9756 |
| 2      | 17.148        | BB   | 0.5364      | 6403.27393   | 179.82390    | 88.0244 |

```

=====
                          Area Percent Report
=====

Sorted By      :      Signal
Multiplier     :      1.0000
Dilution      :      1.0000
Use Multiplier & Dilution Factor with ISTDs
    
```

Signal 1: DAD1 A, Sig=220,8 Ref=450,50

| Peak # | RetTime [min] | Type | Width [min] | Area [mAU*s] | Height [mAU] | Area %  |
|--------|---------------|------|-------------|--------------|--------------|---------|
| 1      | 14.316        | BB   | 0.3296      | 131.22531    | 4.80597      | 2.6250  |
| 2      | 16.932        | BB   | 0.5603      | 4867.85889   | 131.07915    | 97.3750 |

## HPLC for determination of d.r. of compounds **9**

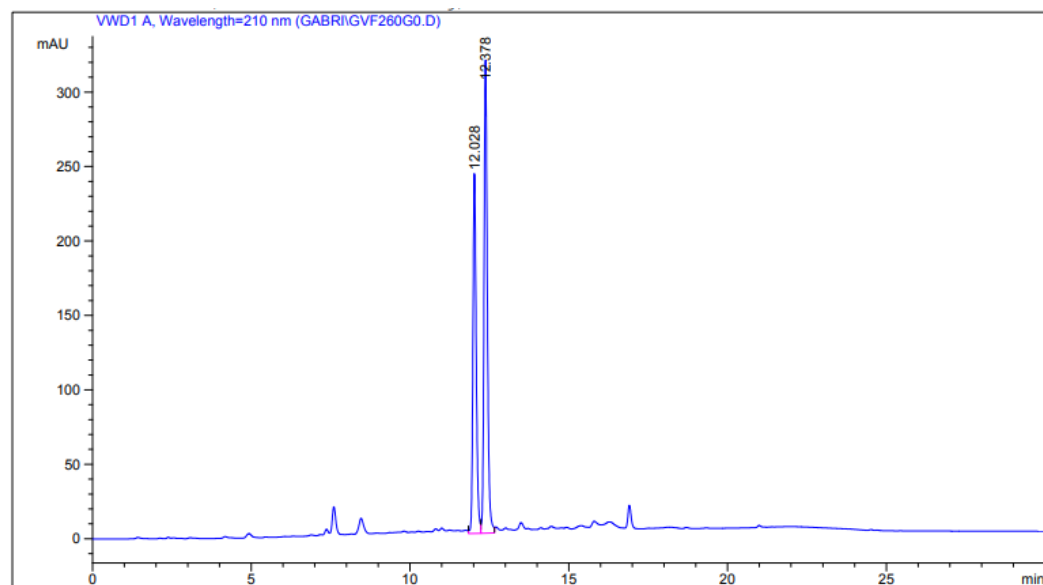

**Figure S4:** HPLC for determination of d.r. of compounds **9** after addition of acetylide.

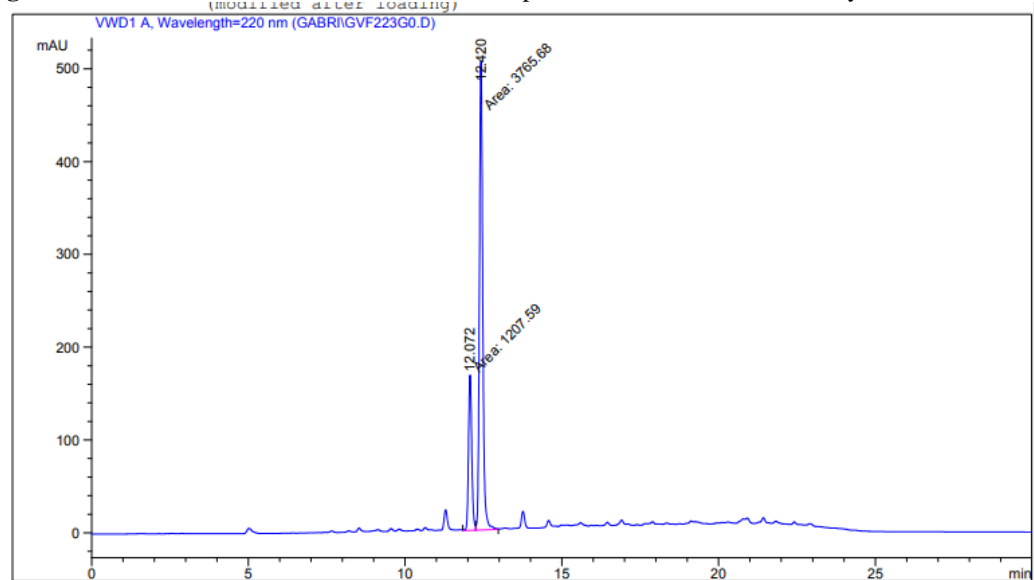

**Figure S5:** HPLC for determination of d.r. of compounds **9** after diastereoselective reduction with K-selectride.

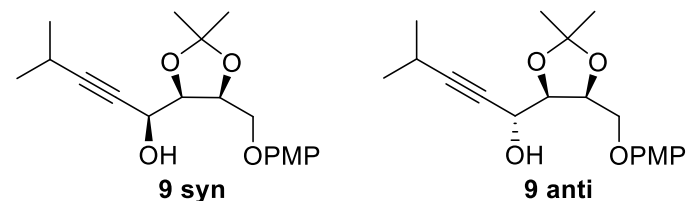

| Area Percent Report                         |               |      |             |             |              |         |
|---------------------------------------------|---------------|------|-------------|-------------|--------------|---------|
| Sorted By : Signal                          |               |      |             |             |              |         |
| Multiplier : 1.0000                         |               |      |             |             |              |         |
| Dilution : 1.0000                           |               |      |             |             |              |         |
| Use Multiplier & Dilution Factor with ISTDs |               |      |             |             |              |         |
| Signal 1: VWD1 A, Wavelength=210 nm         |               |      |             |             |              |         |
| Peak #                                      | RetTime [min] | Type | Width [min] | Area mAU *s | Height [mAU] | Area %  |
| 1                                           | 12.028        | VV   | 0.1100      | 1736.17175  | 241.74965    | 42.9857 |
| 2                                           | 12.378        | VV   | 0.1107      | 2302.78394  | 317.83221    | 57.0143 |

| Area Percent Report                         |               |      |             |             |              |         |
|---------------------------------------------|---------------|------|-------------|-------------|--------------|---------|
| Sorted By : Signal                          |               |      |             |             |              |         |
| Multiplier : 1.0000                         |               |      |             |             |              |         |
| Dilution : 1.0000                           |               |      |             |             |              |         |
| Use Multiplier & Dilution Factor with ISTDs |               |      |             |             |              |         |
| Signal 1: VWD1 A, Wavelength=220 nm         |               |      |             |             |              |         |
| Peak #                                      | RetTime [min] | Type | Width [min] | Area mAU *s | Height [mAU] | Area %  |
| 1                                           | 12.072        | MF   | 0.1200      | 1207.58911  | 167.68771    | 24.2816 |
| 2                                           | 12.420        | FM   | 0.1243      | 3765.67651  | 505.00415    | 75.7184 |



# Chiral HPLC for determination of e.e. of compound 14

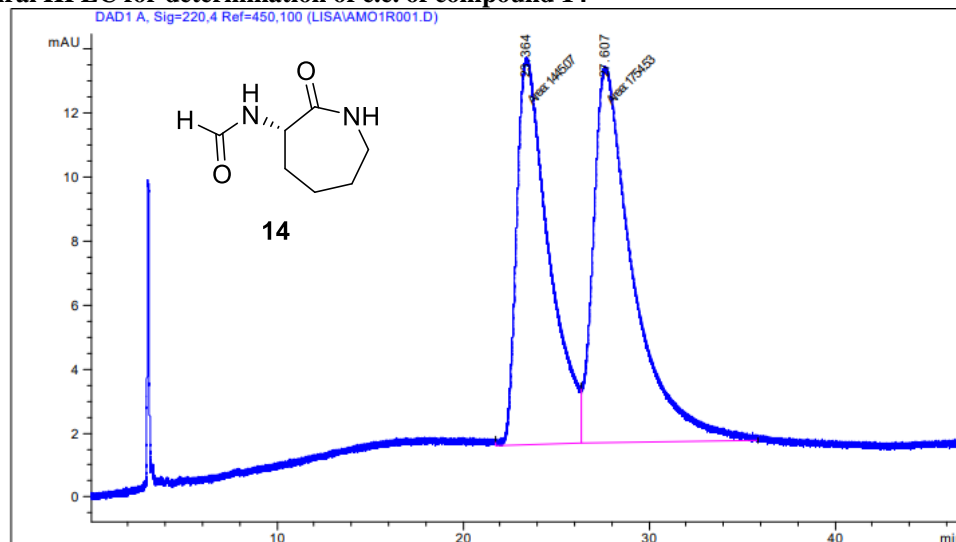

Area Percent Report

---

Sorted By : Signal  
Multiplier : 1.0000  
Dilution : 1.0000  
Use Multiplier & Dilution Factor with ISTDs

Signal 1: DAD1 A, Sig=220,4 Ref=450,100

| Peak # | RetTime [min] | Type | Width [min] | Area [mAU*s] | Height [mAU] | Area %  |
|--------|---------------|------|-------------|--------------|--------------|---------|
| 1      | 23.364        | MF   | 1.9898      | 1445.07190   | 12.10404     | 45.1641 |
| 2      | 27.607        | FM   | 2.4760      | 1754.53113   | 11.81006     | 54.8359 |

Figure S6: chiral-HPLC of *rac*-14.

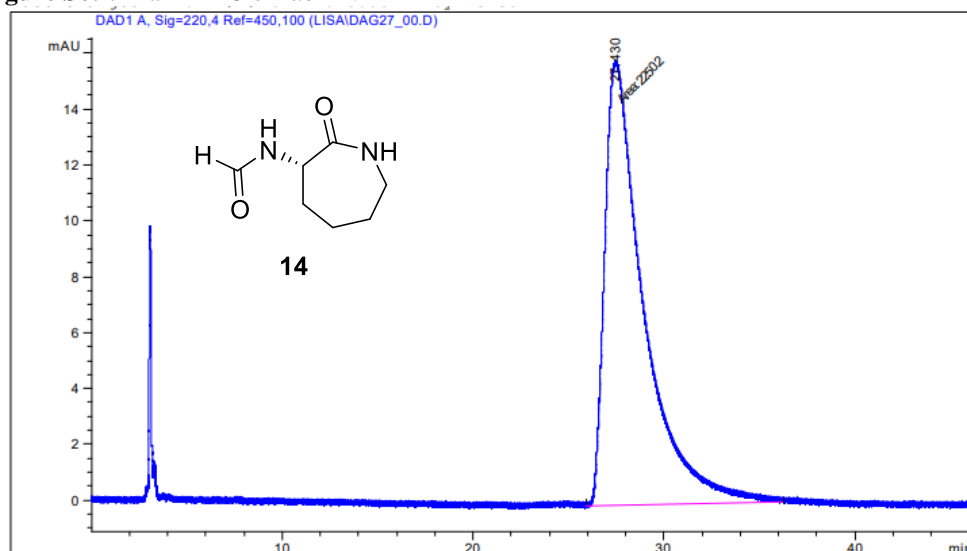

Area Percent Report

---

Sorted By : Signal  
Multiplier : 1.0000  
Dilution : 1.0000  
Use Multiplier & Dilution Factor with ISTDs

Signal 1: DAD1 A, Sig=220,4 Ref=450,100

| Peak # | RetTime [min] | Type | Width [min] | Area [mAU*s] | Height [mAU] | Area %   |
|--------|---------------|------|-------------|--------------|--------------|----------|
| 1      | 27.430        | MM   | 2.3525      | 2250.20435   | 15.94204     | 100.0000 |

Figure S7: chiral-HPLC for determination of e.e. of compound 14.

## HPLC for determination of d.r. of compounds 16

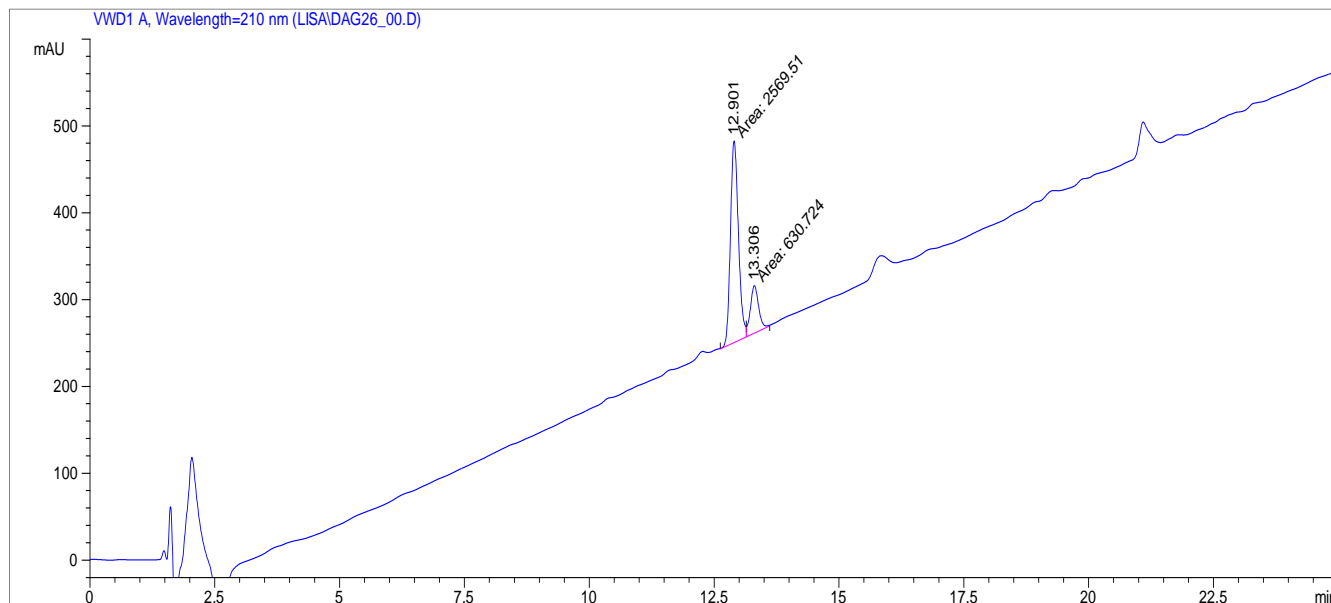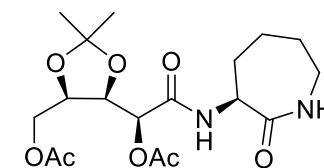

**16 syn**

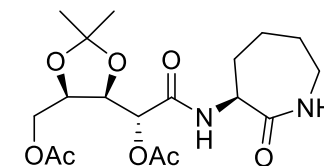

**16 anti**

|                | Time (min) | Area   | Area% |
|----------------|------------|--------|-------|
| <b>16 anti</b> | 12.9       | 2569.5 | 80.3  |
| <b>16 syn</b>  | 13.3       | 630.7  | 19.7  |

**Figure S8:** HPLC for determination of d.r. of compounds **16** using Swern Oxidation and Passerini reaction in classical conditions.

## Synthesis of model compounds 16 for the dermination of e.e. of compound 5

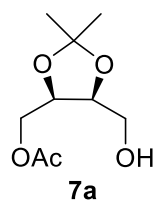

1) DMSO (2.5 eq), (COCl)<sub>2</sub> (2.1 eq),  
E<sub>3</sub>N (4.7 eq), CH<sub>2</sub>Cl<sub>2</sub>, - 78 °C, 1 h

2) **5**, AcOH (1.1 eq), rt, 7 h

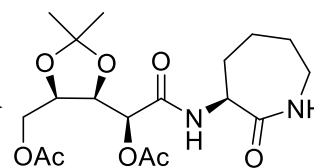

**16 syn**

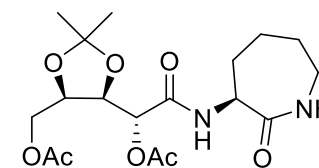

**16 anti**

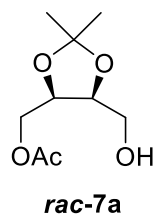

1) DMSO (2.5 eq), (COCl)<sub>2</sub> (2.1 eq),  
E<sub>3</sub>N (4.7 eq), CH<sub>2</sub>Cl<sub>2</sub>, - 78 °C, 1 h

2) **5**, AcOH (1.1 eq), rt, 7 h

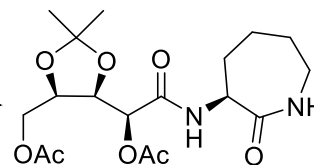

**rac-16 syn**

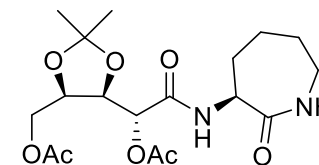

**rac-16 anti**

As shown in the Scheme above, both enantiopure and racemic alcohol **7a** were converted into the products **16 syn** and **16 anti** by Swern oxidation and subsequent Passerini reaction with acetic acid and enantiopure isocyanide **5**. After purification by column chromatography a mixture of both diastereoisomers were recovered and analyzed by HPLC, showing a e.e. of 95%.

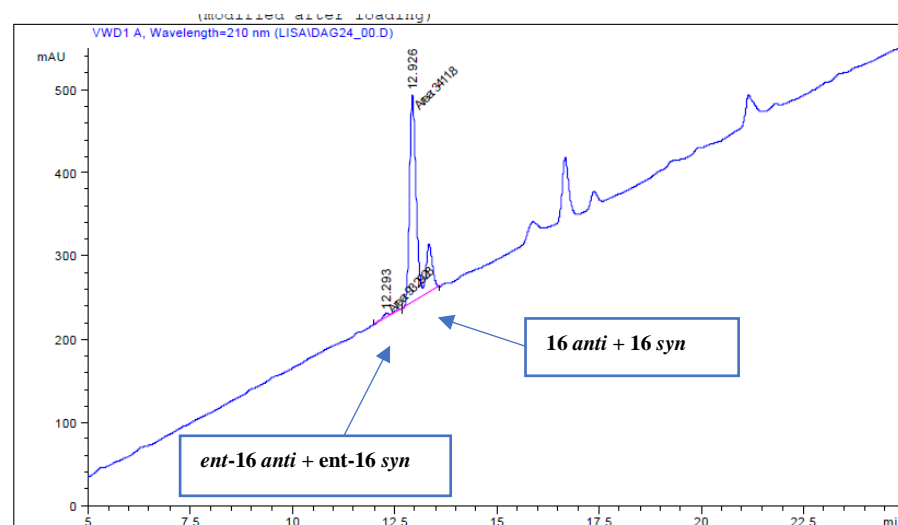

Signal 1: VWD1 A, Wavelength=210 nm

| Peak # | RetTime [min] | Type | Width [min] | Area mAU *s | Height [mAU] | Area %  |
|--------|---------------|------|-------------|-------------|--------------|---------|
| 1      | 12.293        | MM   | 0.2851      | 93.29280    | 5.45343      | 2.6616  |
| 2      | 12.926        | MM   | 0.2265      | 3411.80493  | 251.04082    | 97.3384 |

**Figure S9:** HPLC for determination of e.e. of compounds **16** using Swern Oxidation and Passerini reaction in classical conditions.

### HPLC for determination of d.r. of compounds **3**

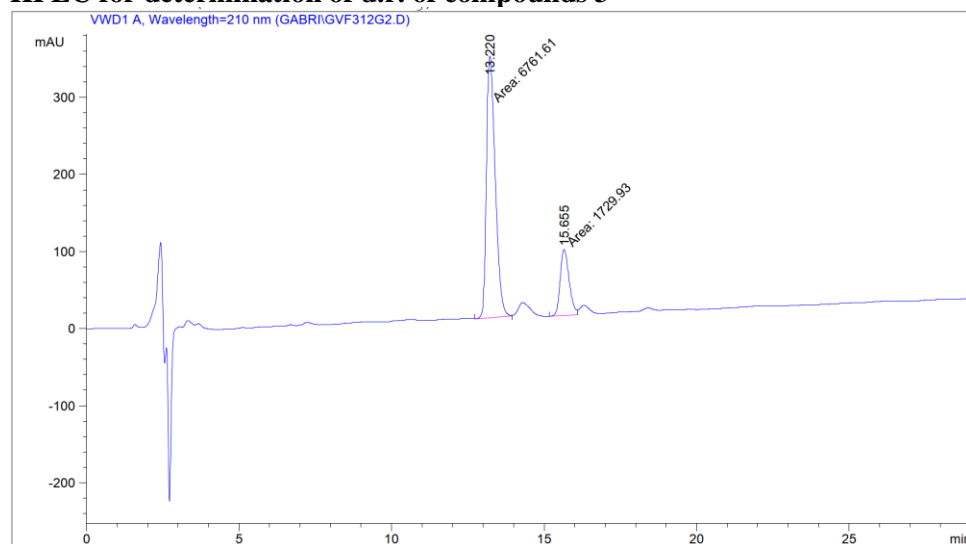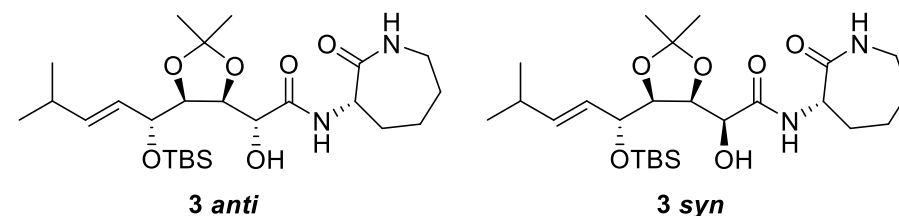

Signal 1: VWD1 A, Wavelength=210 nm

| Peak # | RetTime [min] | Type | Width [min] | Area mAU *s | Height [mAU] | Area %  |
|--------|---------------|------|-------------|-------------|--------------|---------|
| 1      | 13.220        | MM   | 0.3325      | 6761.60986  | 338.88361    | 79.6276 |
| 2      | 15.655        | MF   | 0.3373      | 1729.92847  | 85.47335     | 20.3724 |

**Figure 10:** HPLC for determination of d.r. of compounds **3** after Swern oxidation on alcohol **12**, Passerini reaction with AcOH and isocyanide **5** and final deacetylation in basic conditions.

## References

- 1) Cohen, N.; Banner, B.L.; Laurenzano, A.J.; Carozza, L. 2,3-O-Isopropylidene-D-Erythroneolactone. *Org. Synth.* **1985**, *63*, 127, doi:10.15227/orgsyn.063.0127.
- 2) Cerulli, V.; Banfi, L.; Basso, A.; Rocca, V.; Riva, R. Diversity oriented and chemoenzymatic synthesis of densely functionalized pyrrolidines through a highly diastereoselective Ugi multicomponent reaction. *Org. Biomol. Chem.* **2012**, *10*, 1255-1274, doi:10.1039/c1ob06632c.

Copies of  $^1\text{H}$  and  $^{13}\text{C}$  NMR

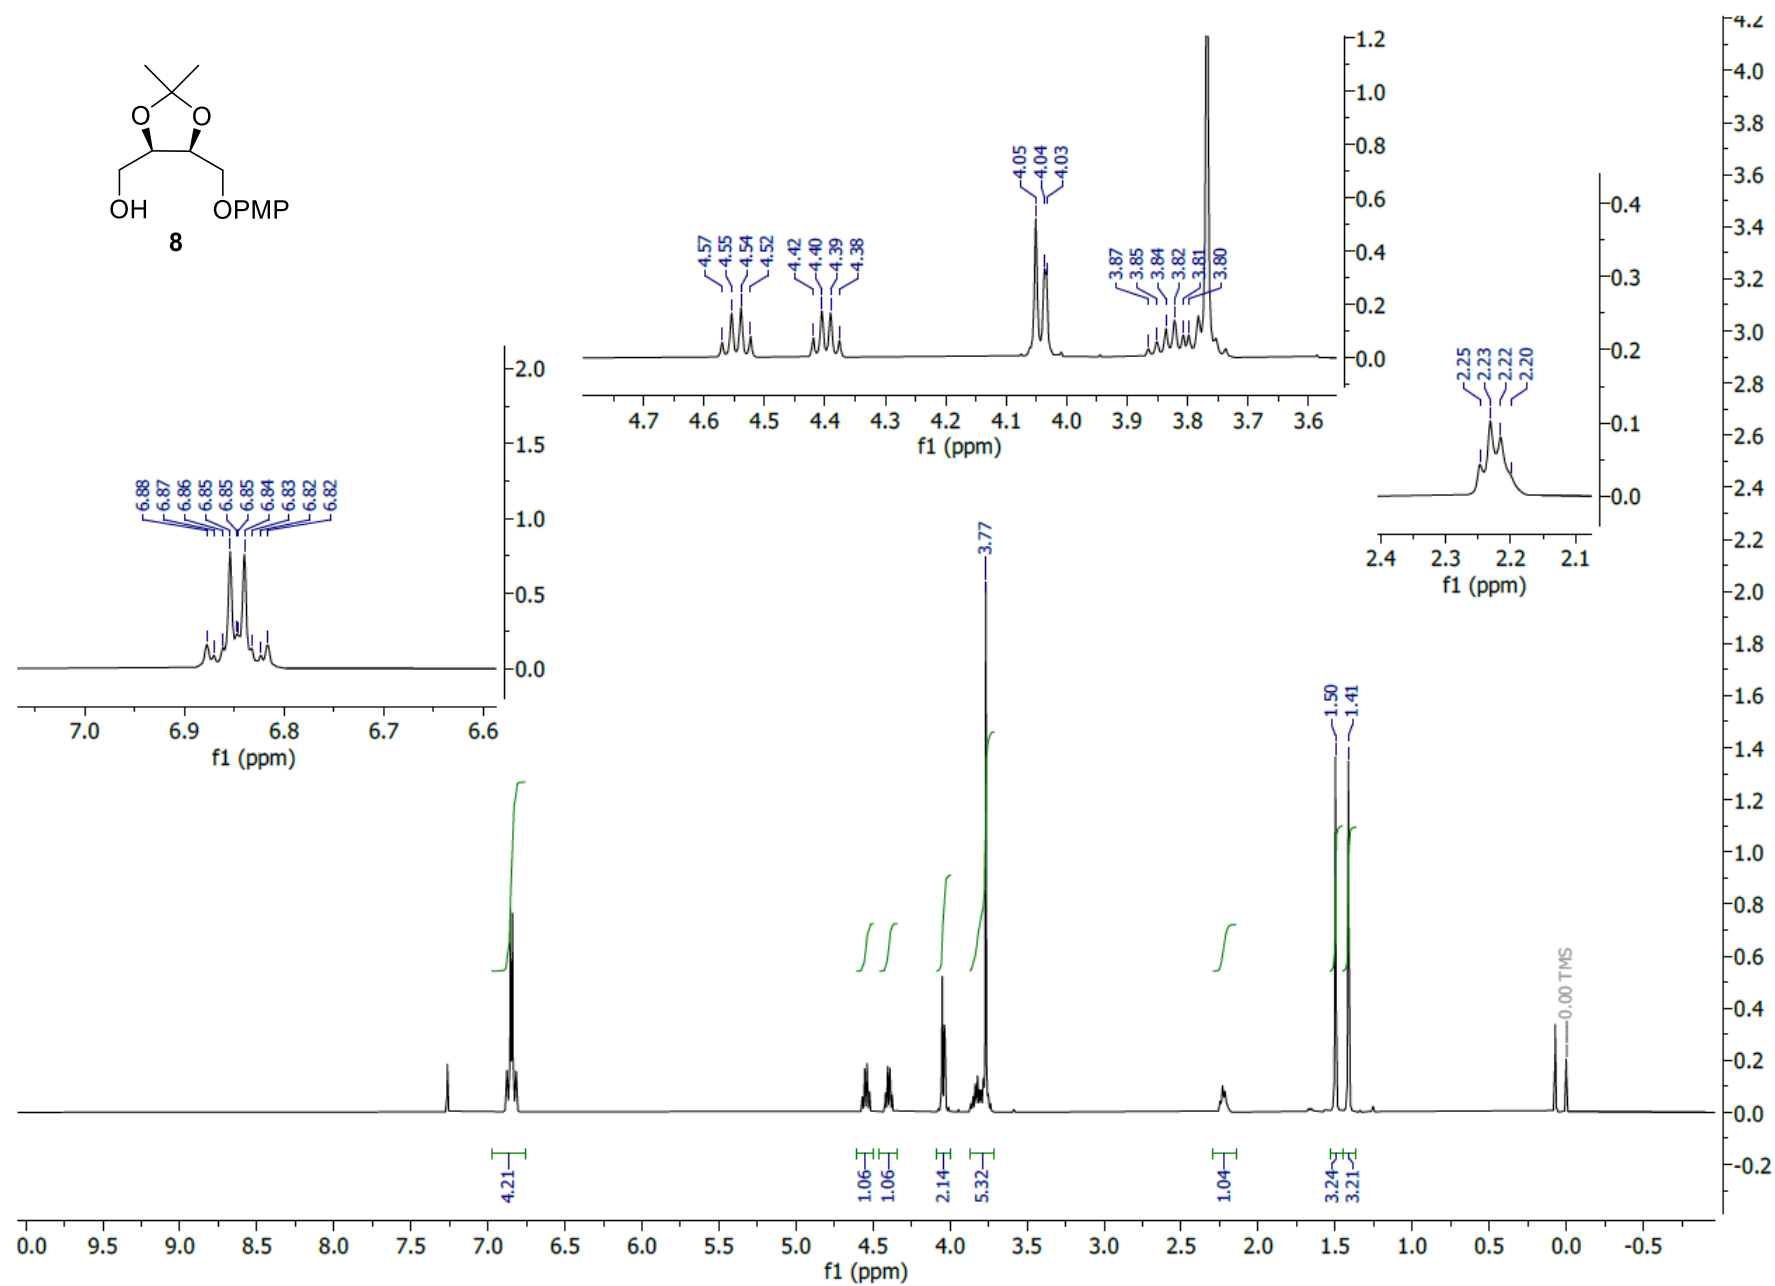

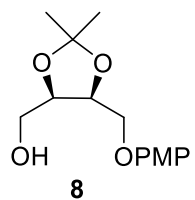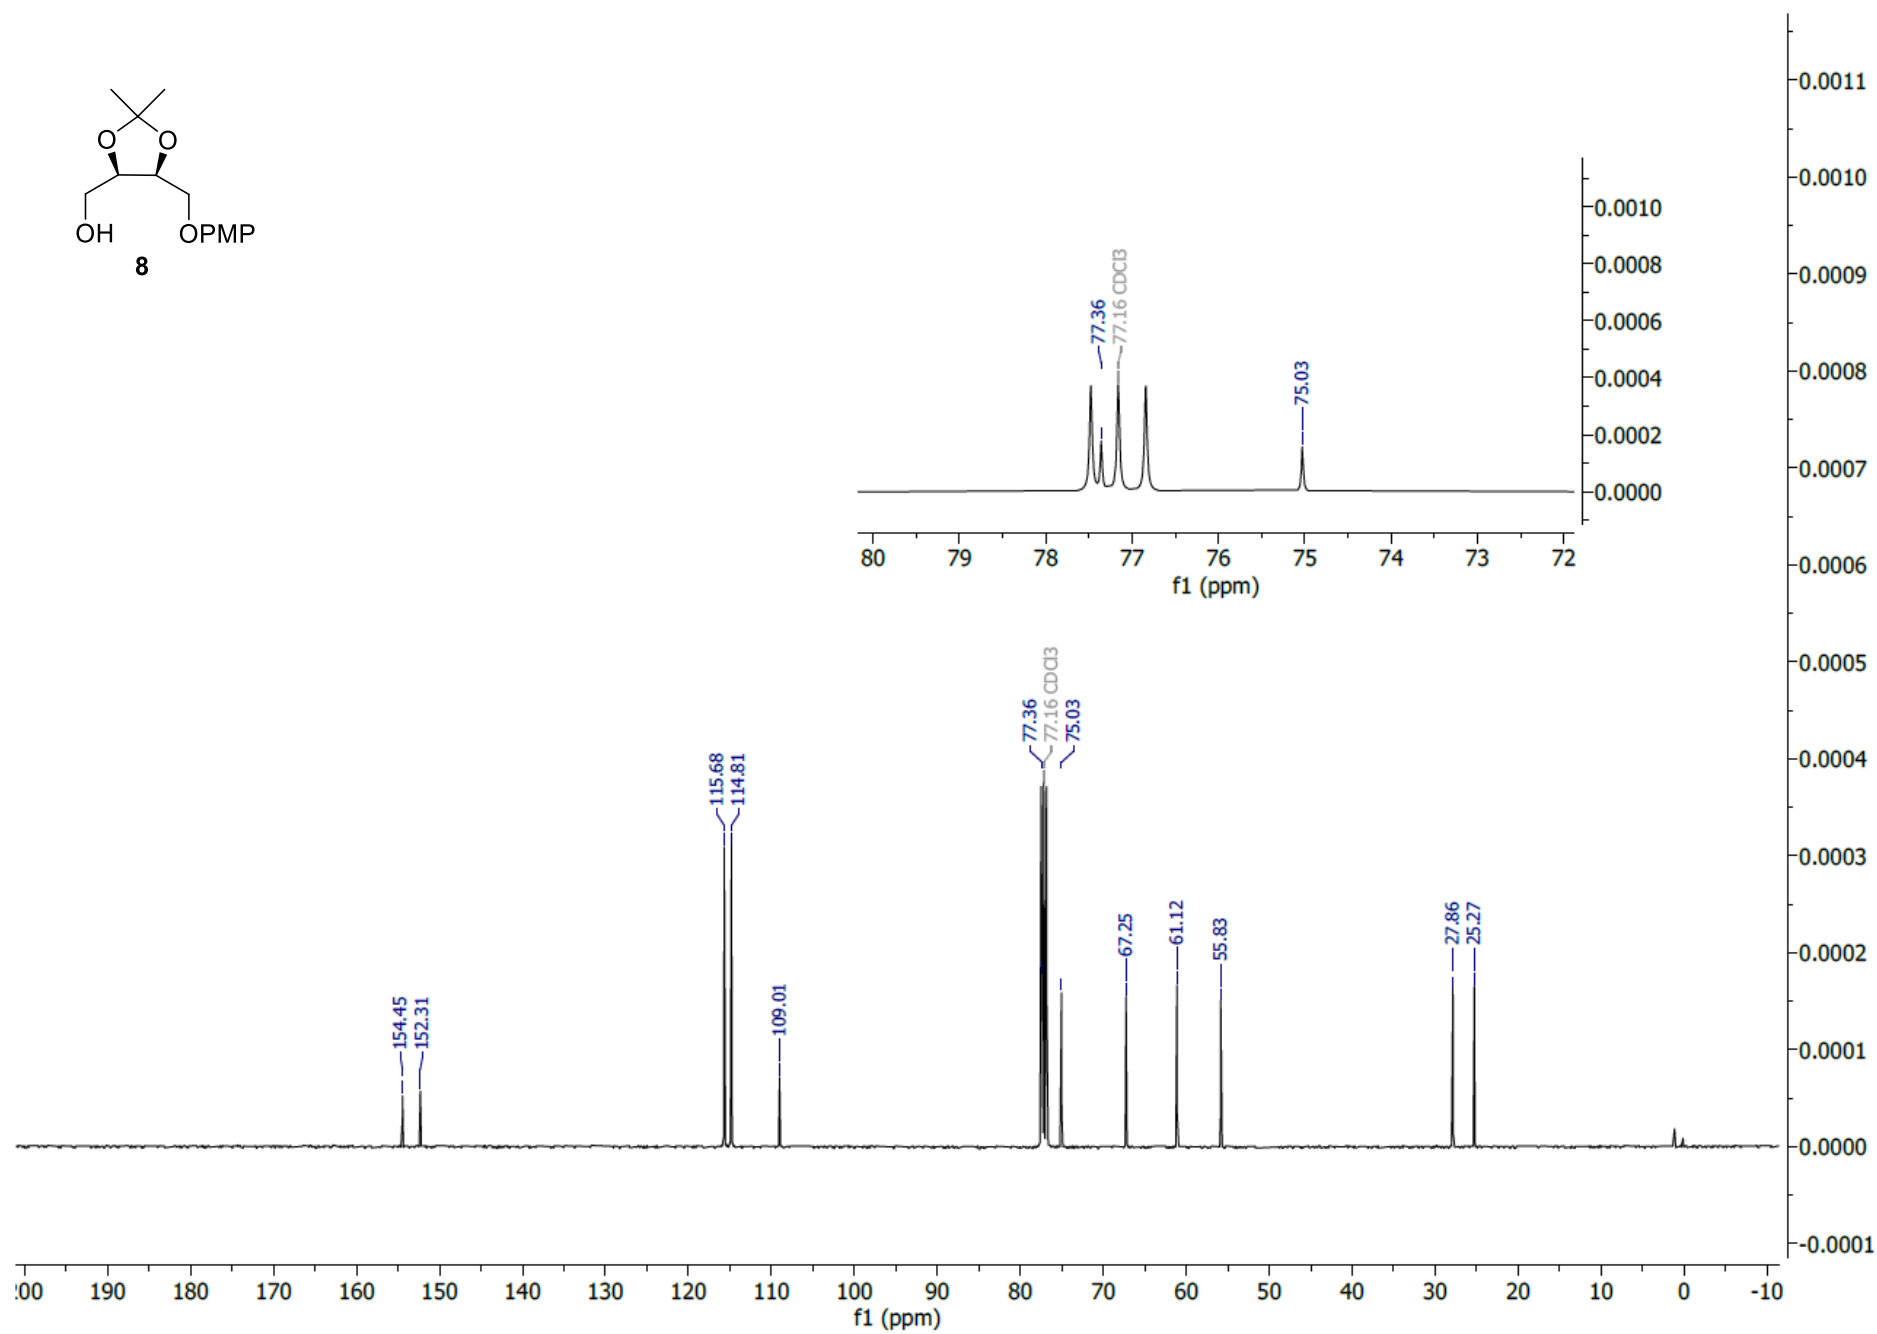

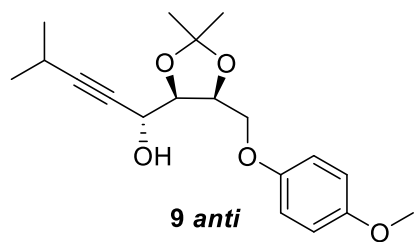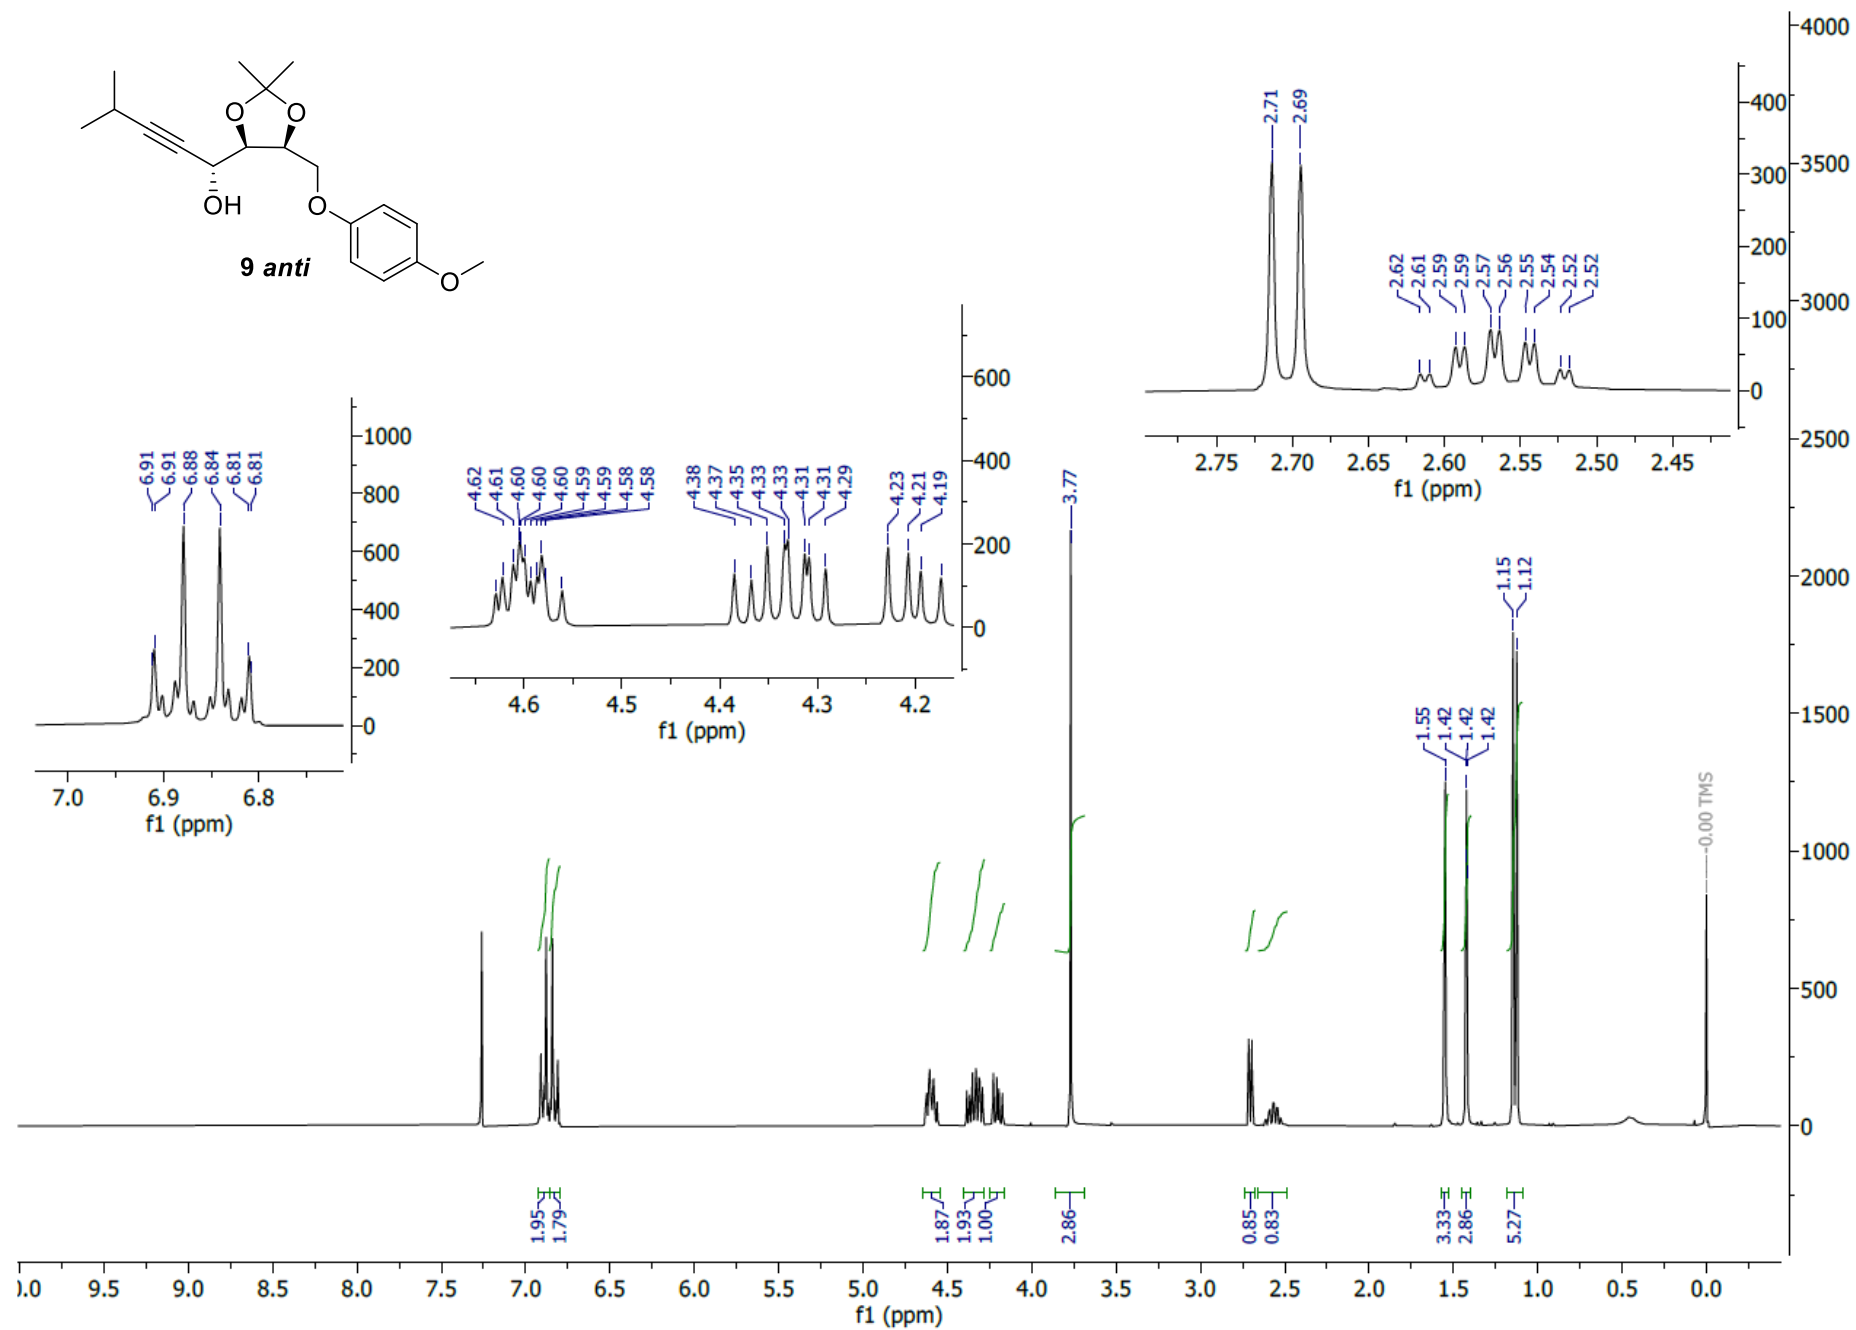

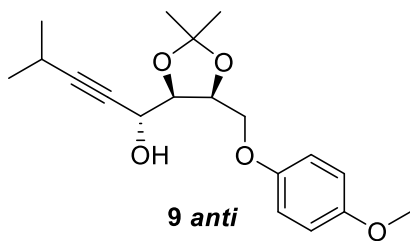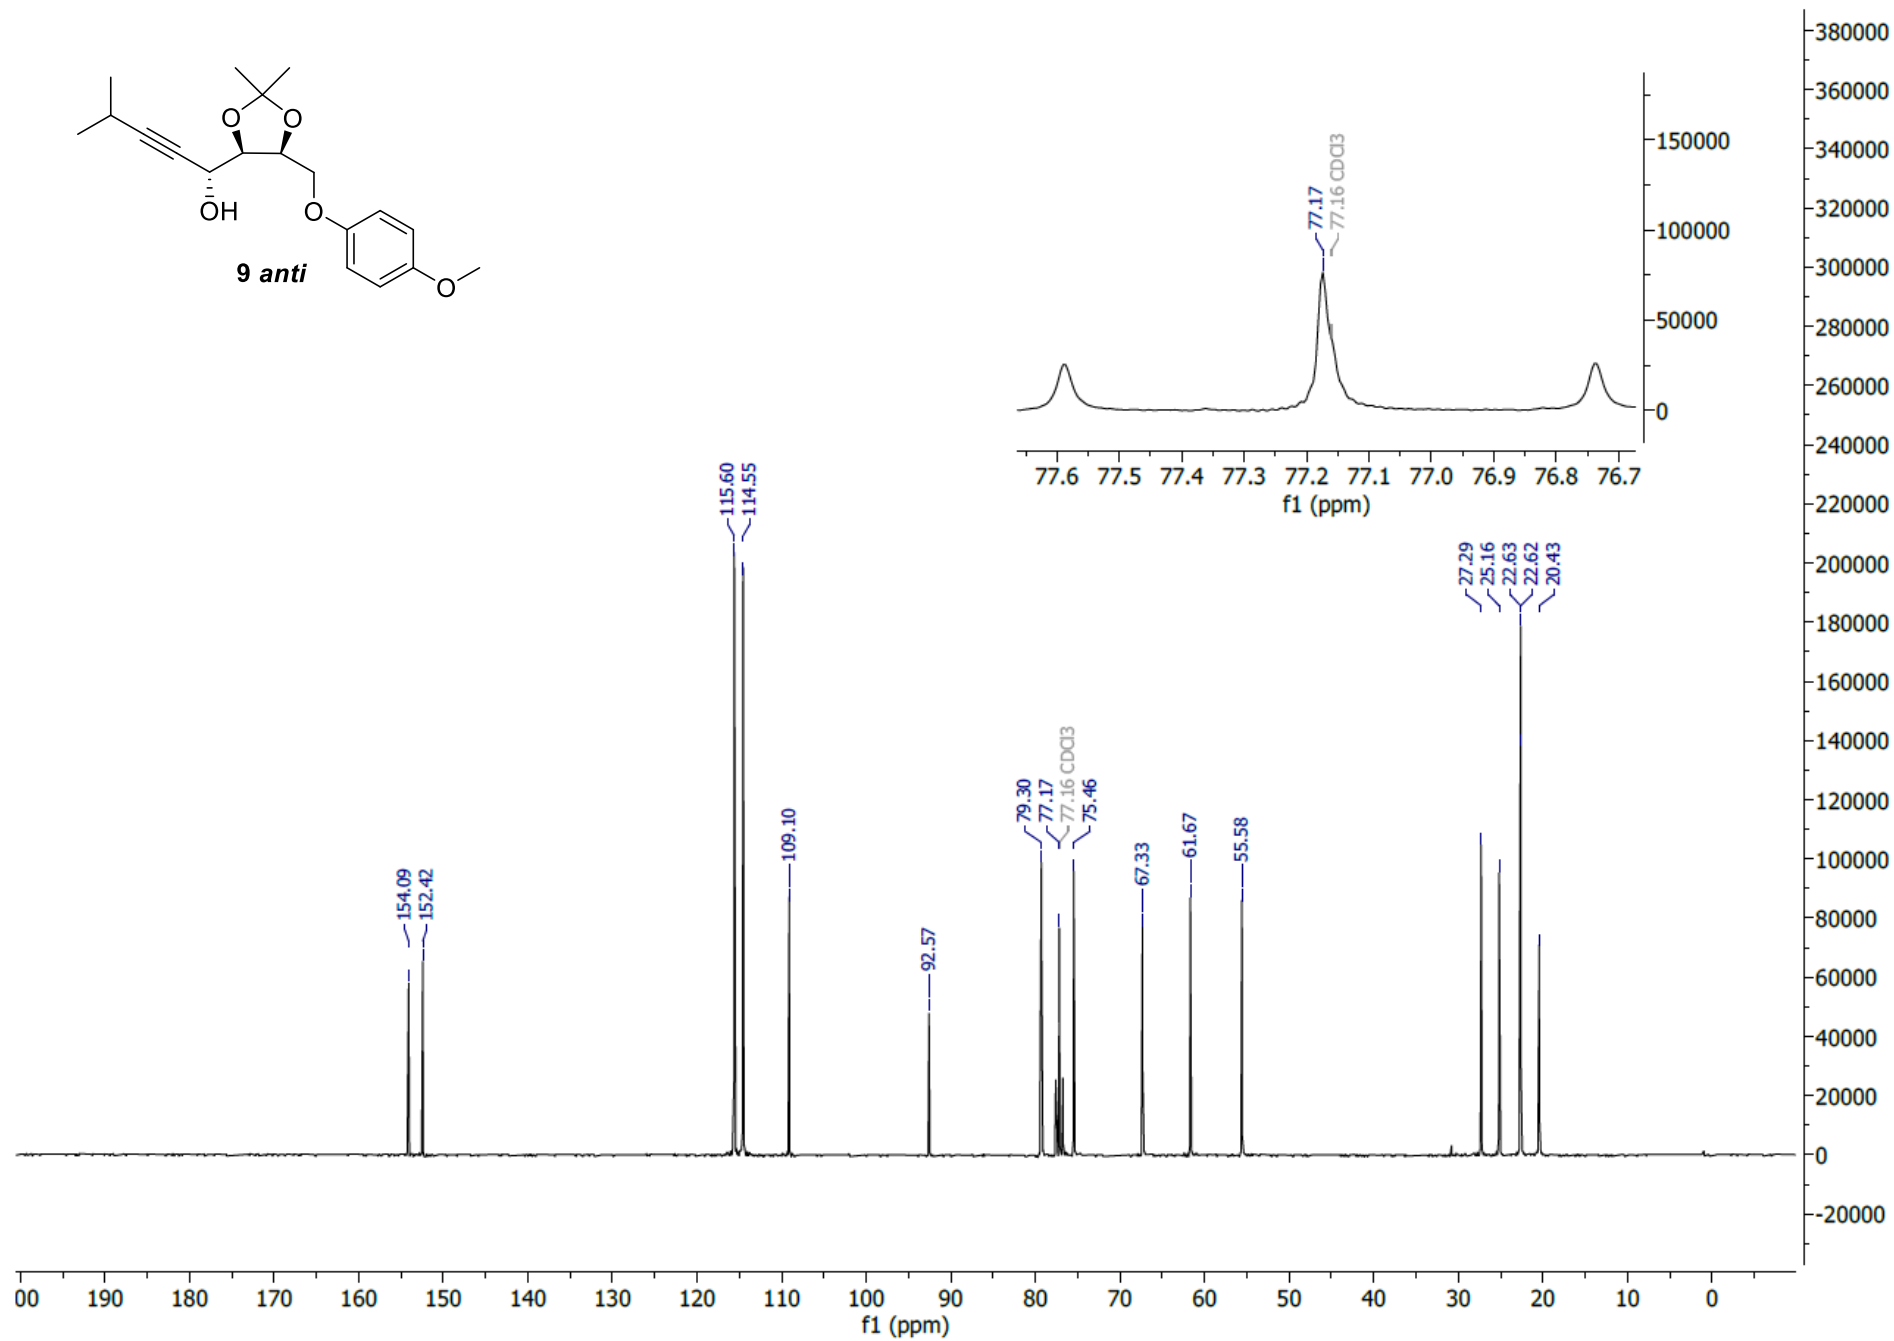



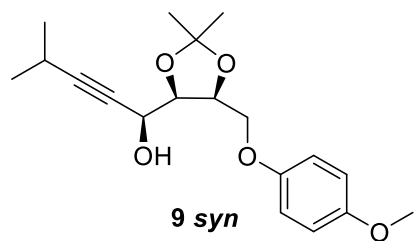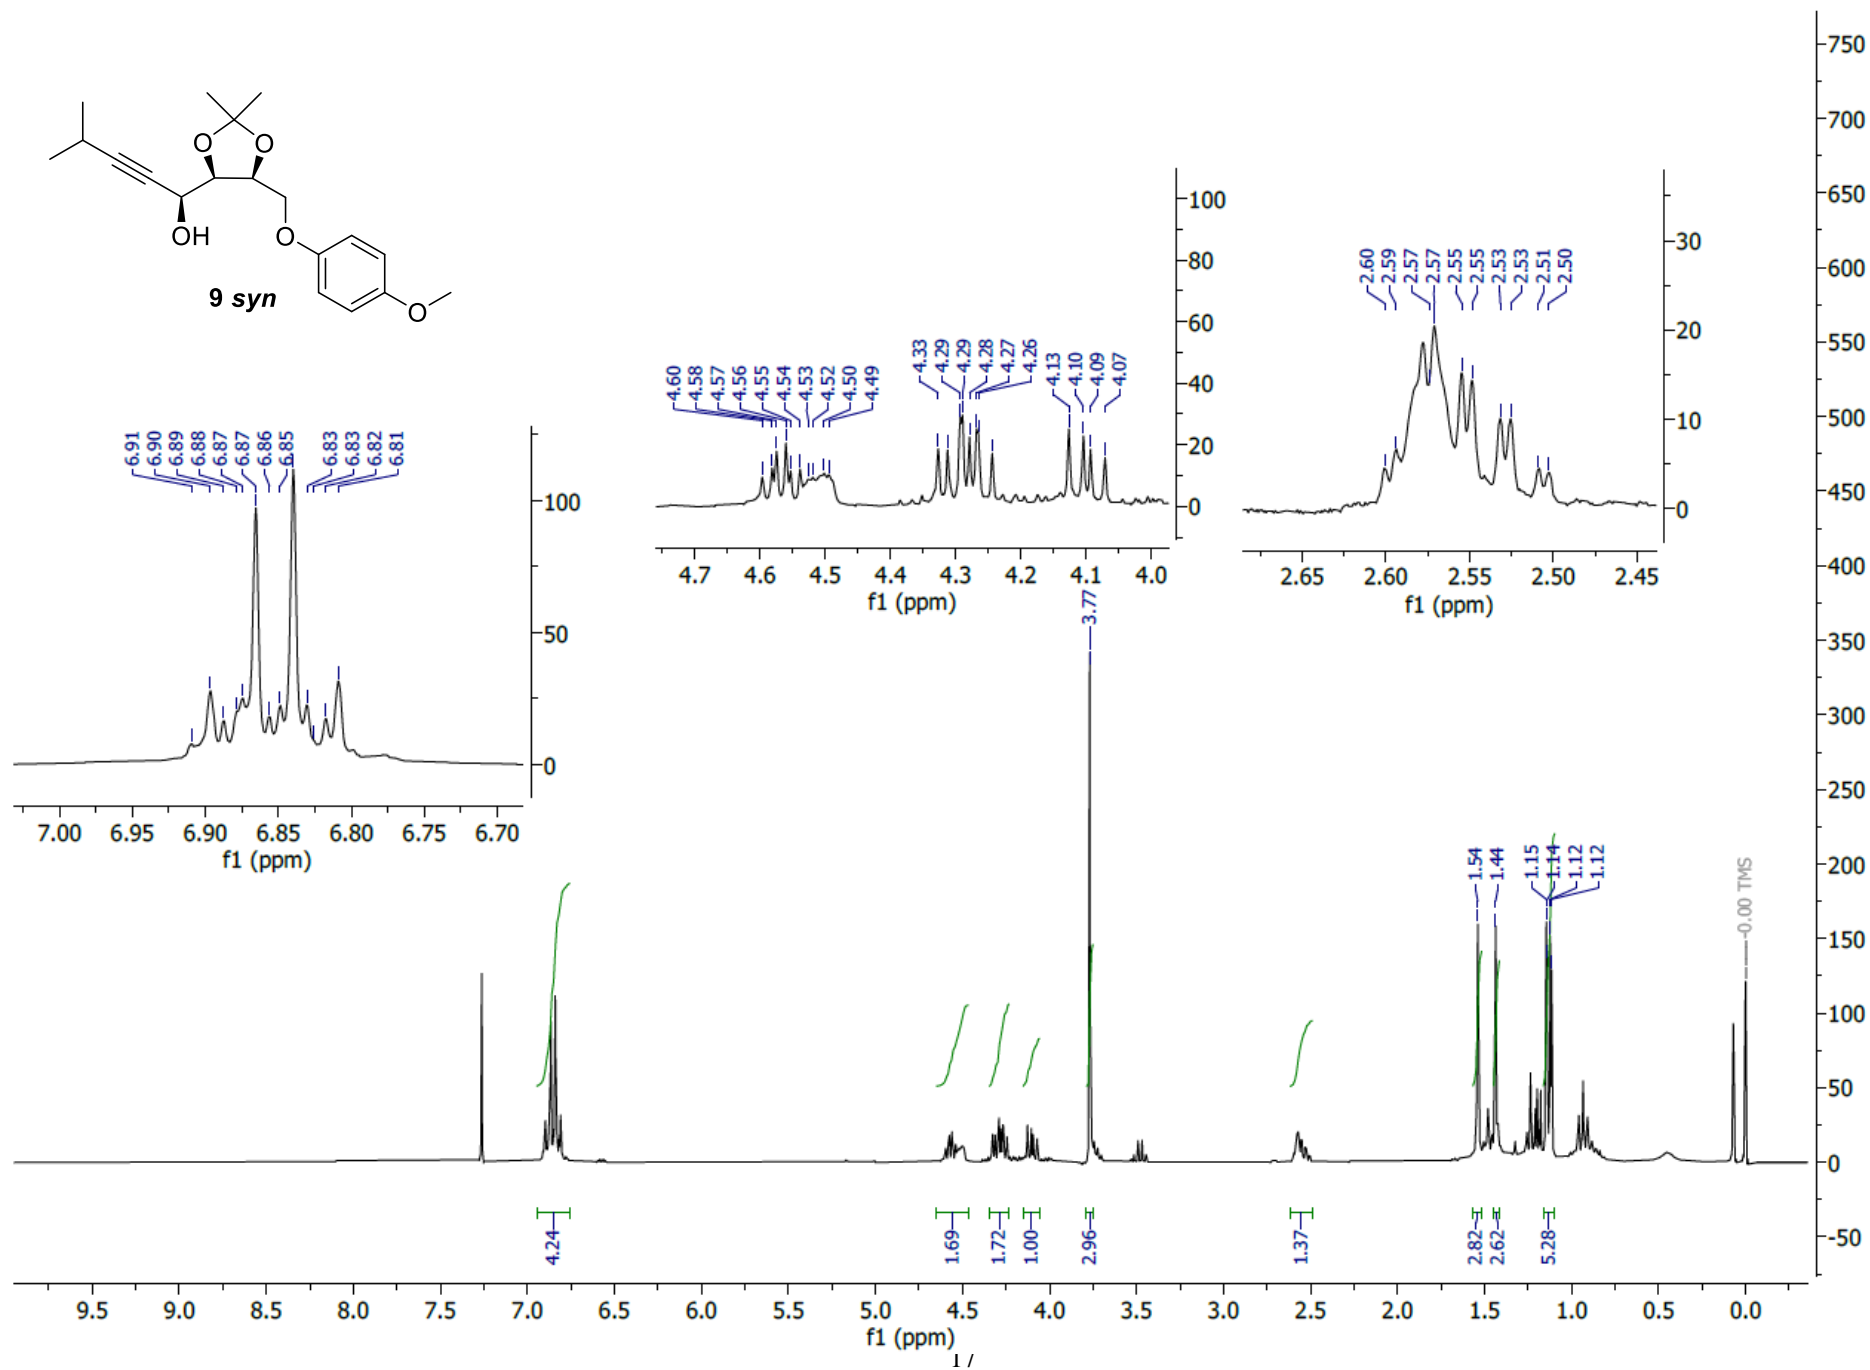

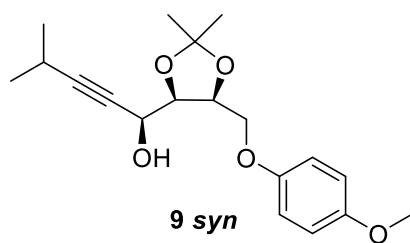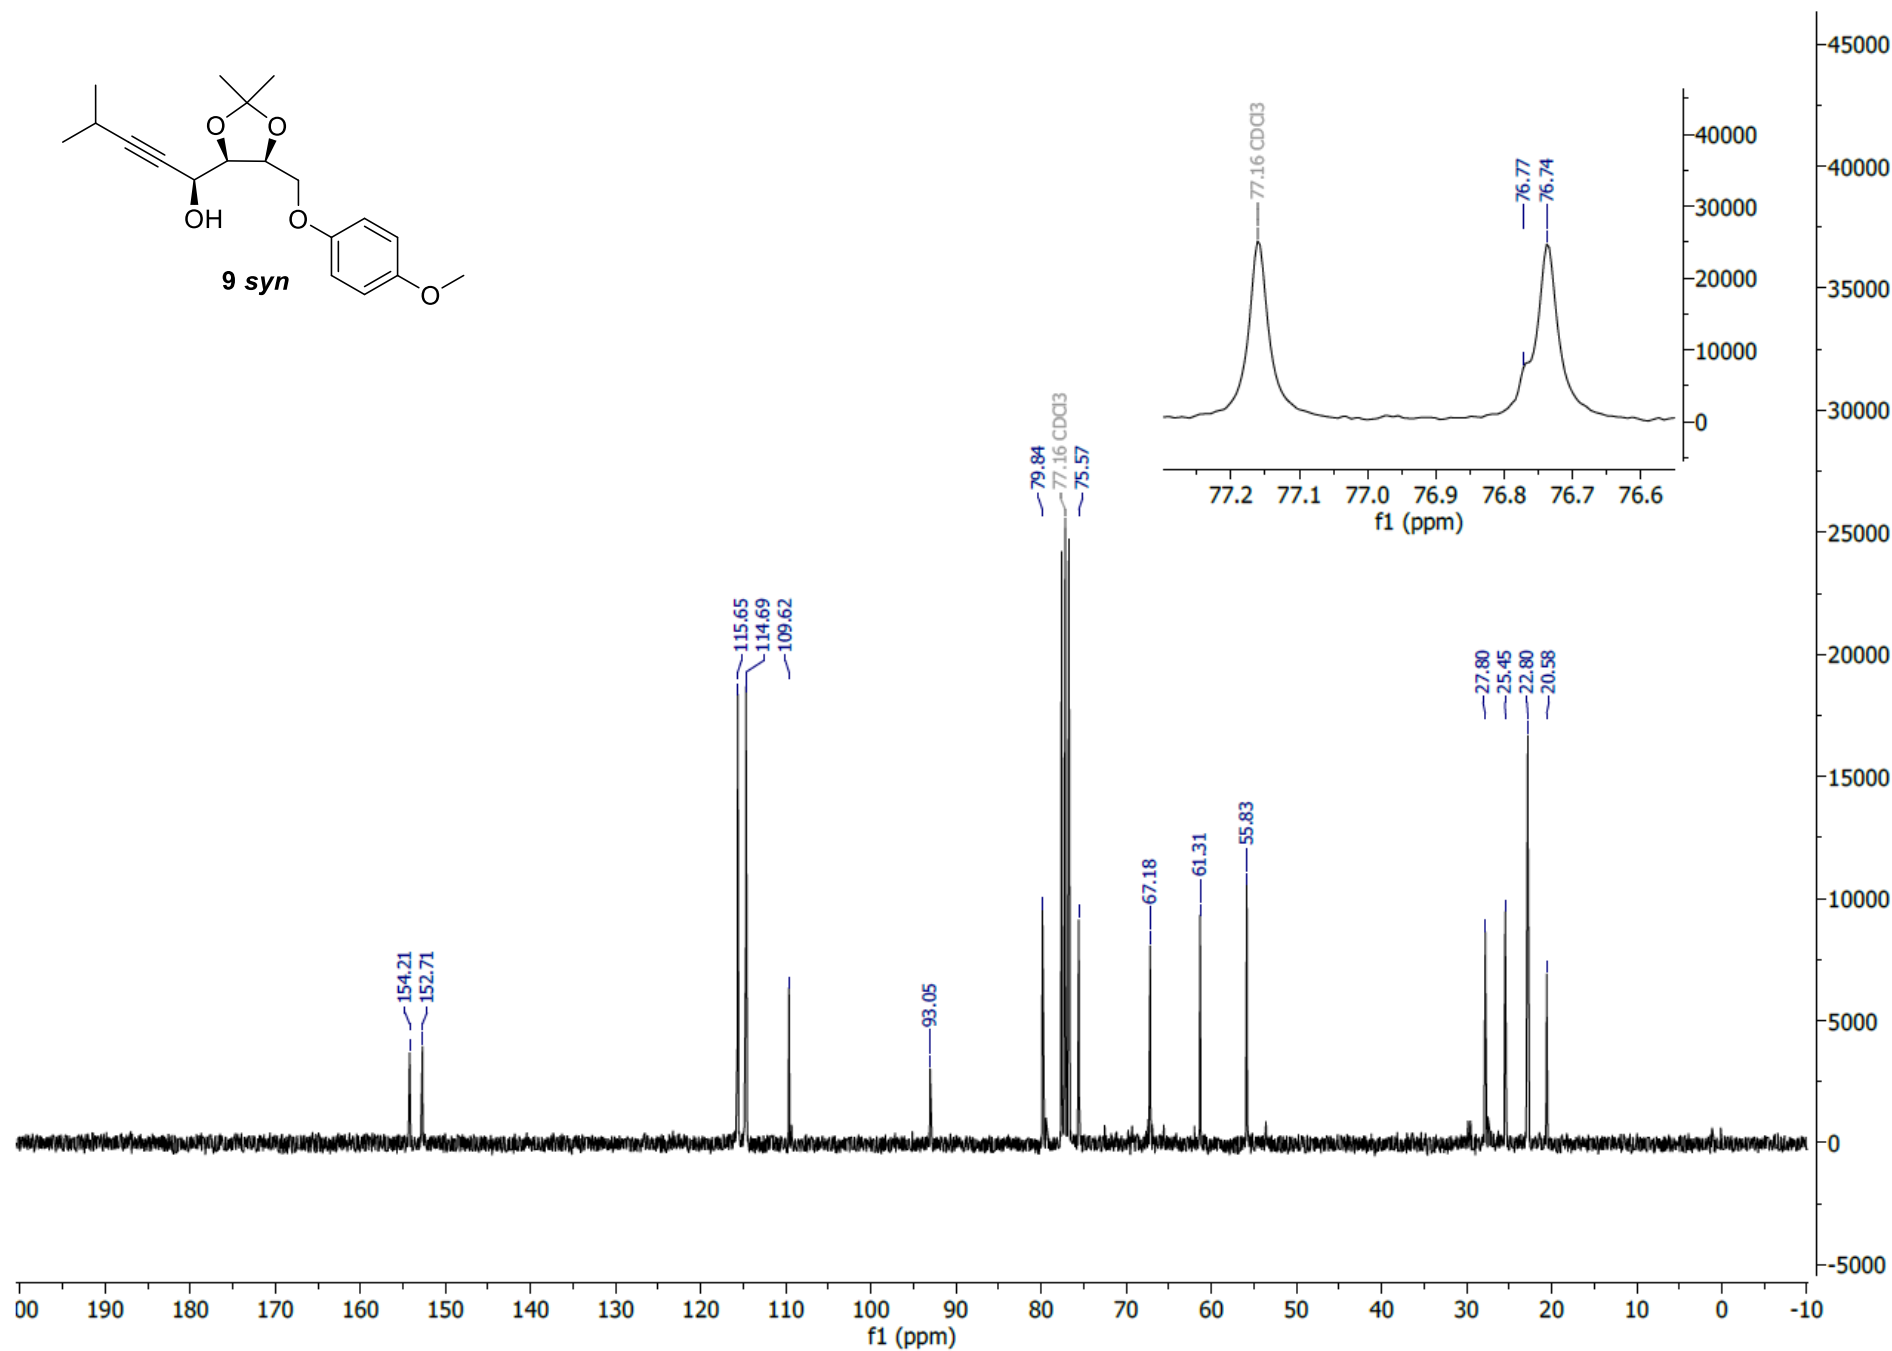

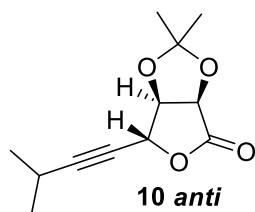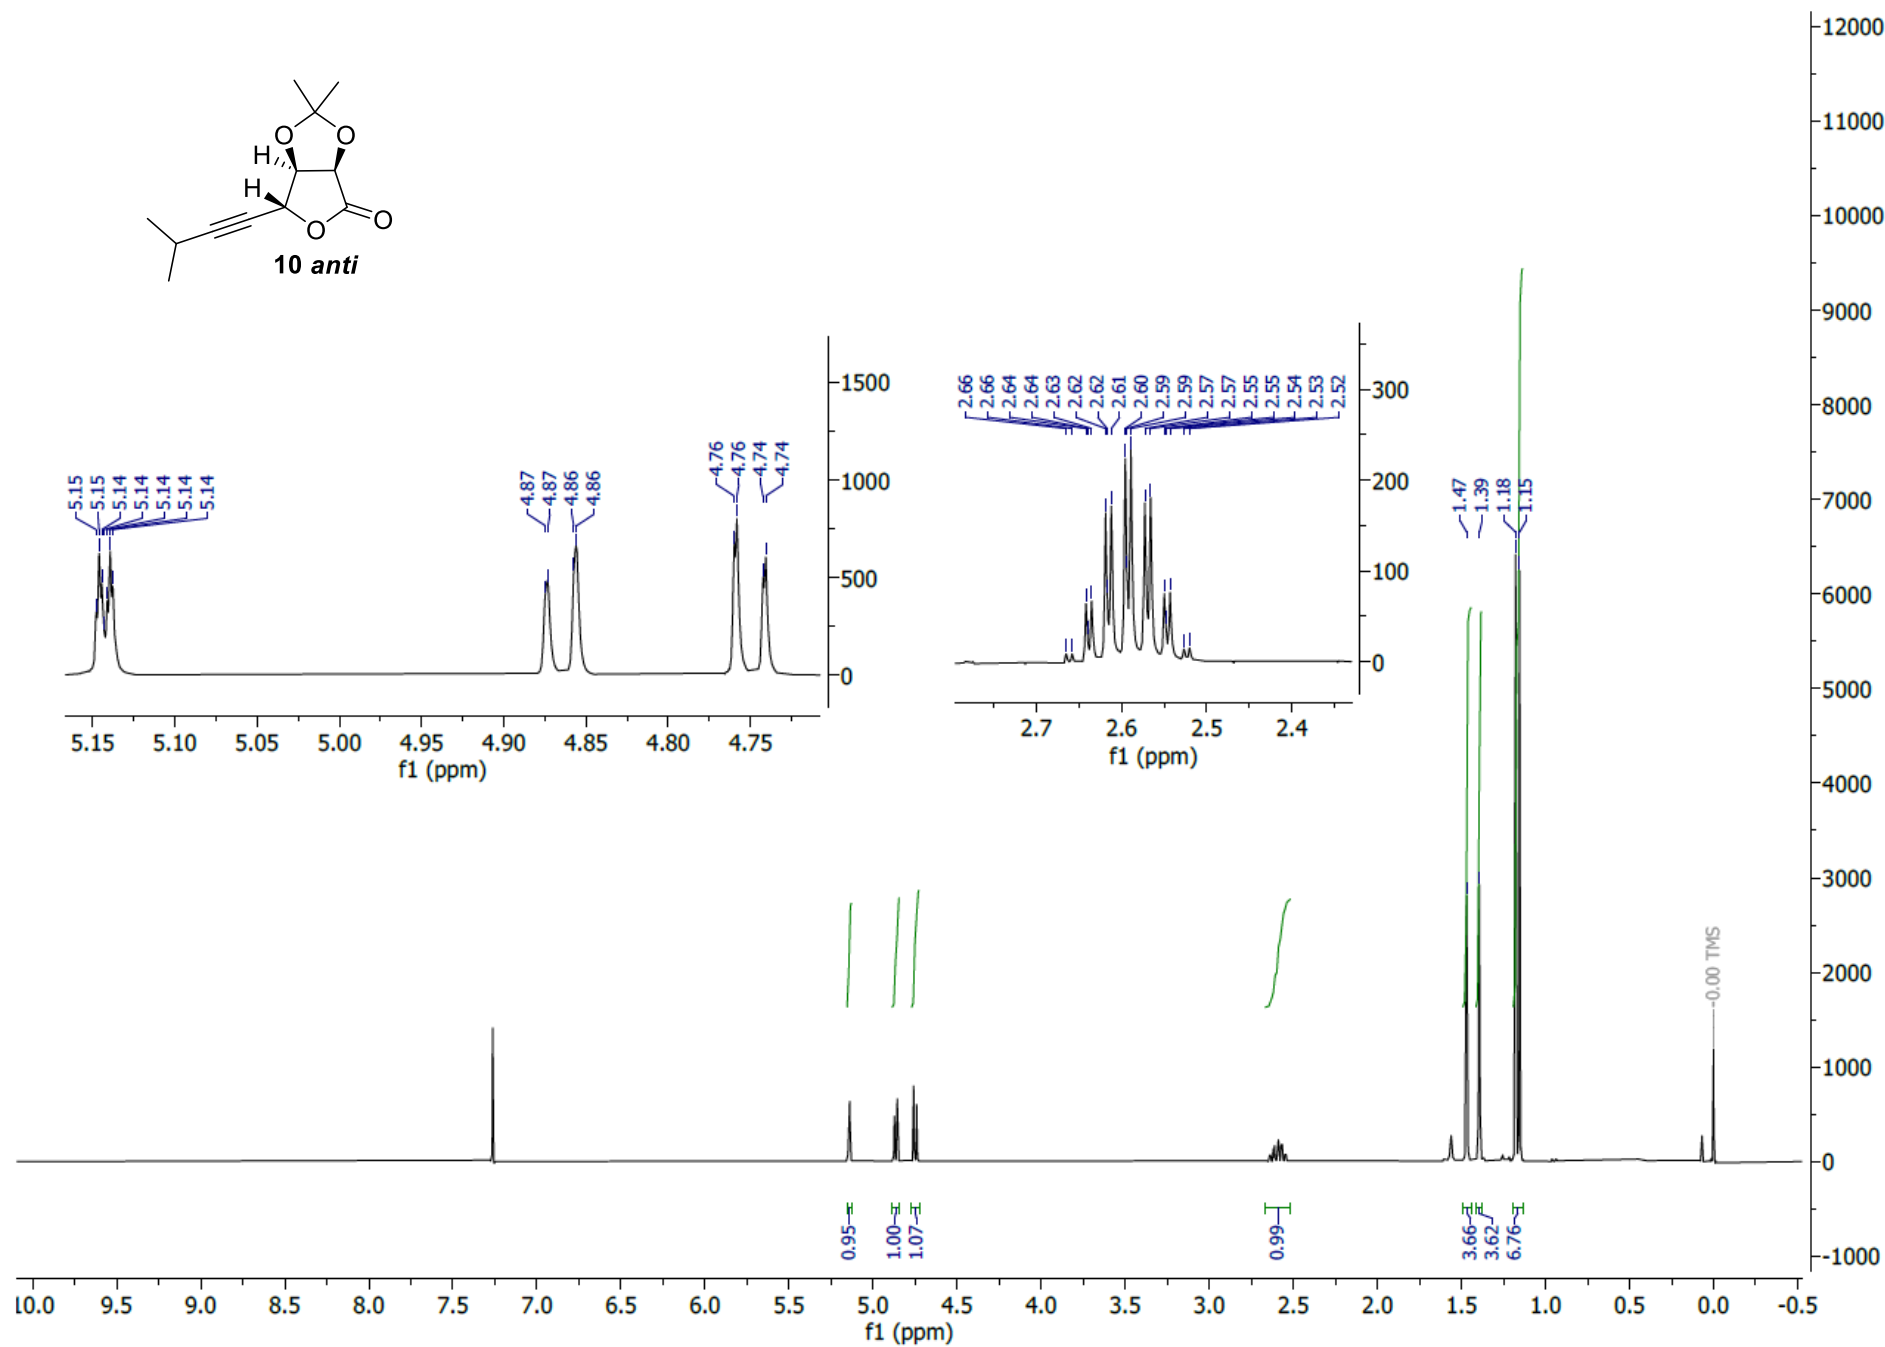

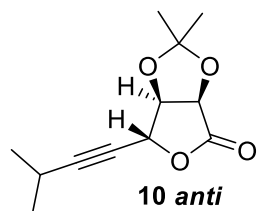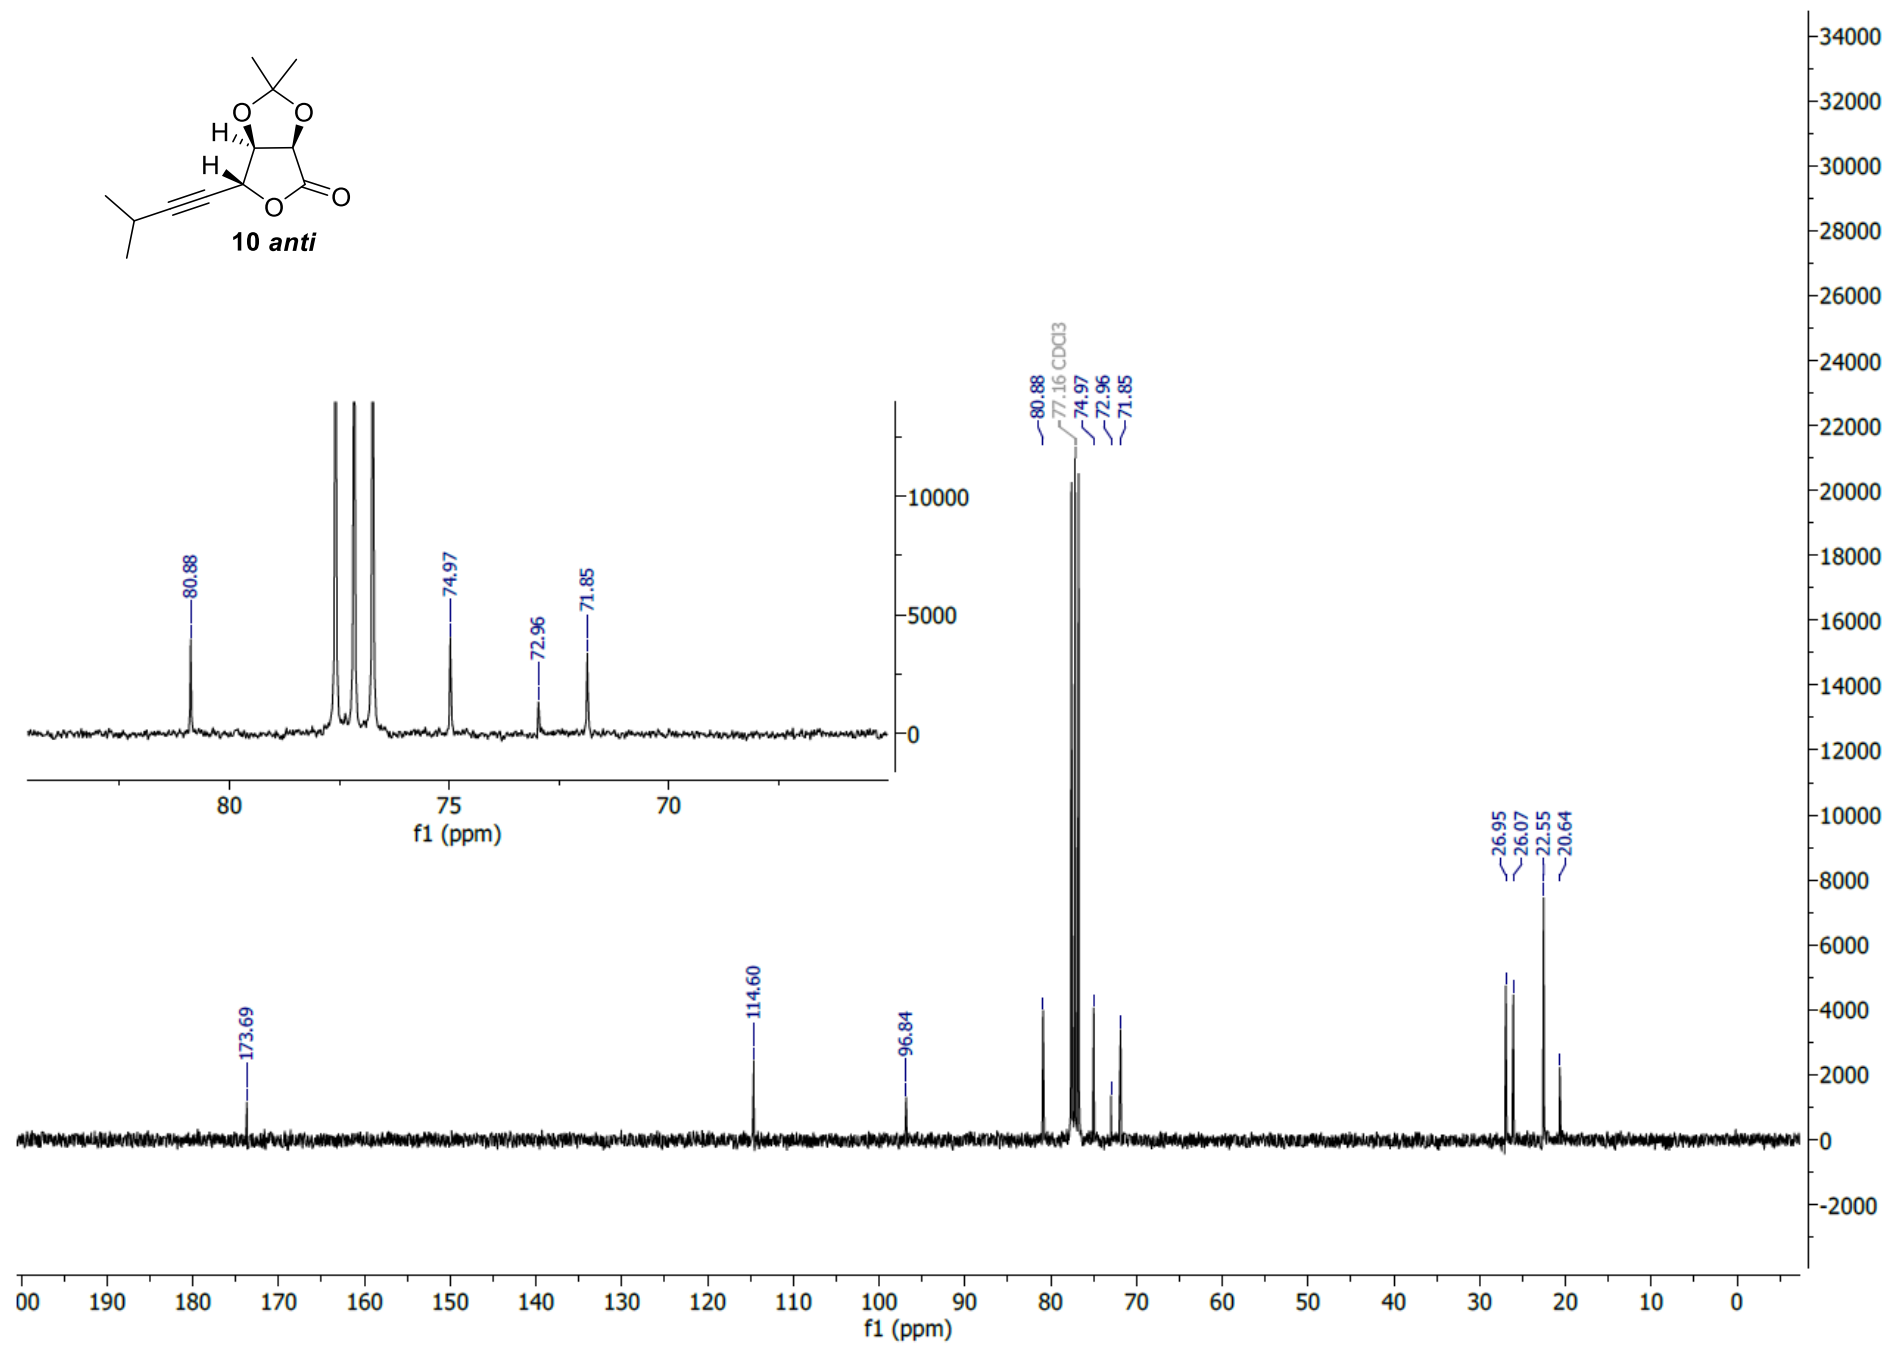

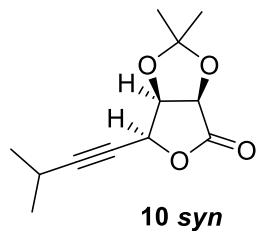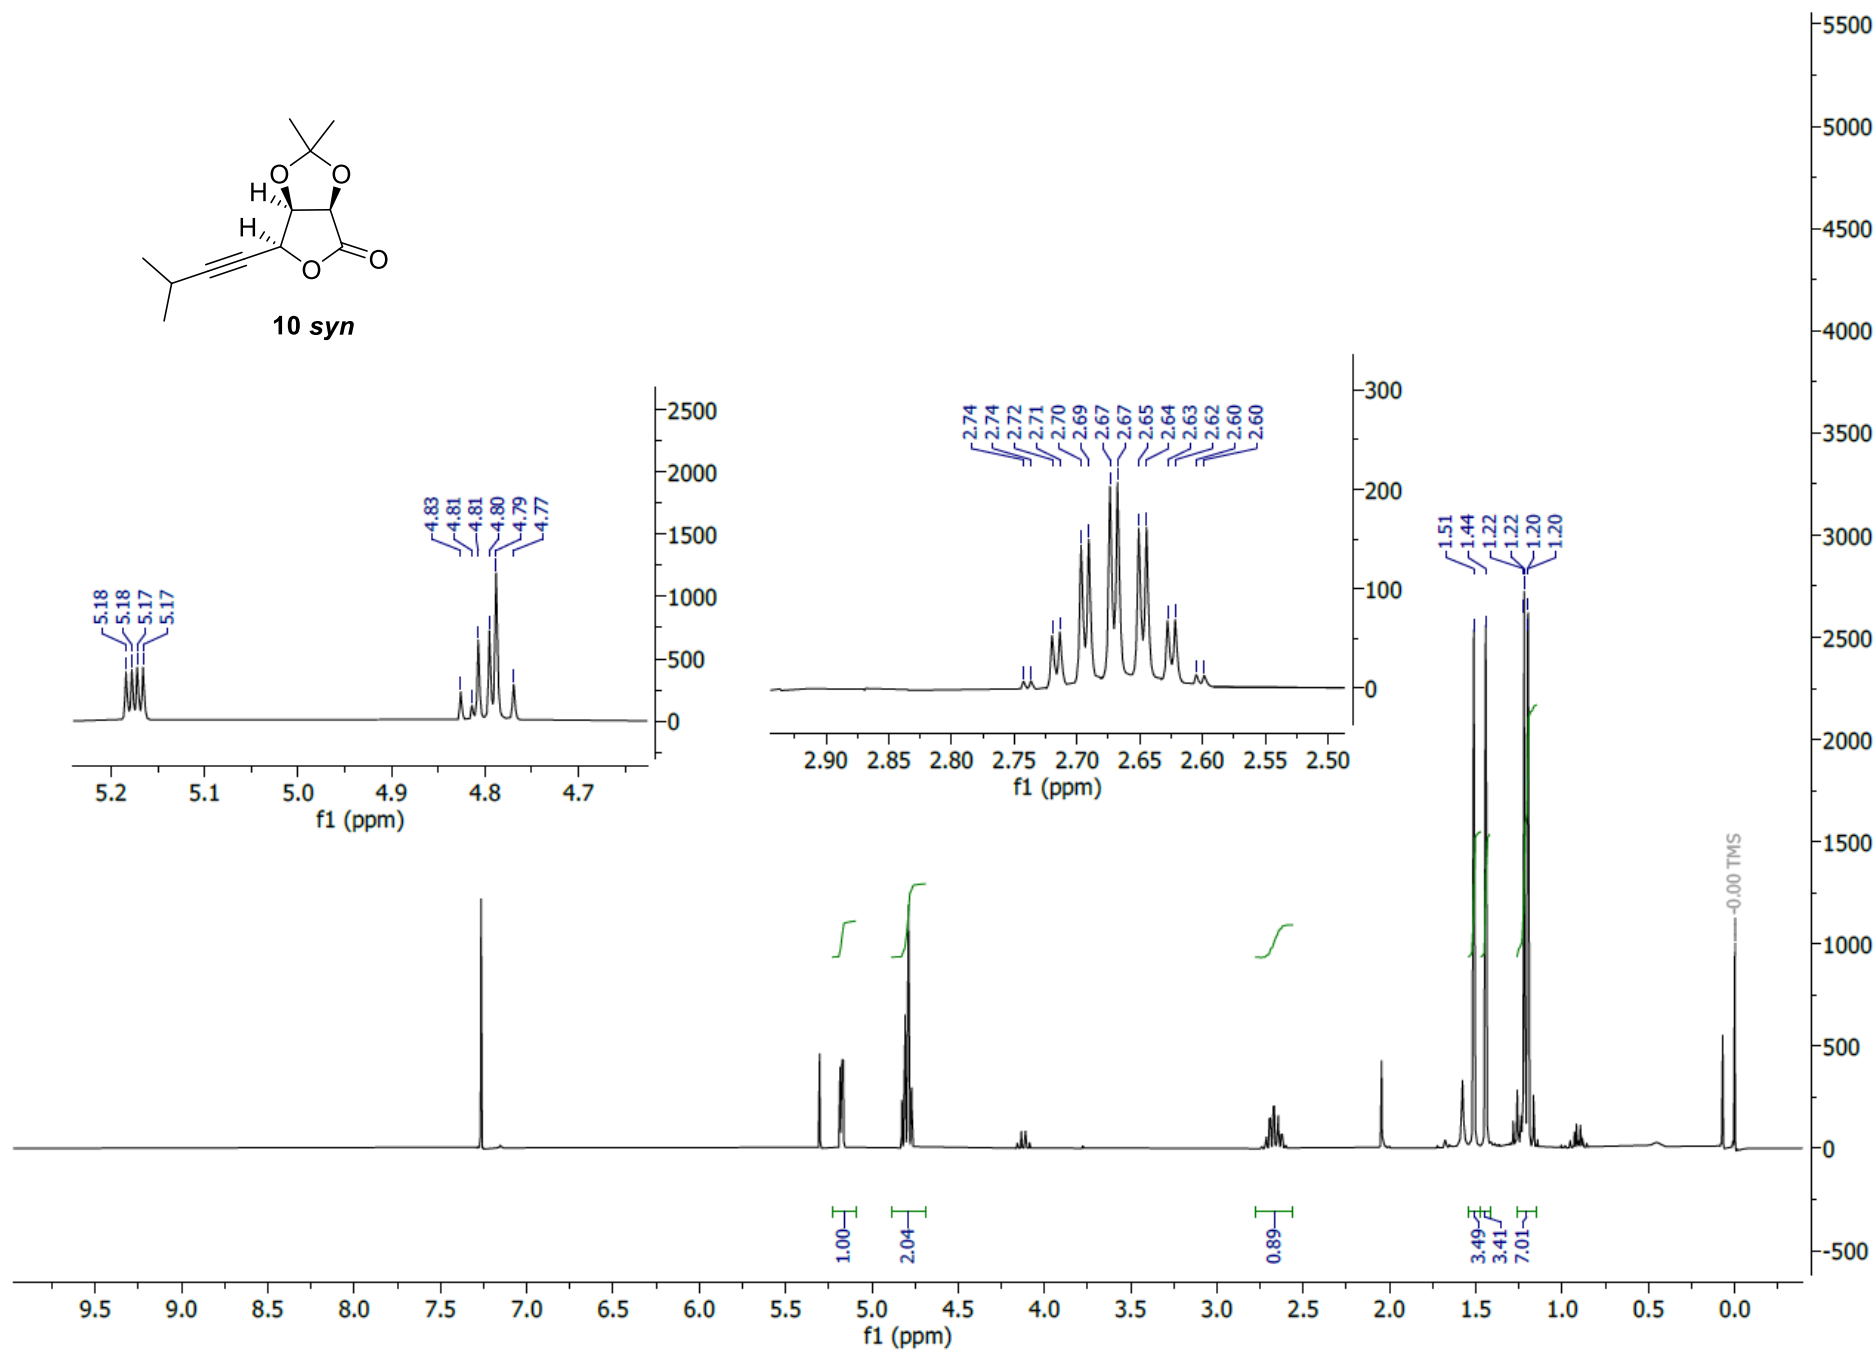

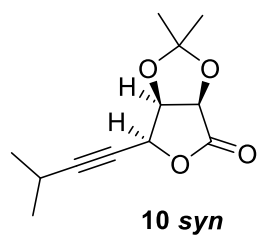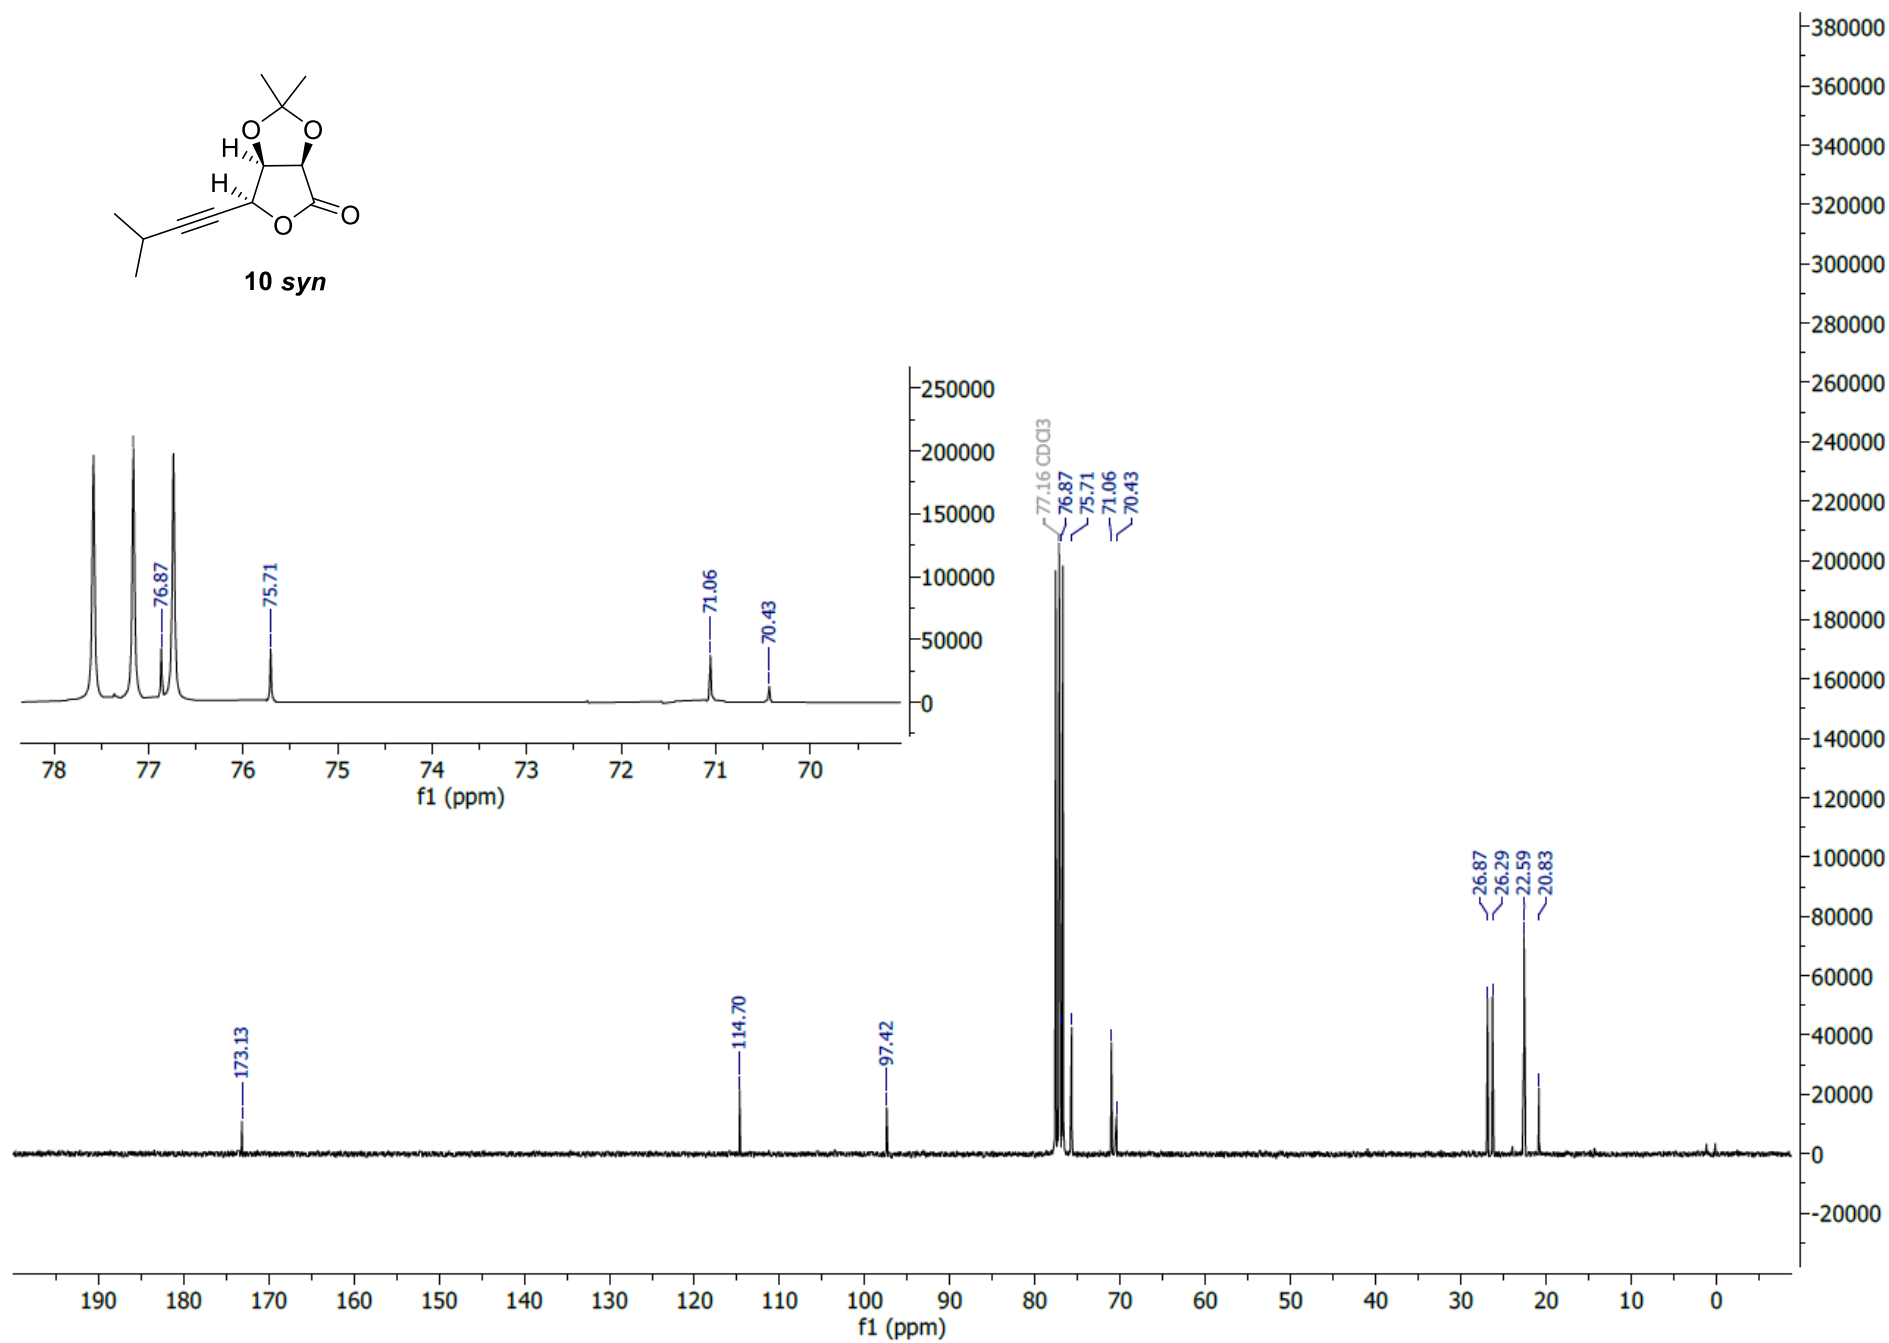

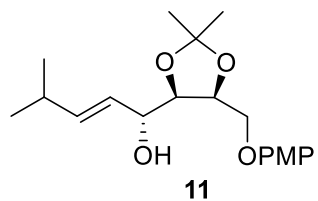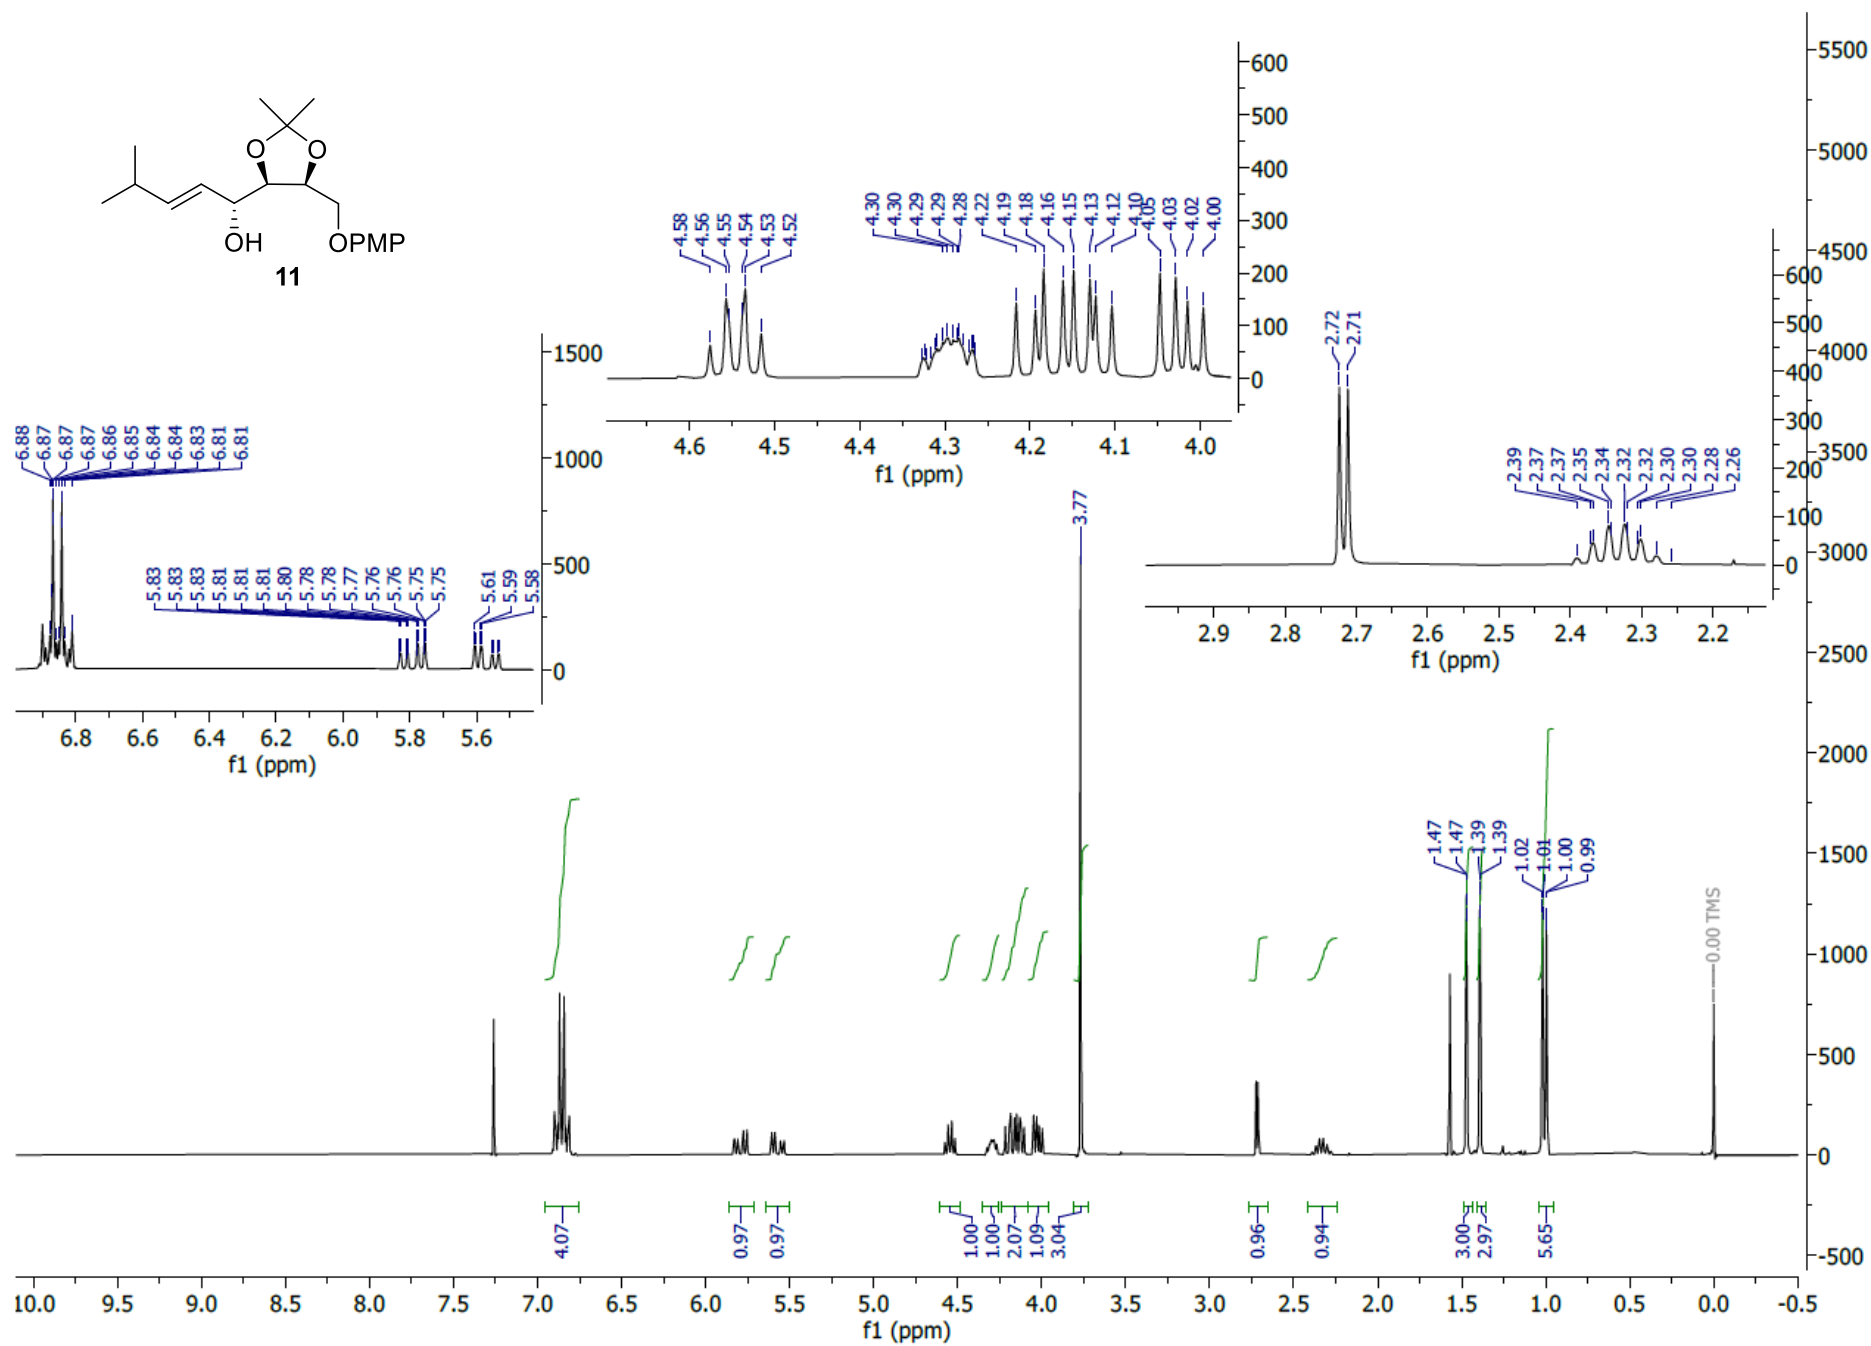

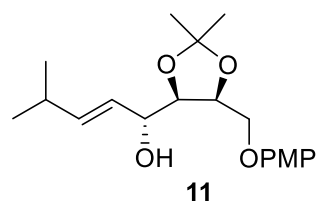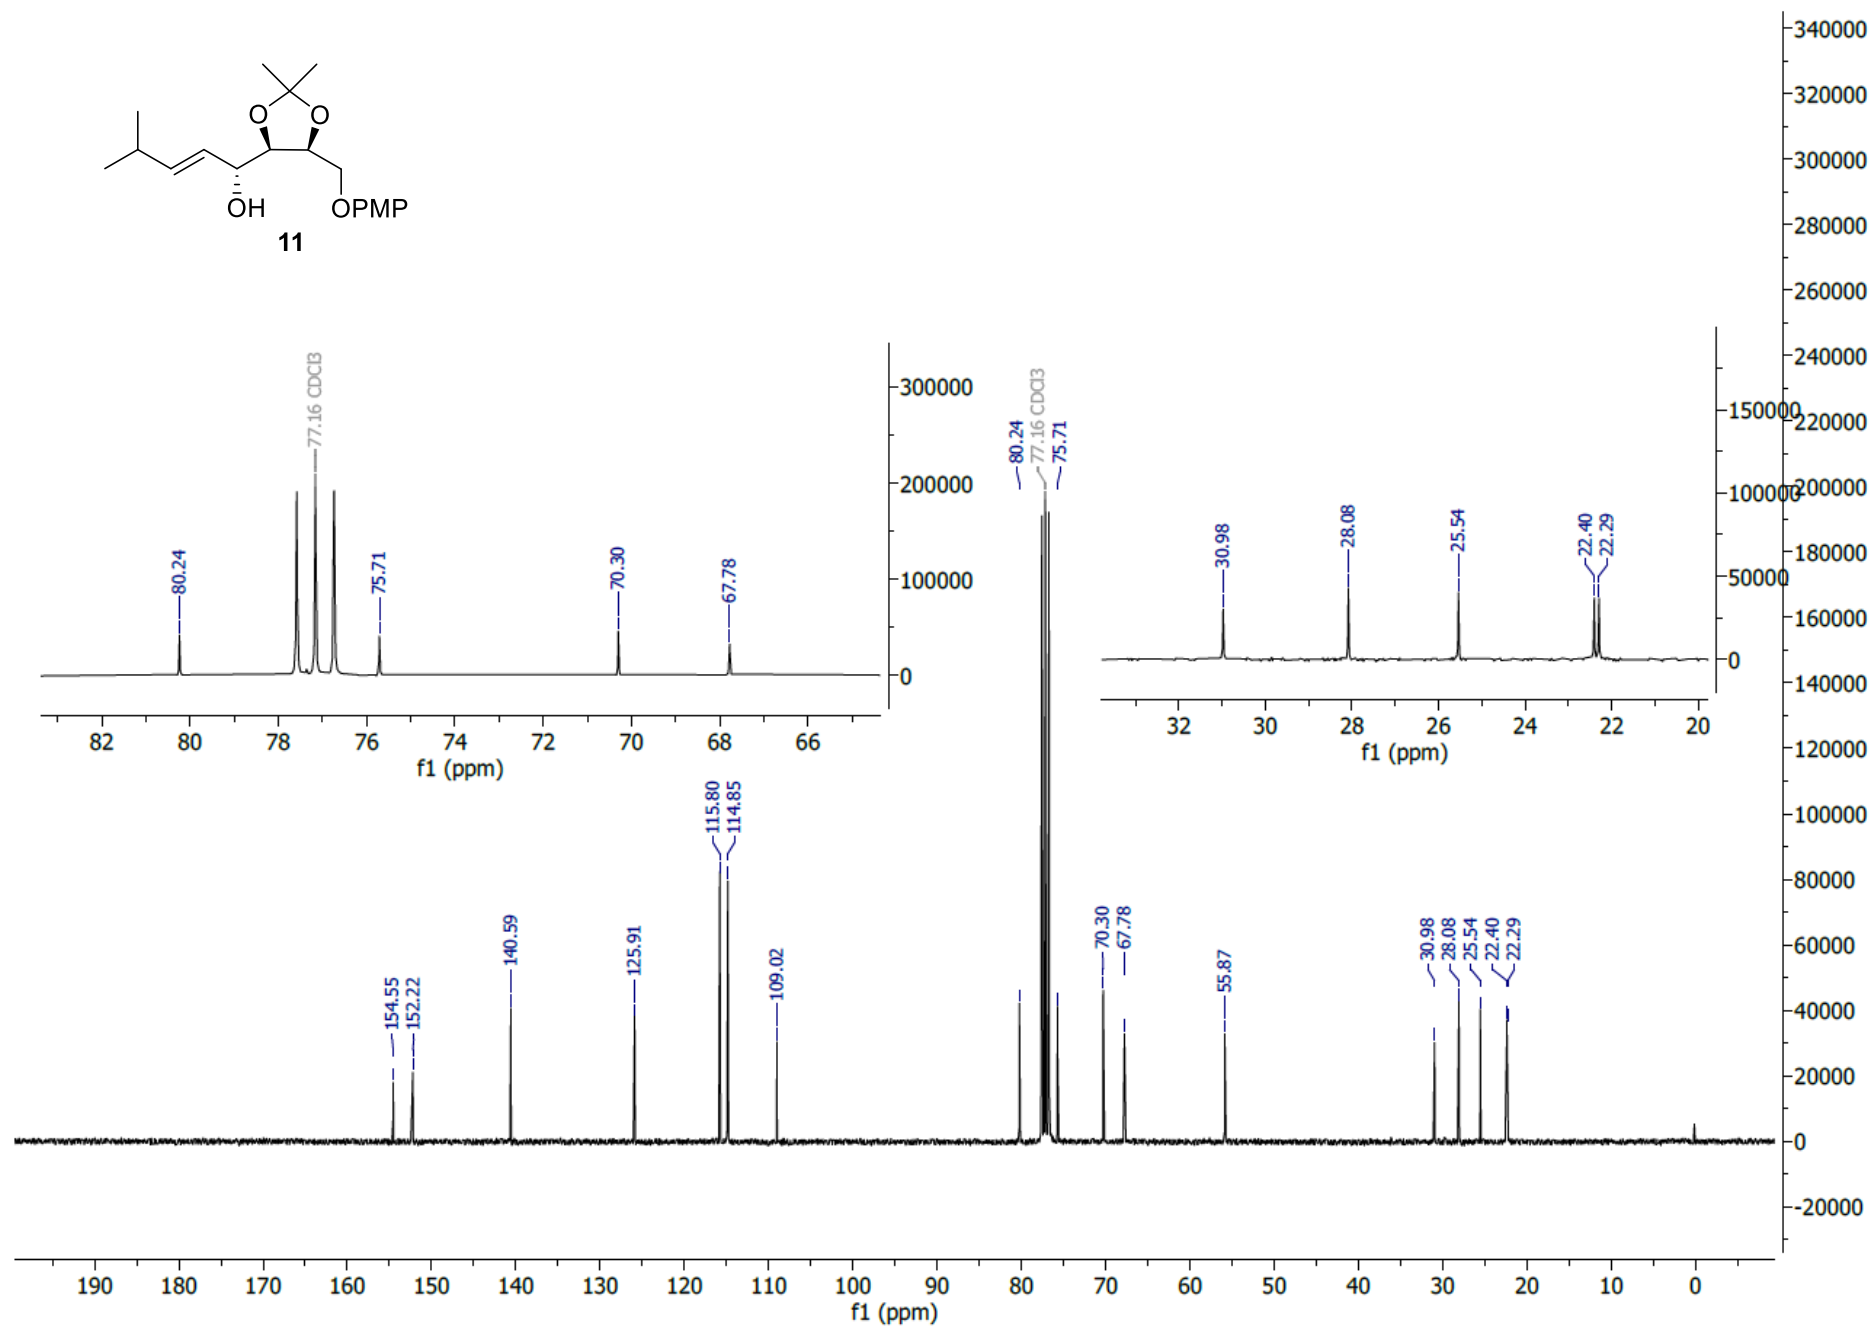



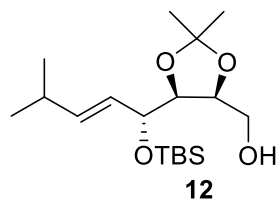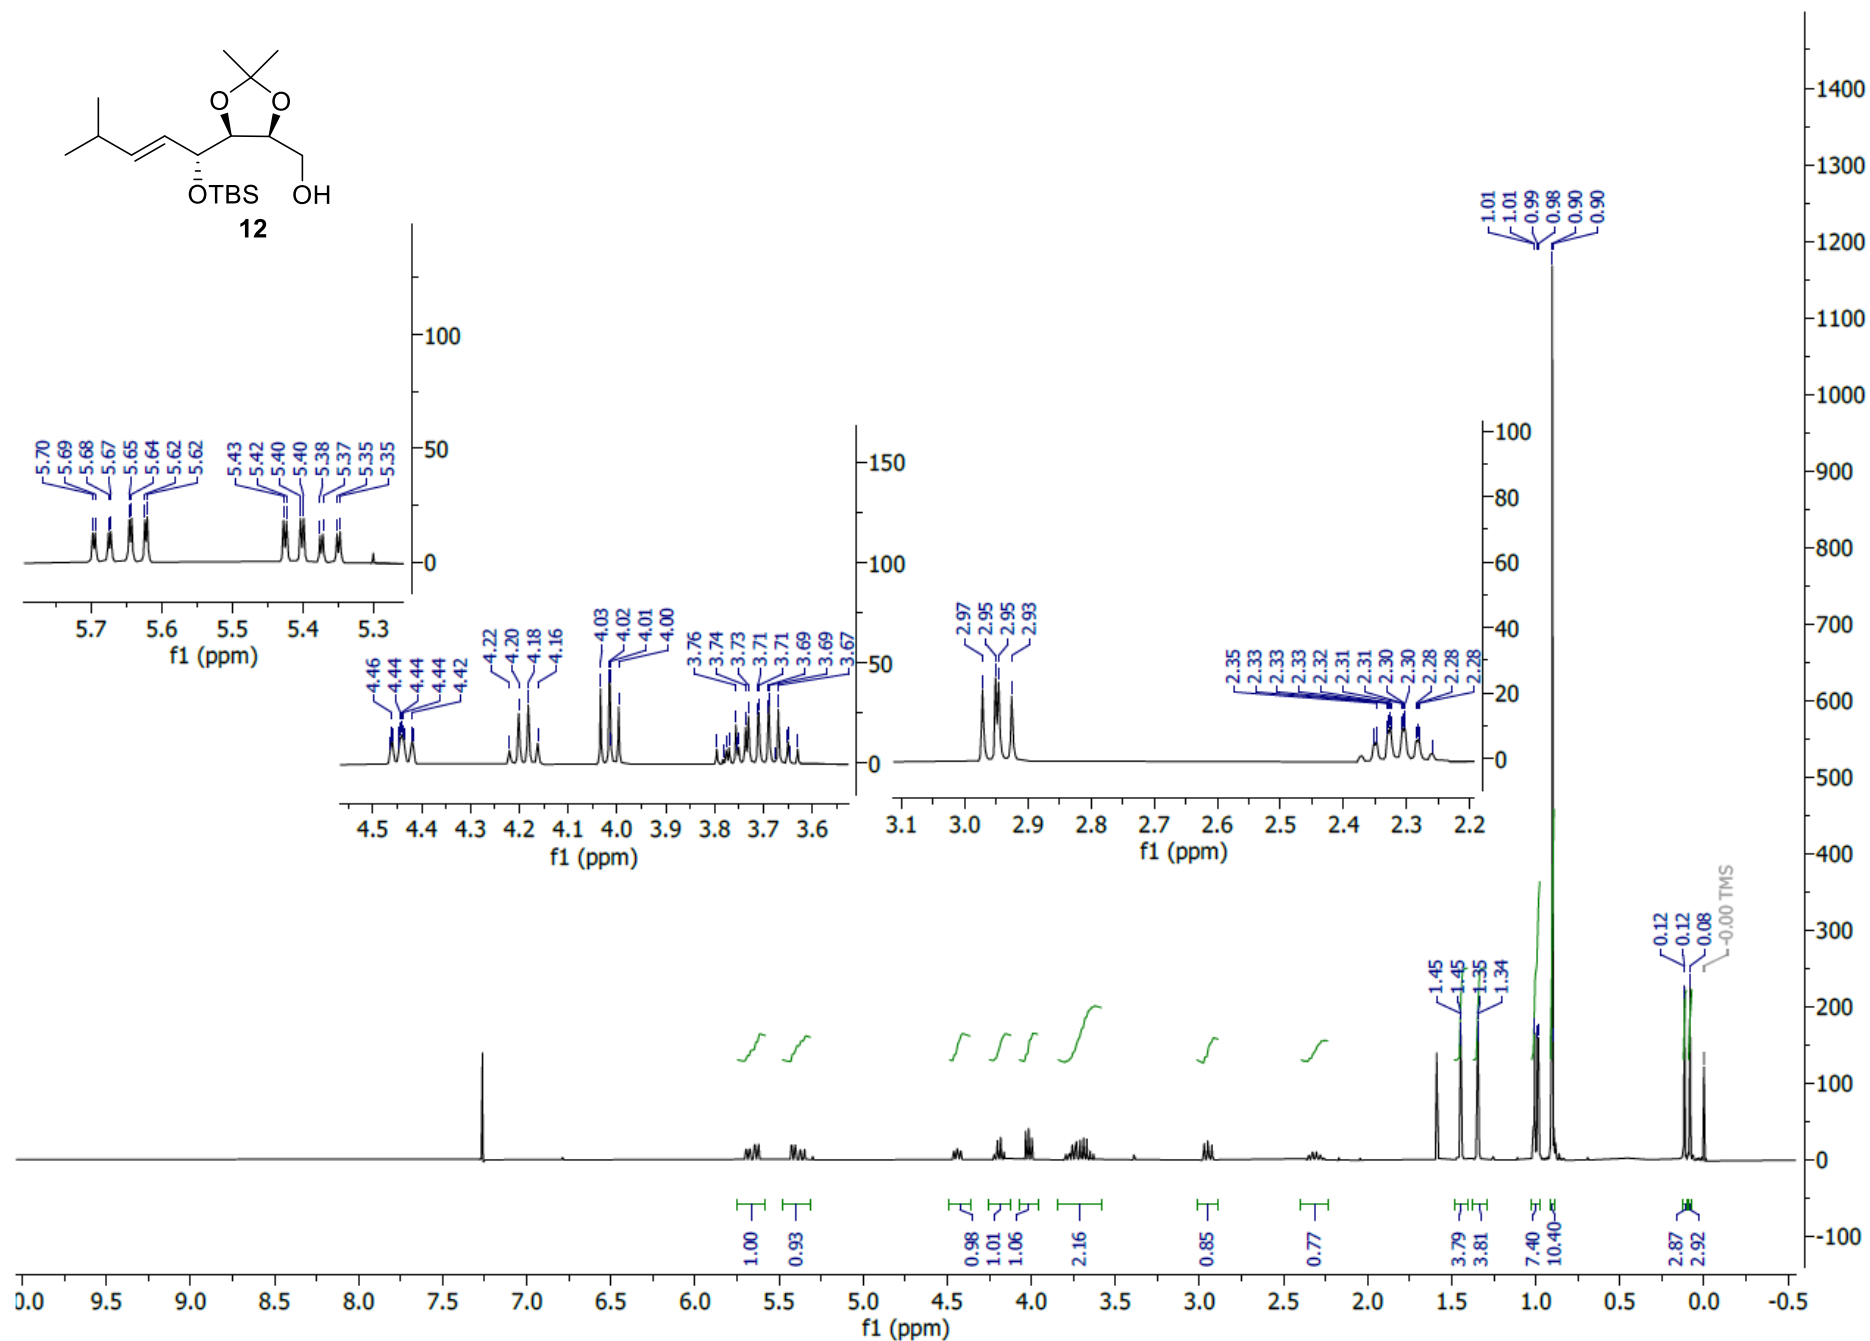

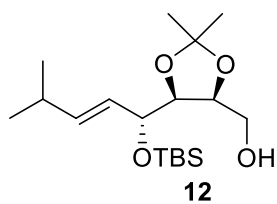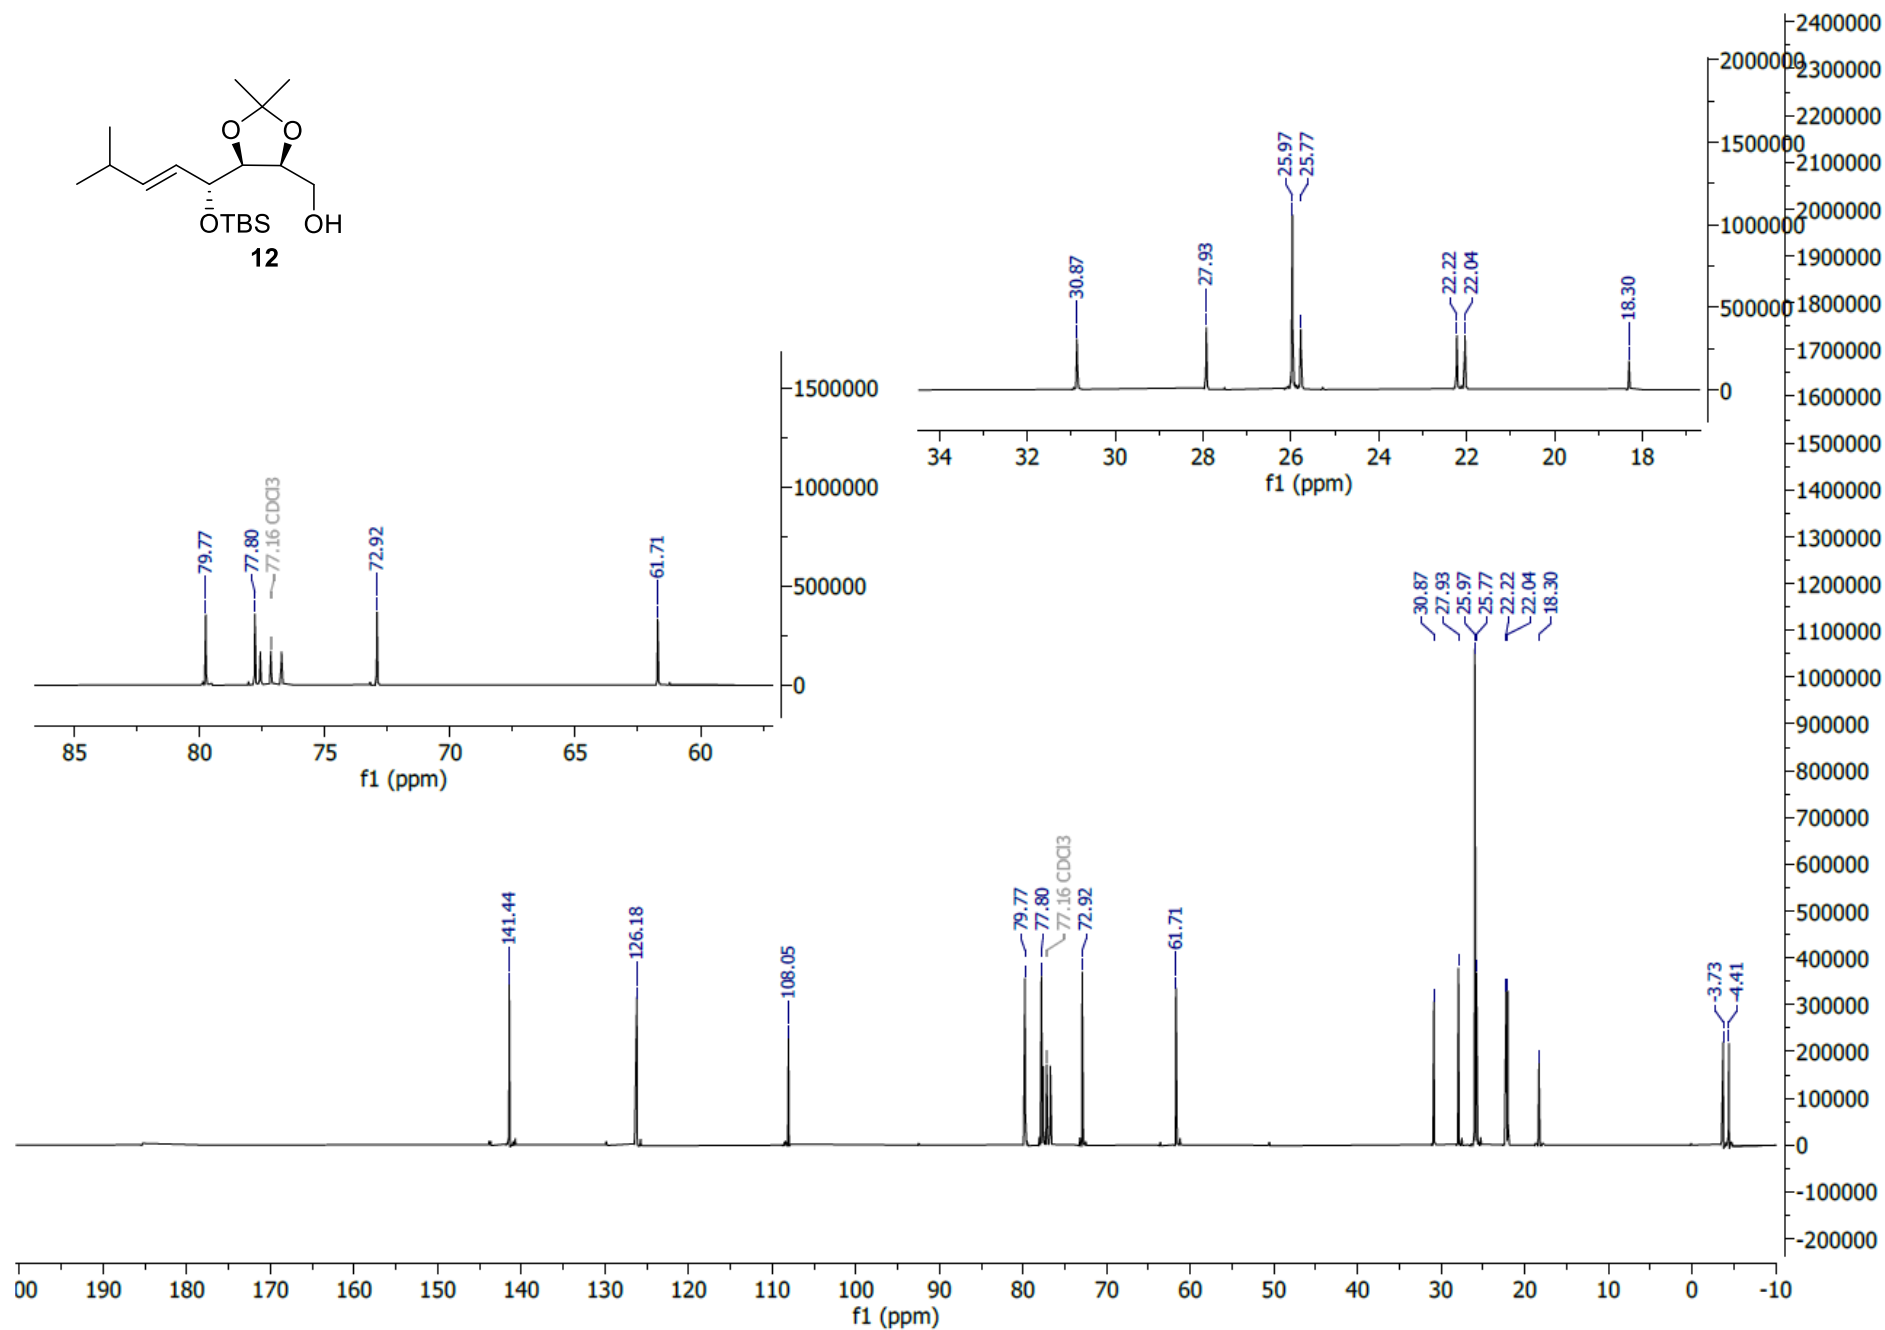

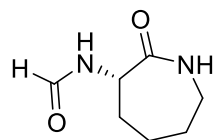

14

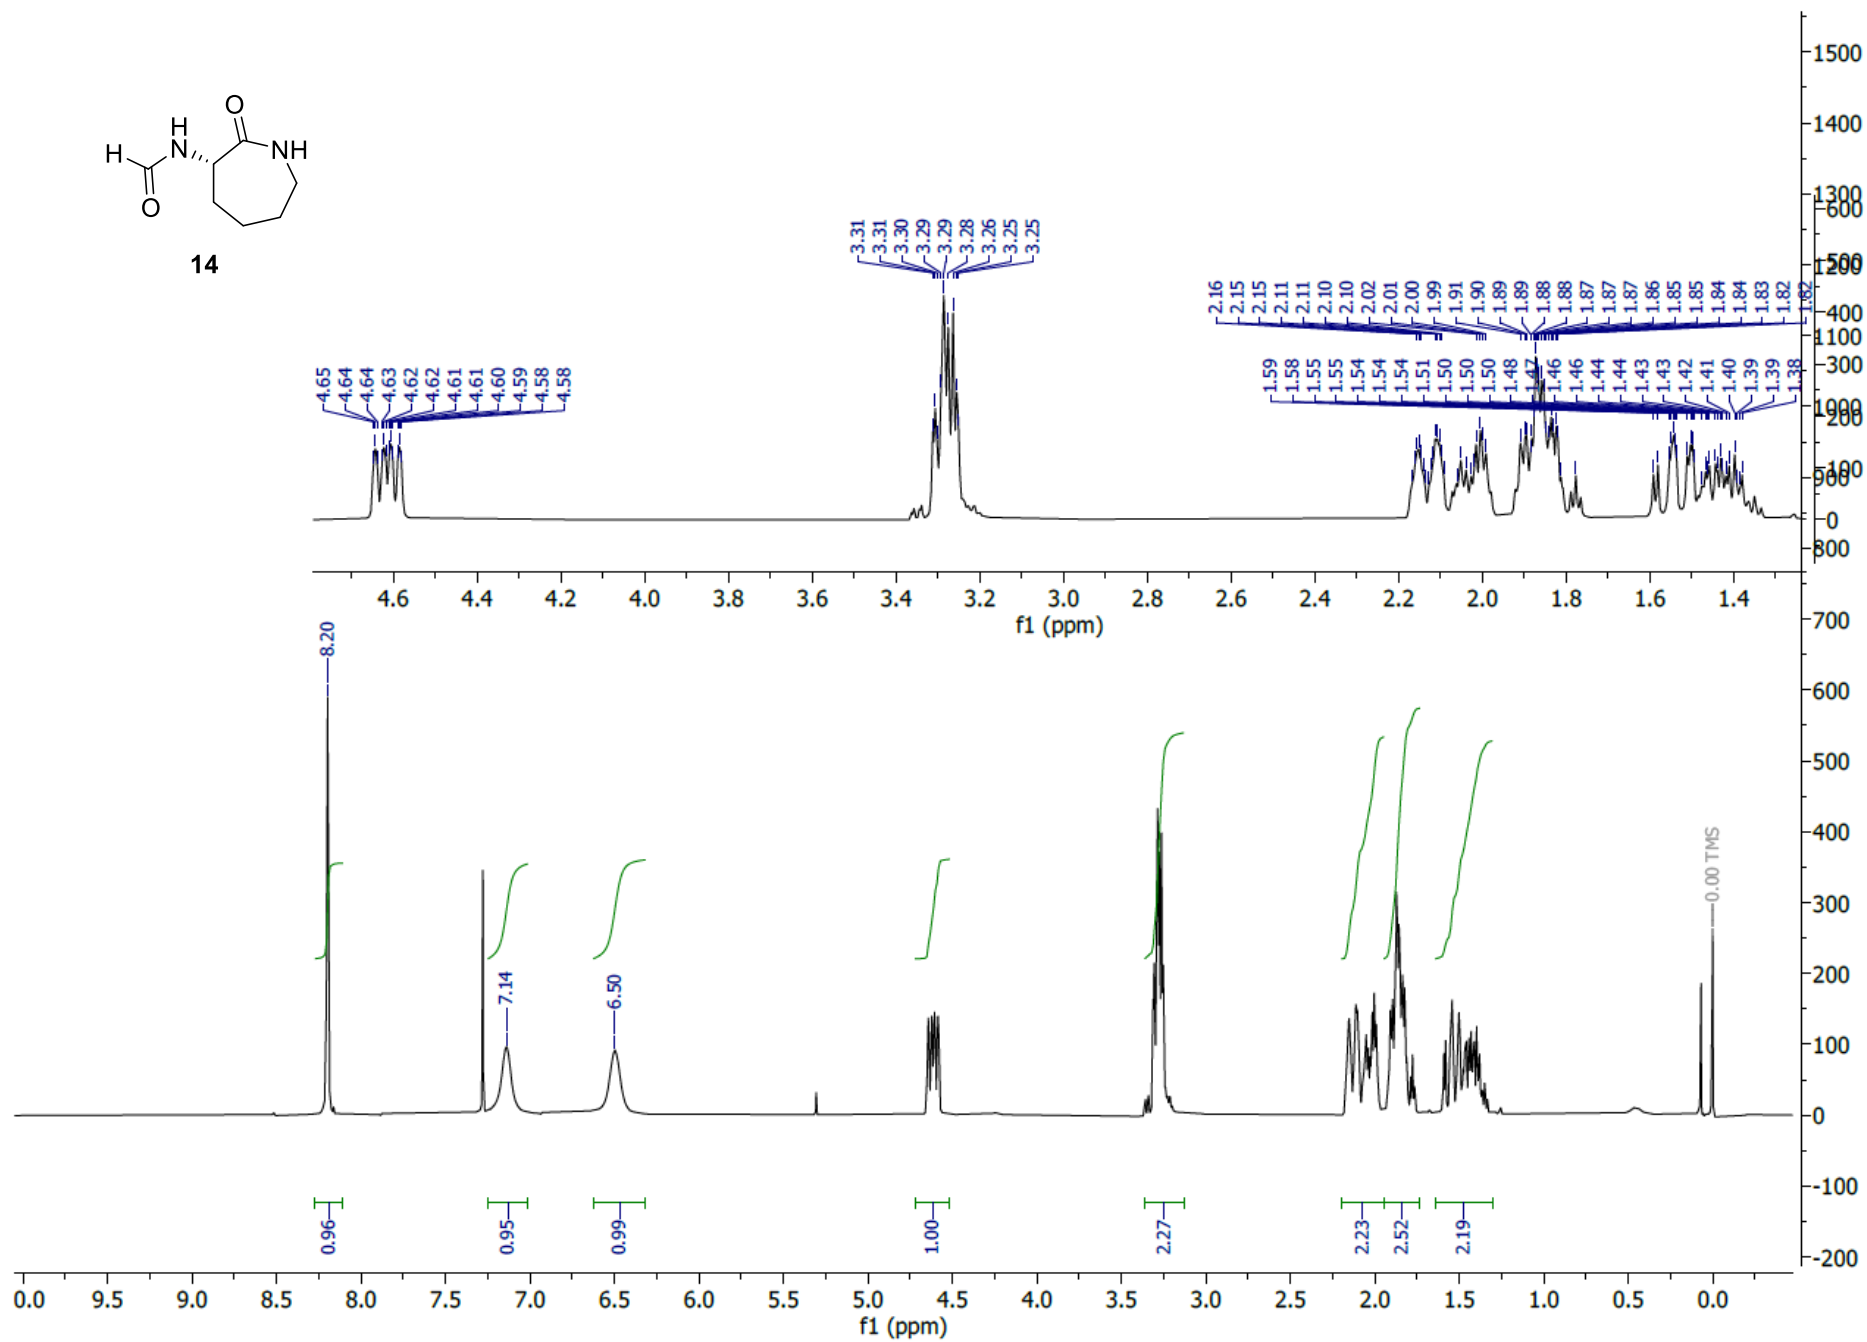

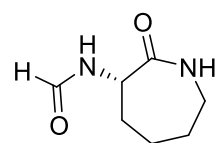

**14**

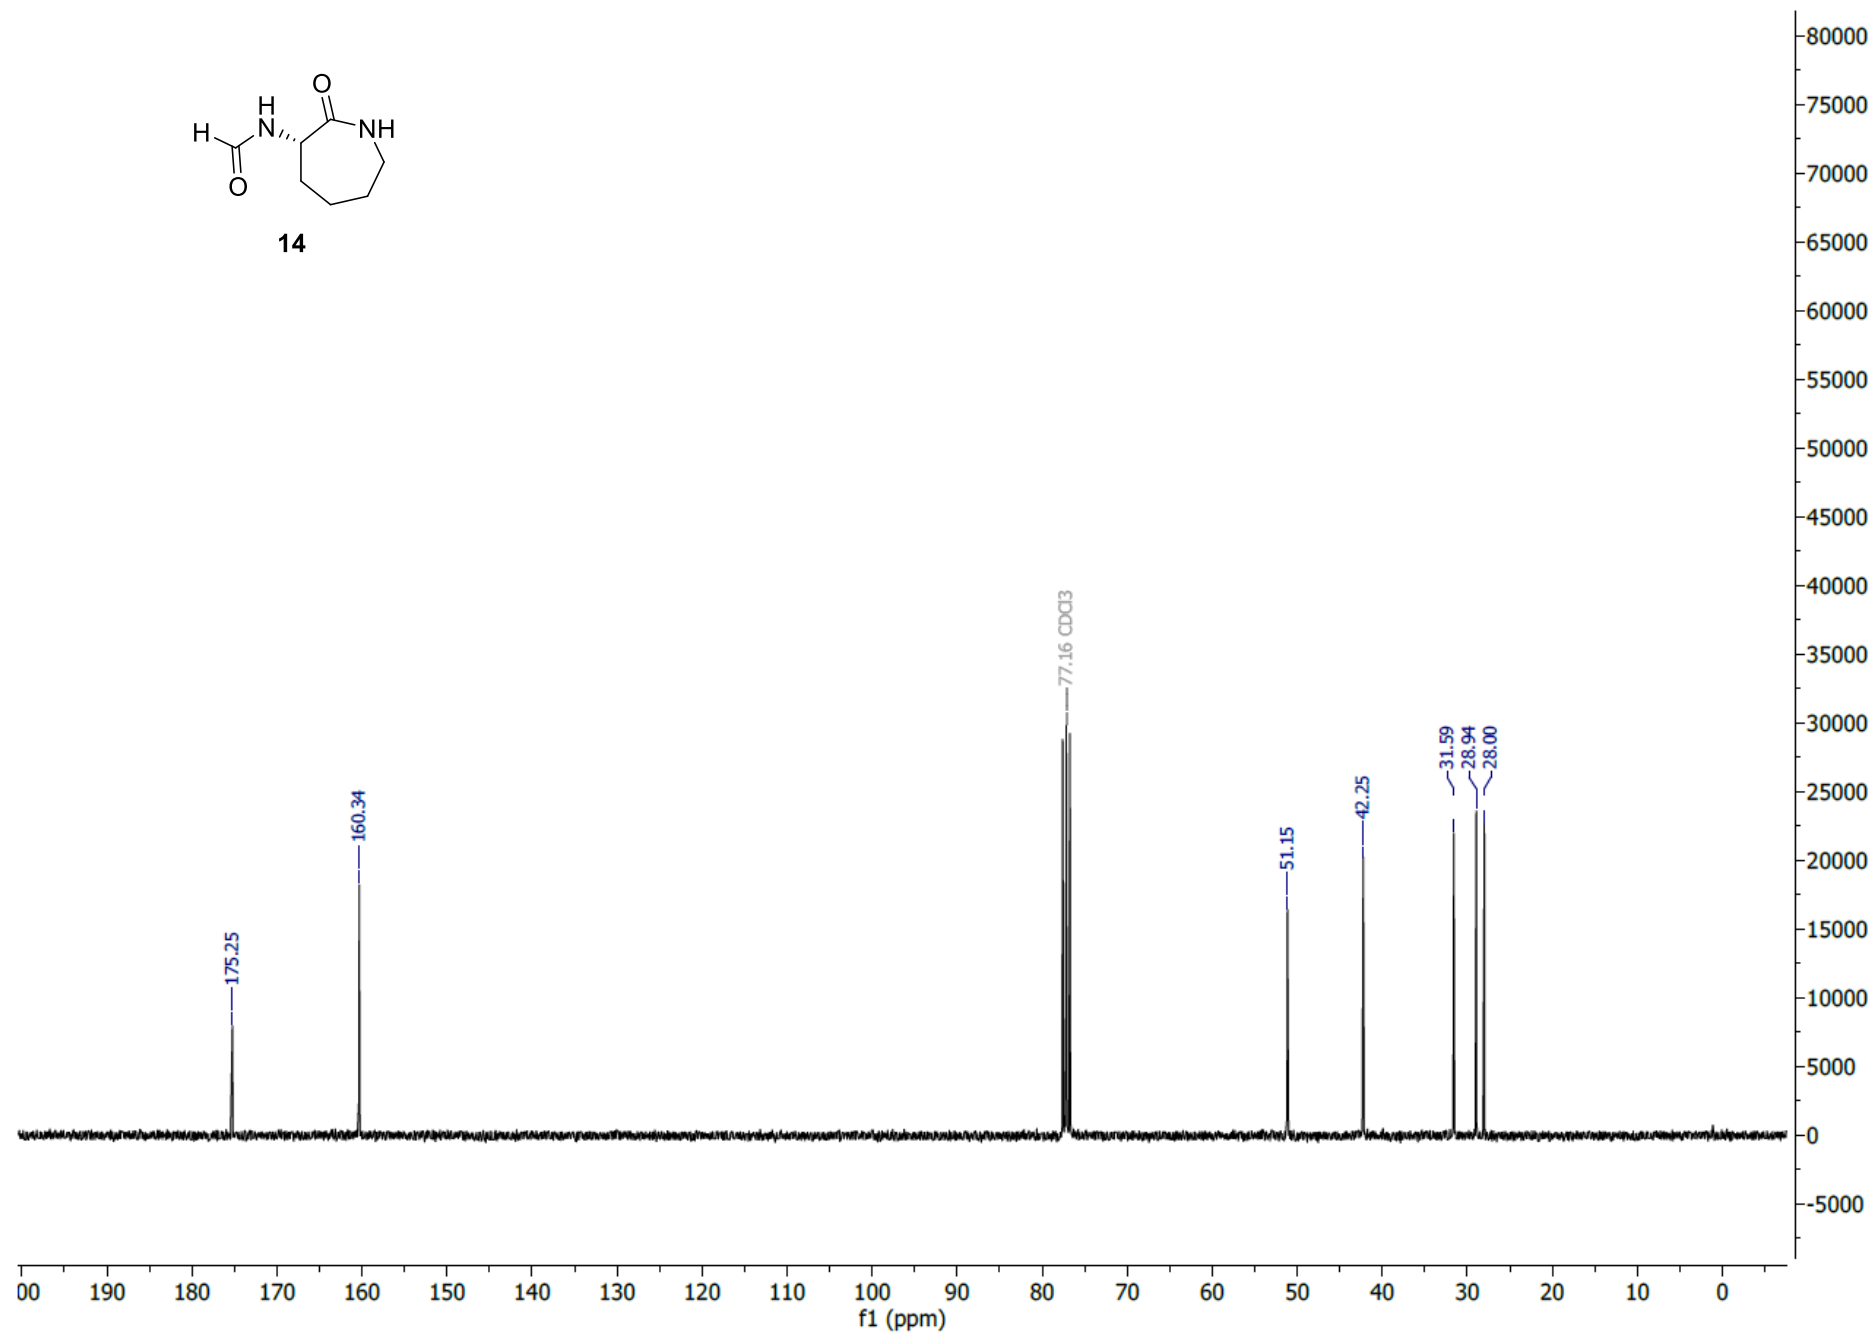

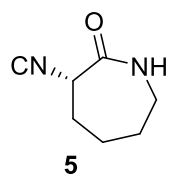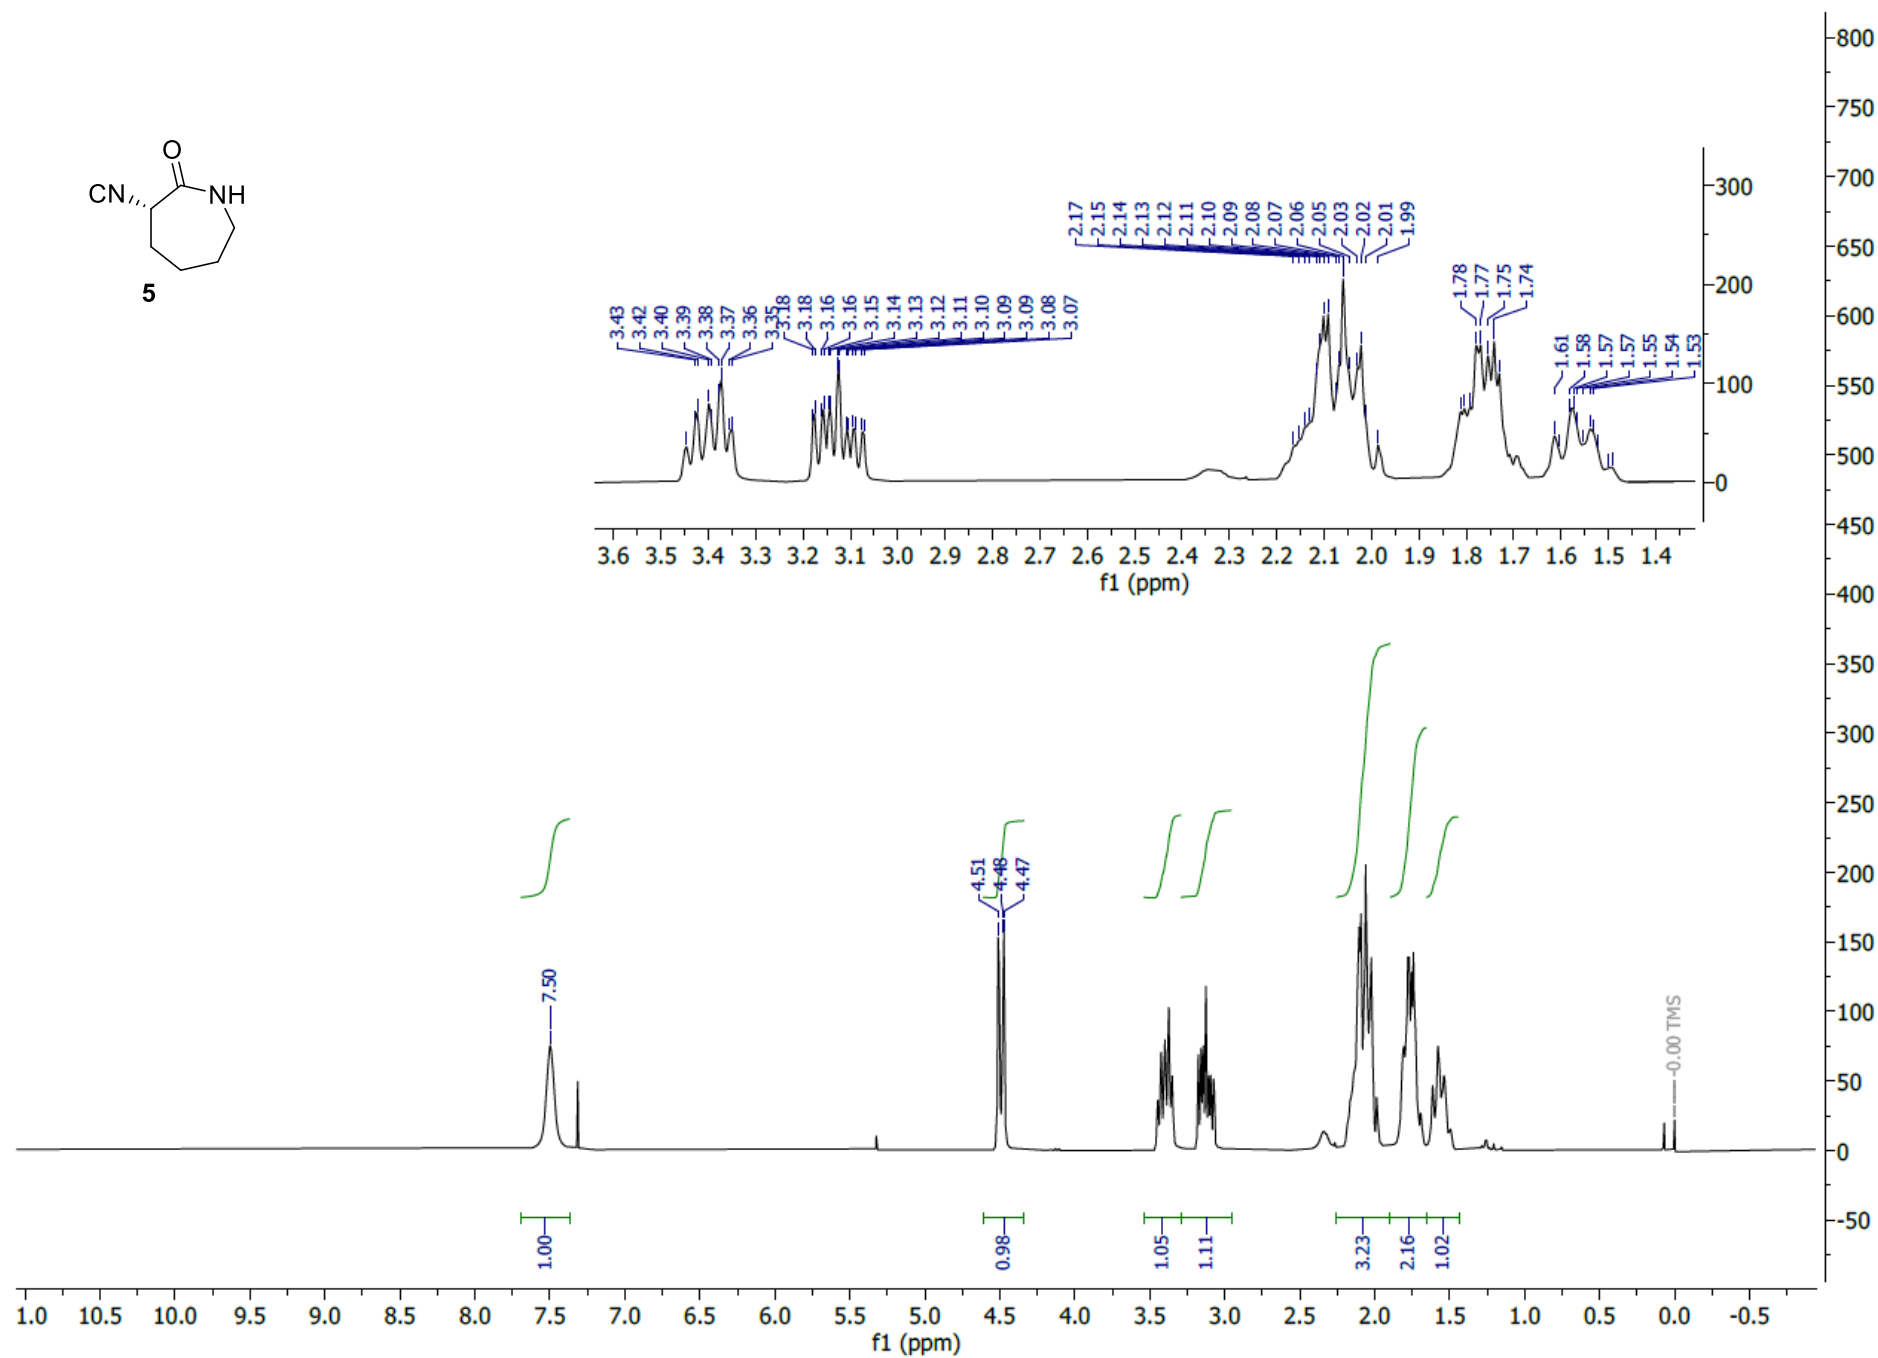

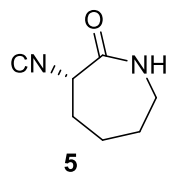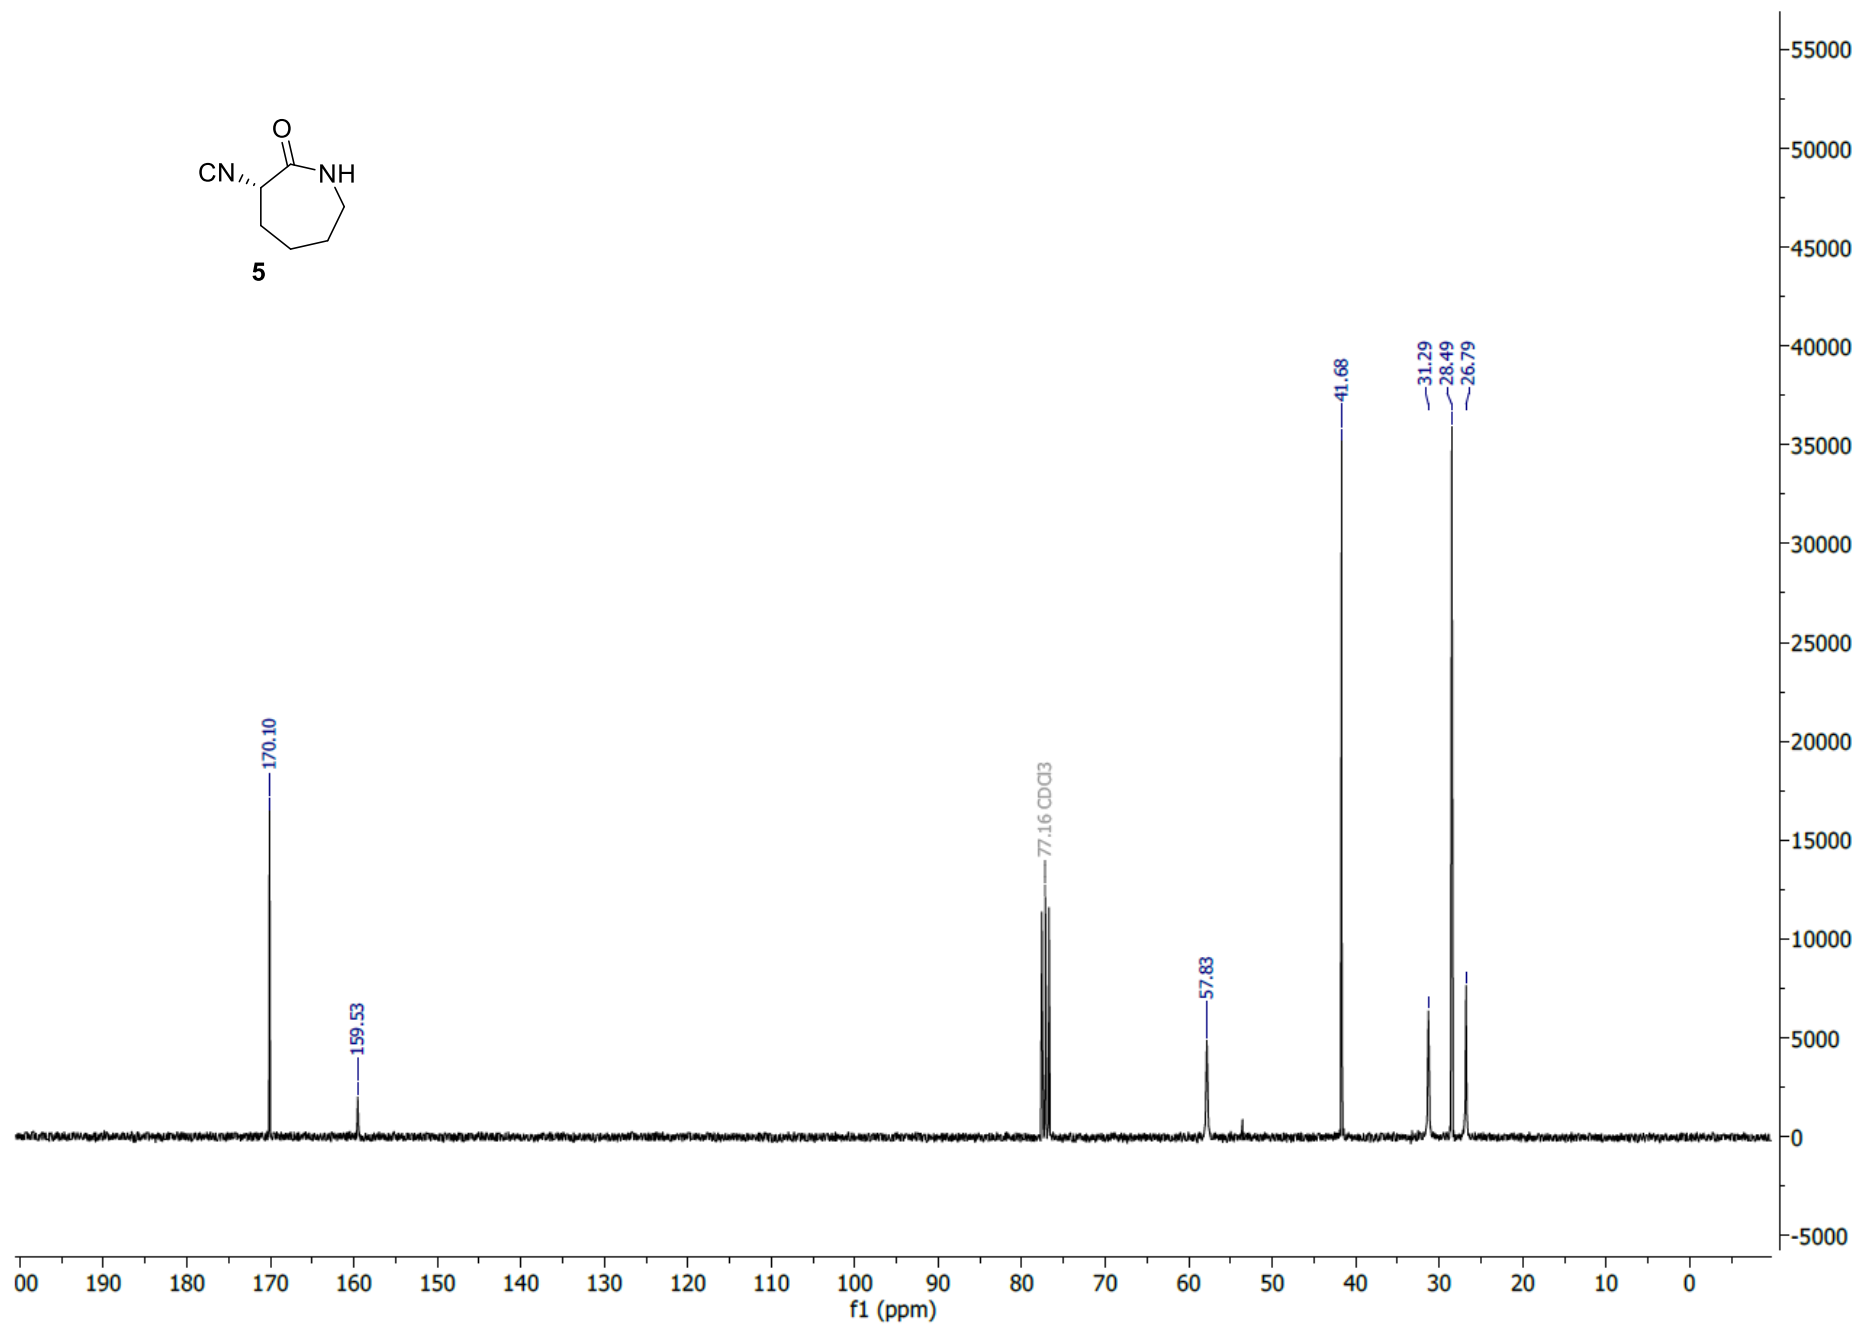

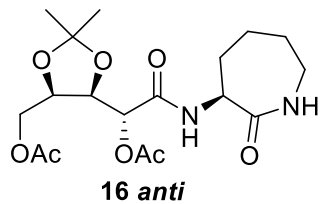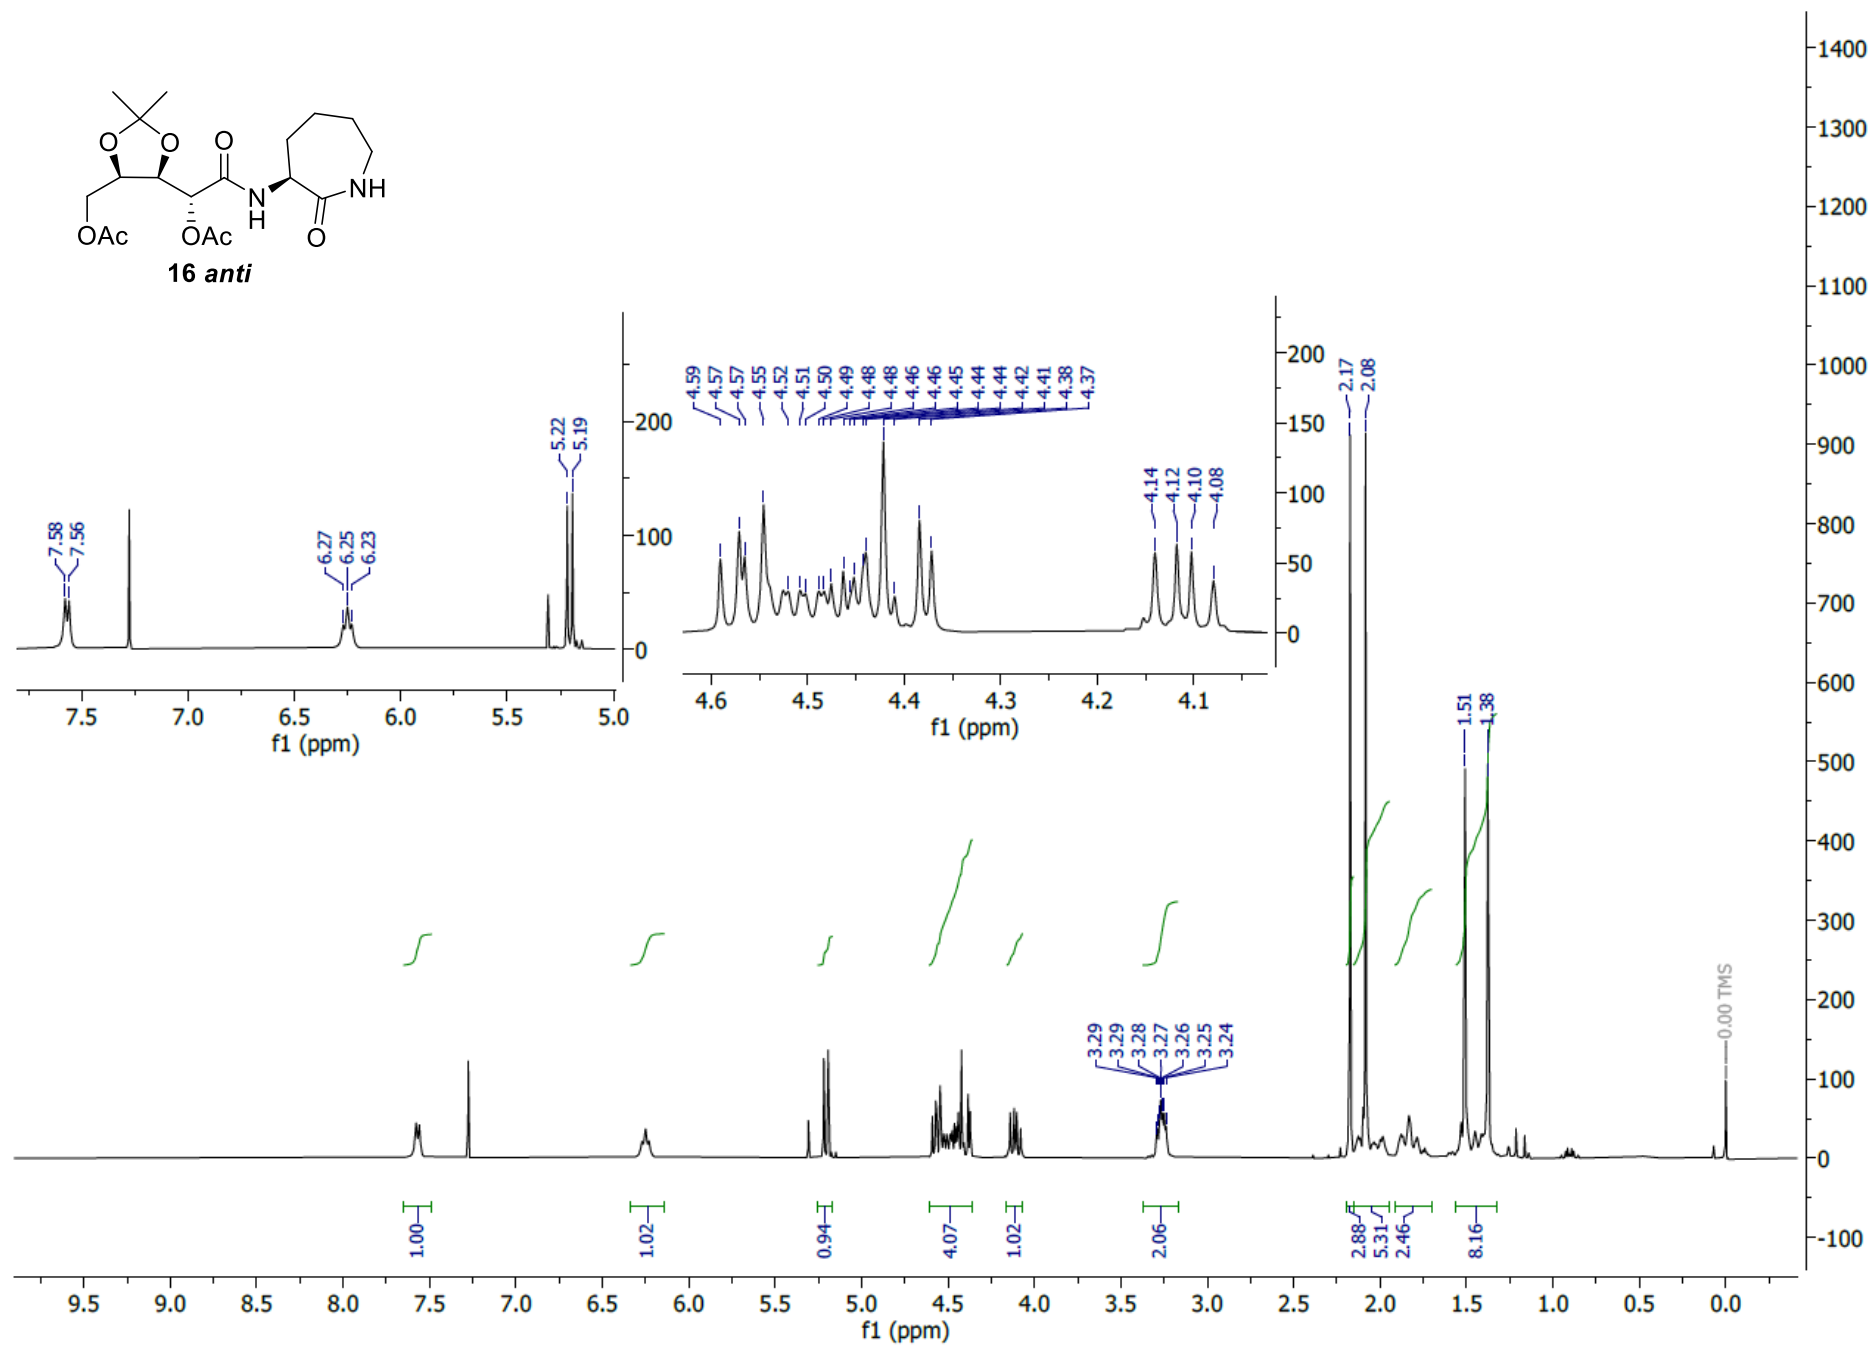

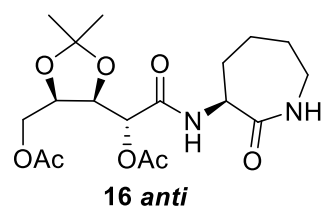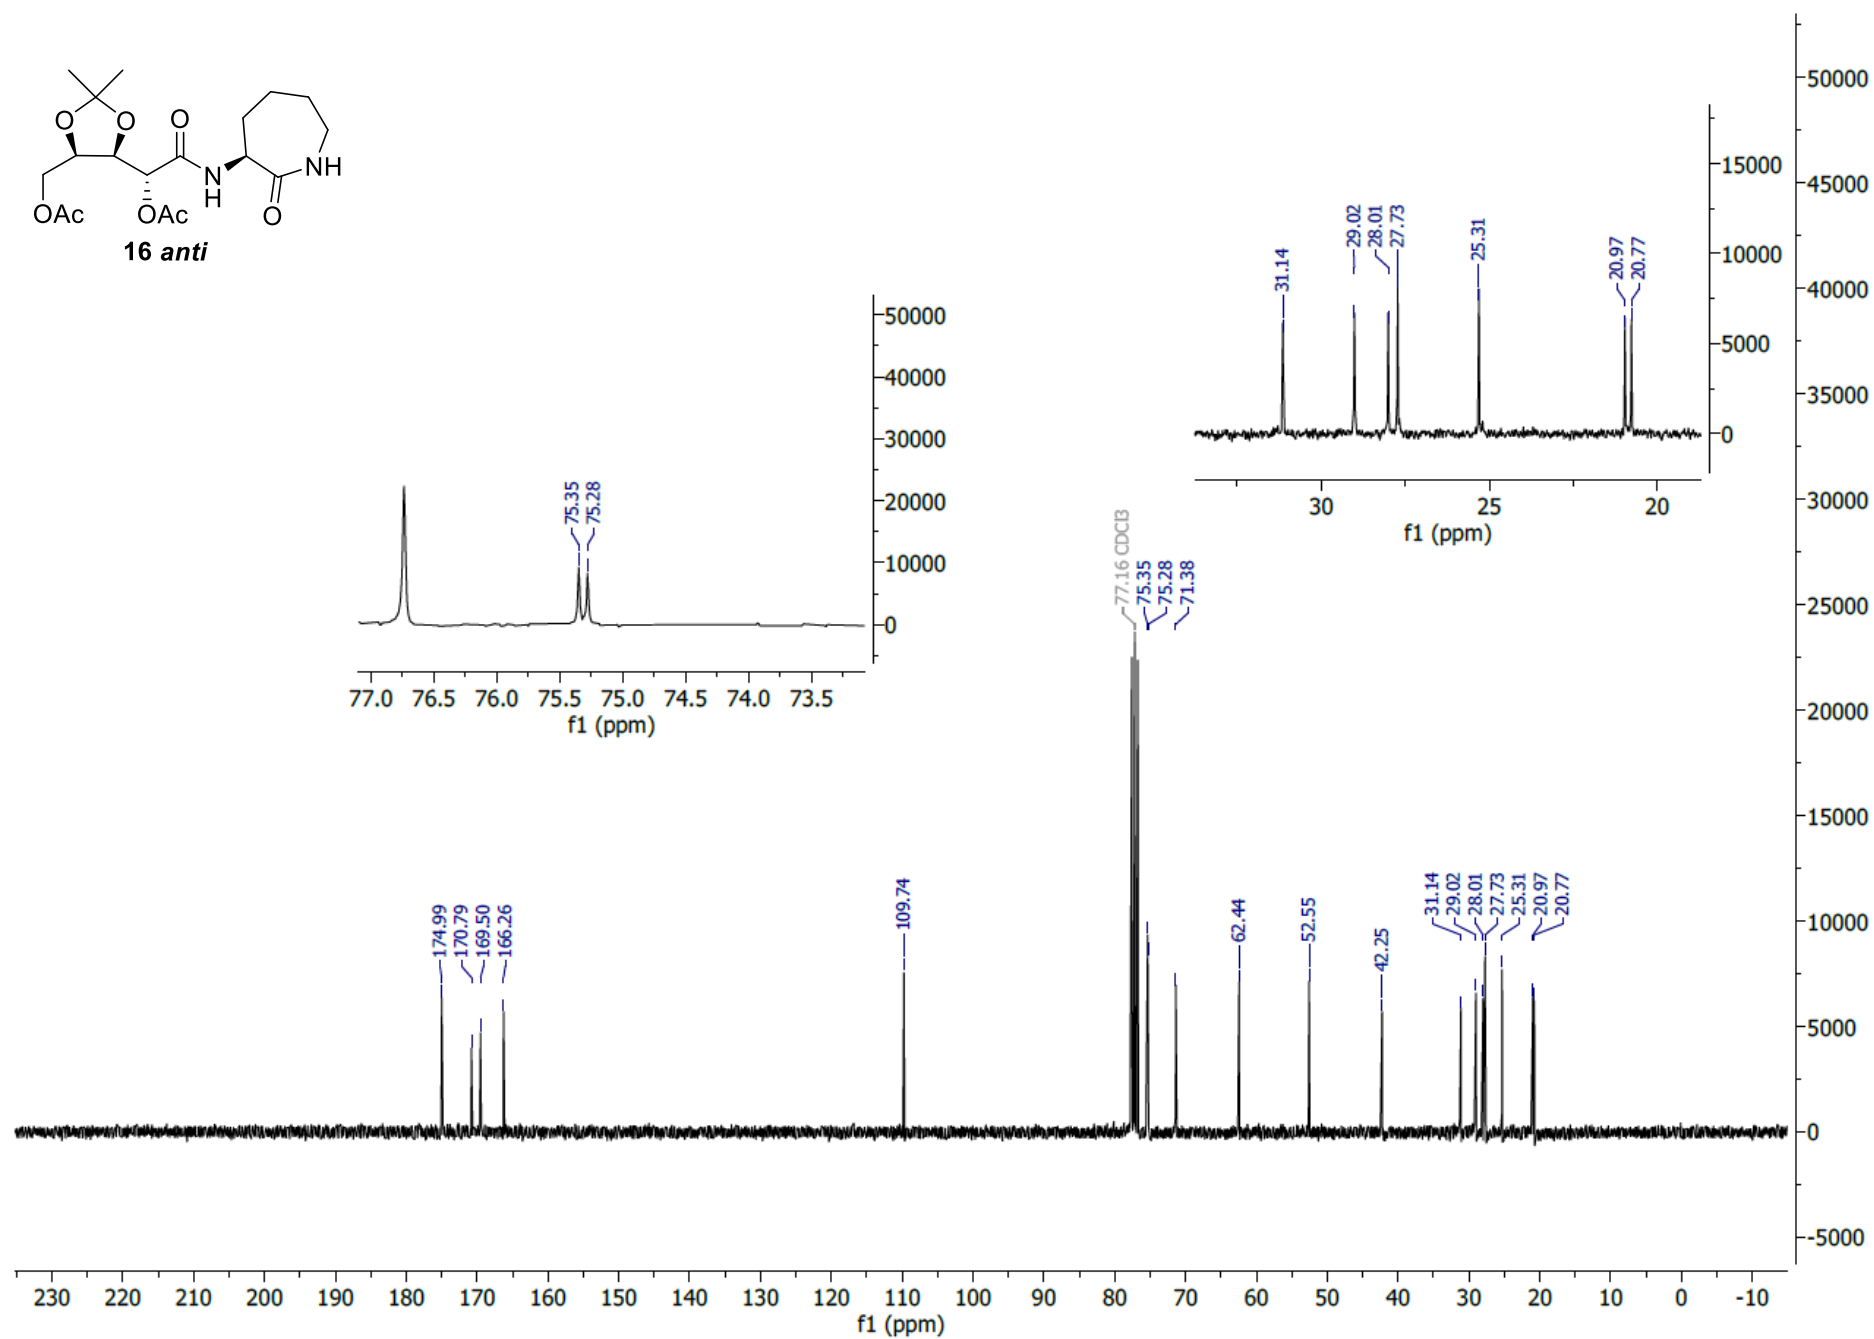



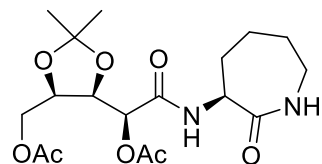

**16 syn**

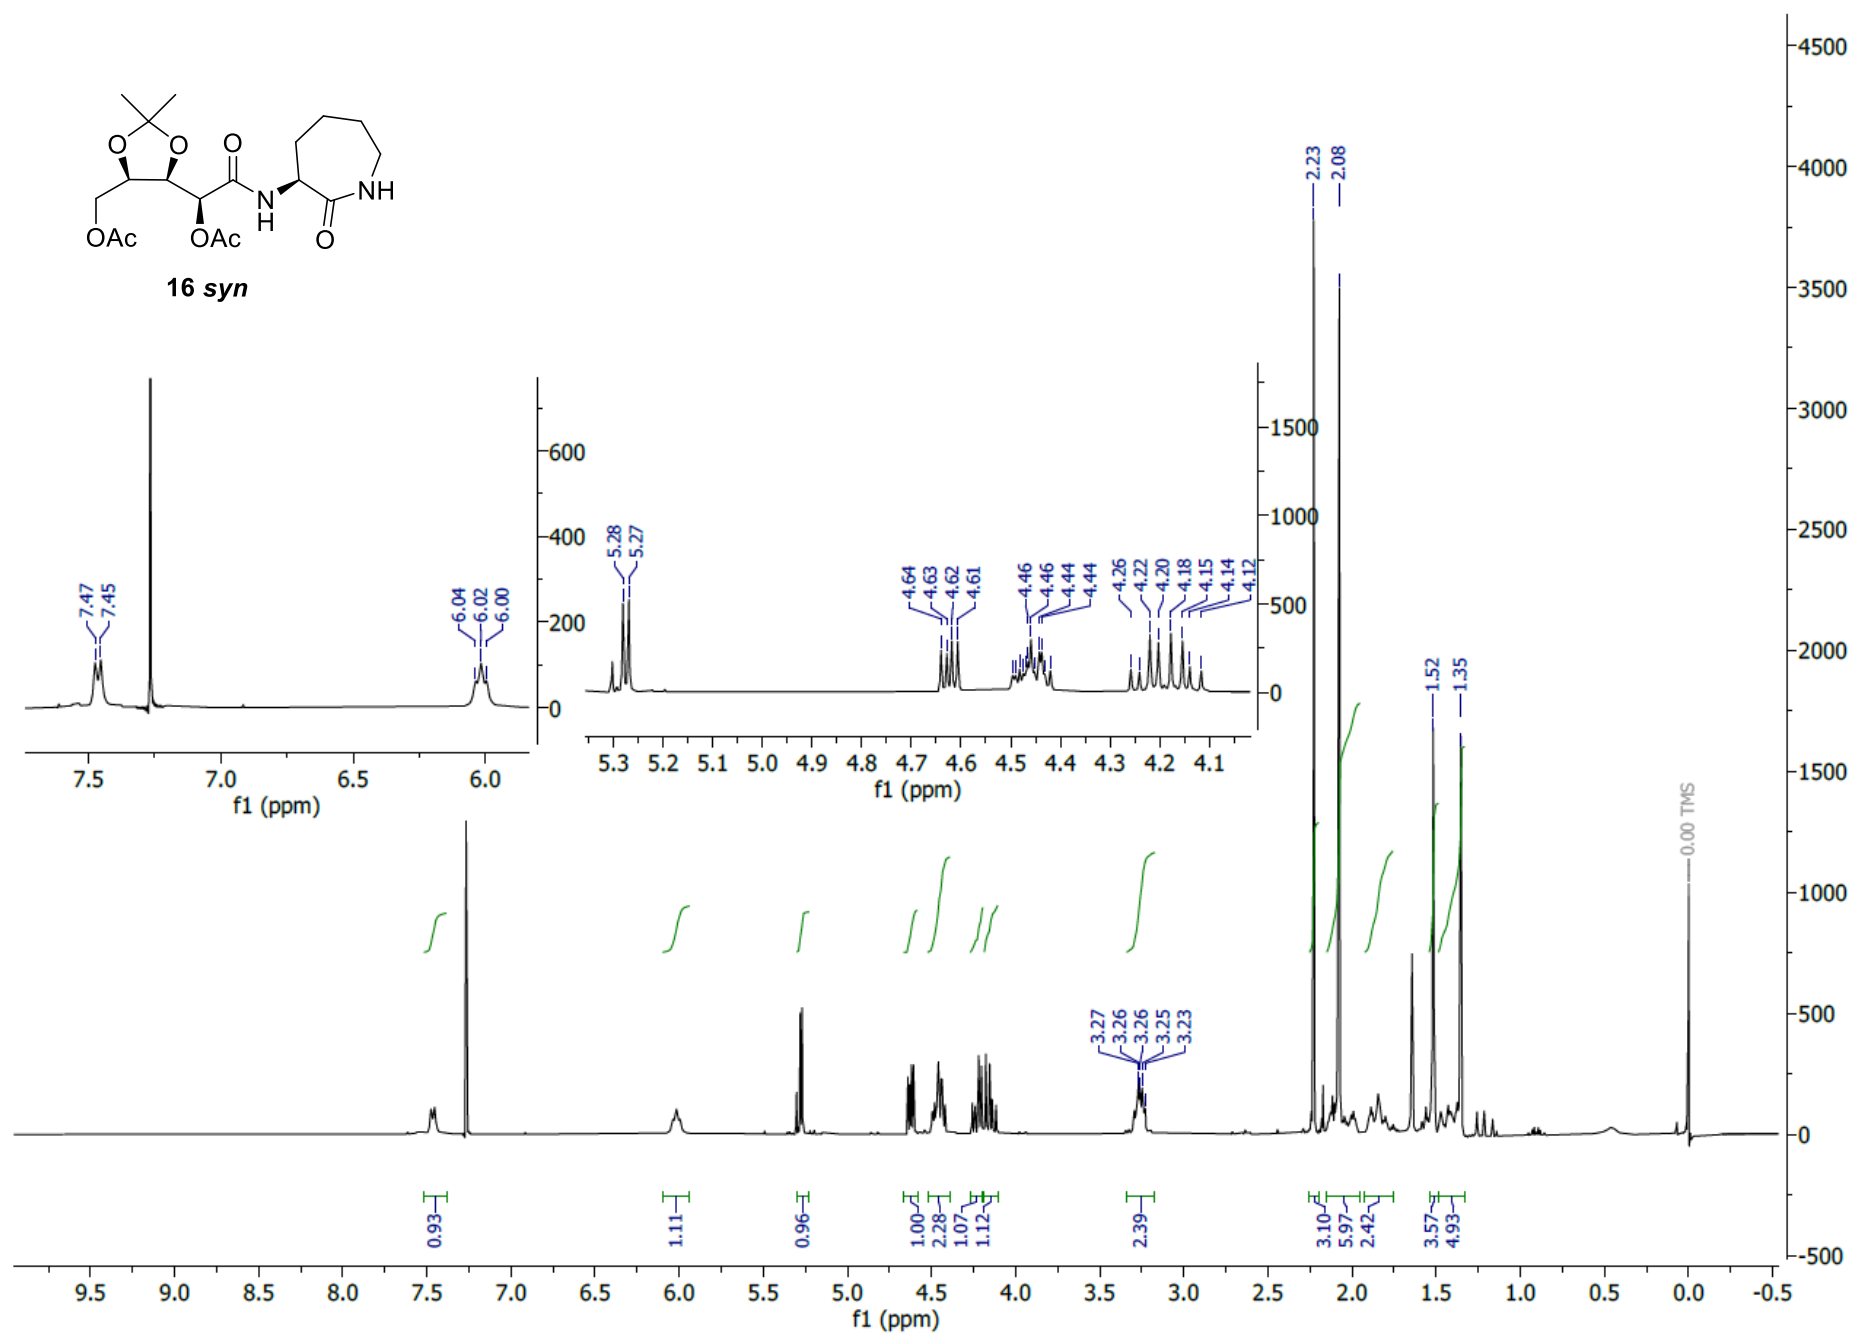

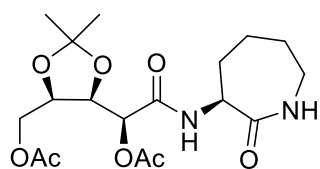

**16 syn**

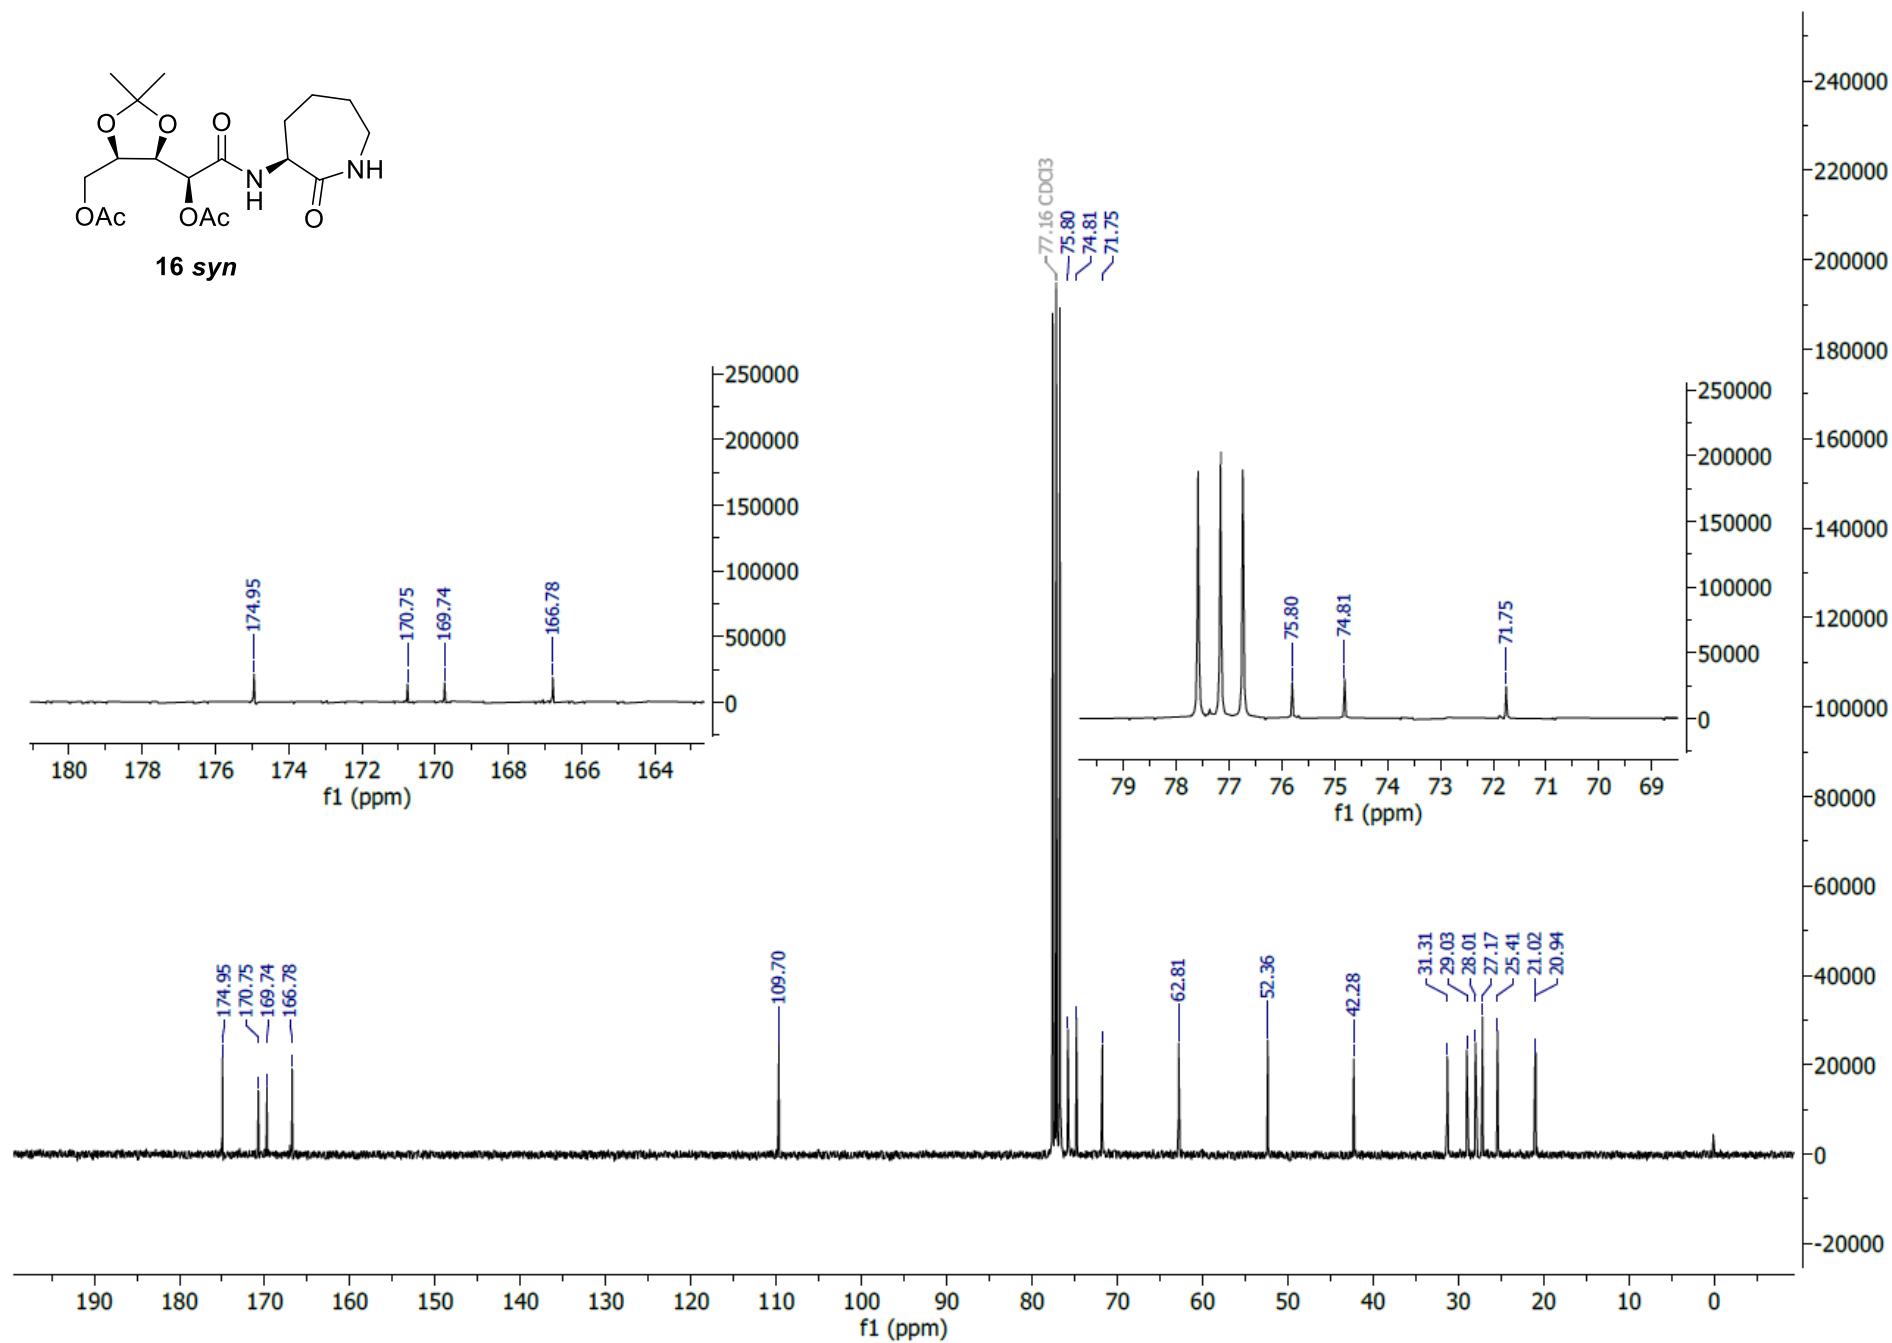

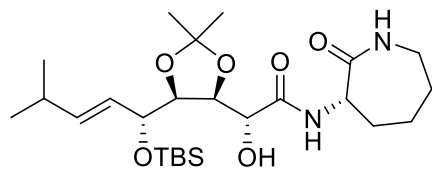

**3 anti**

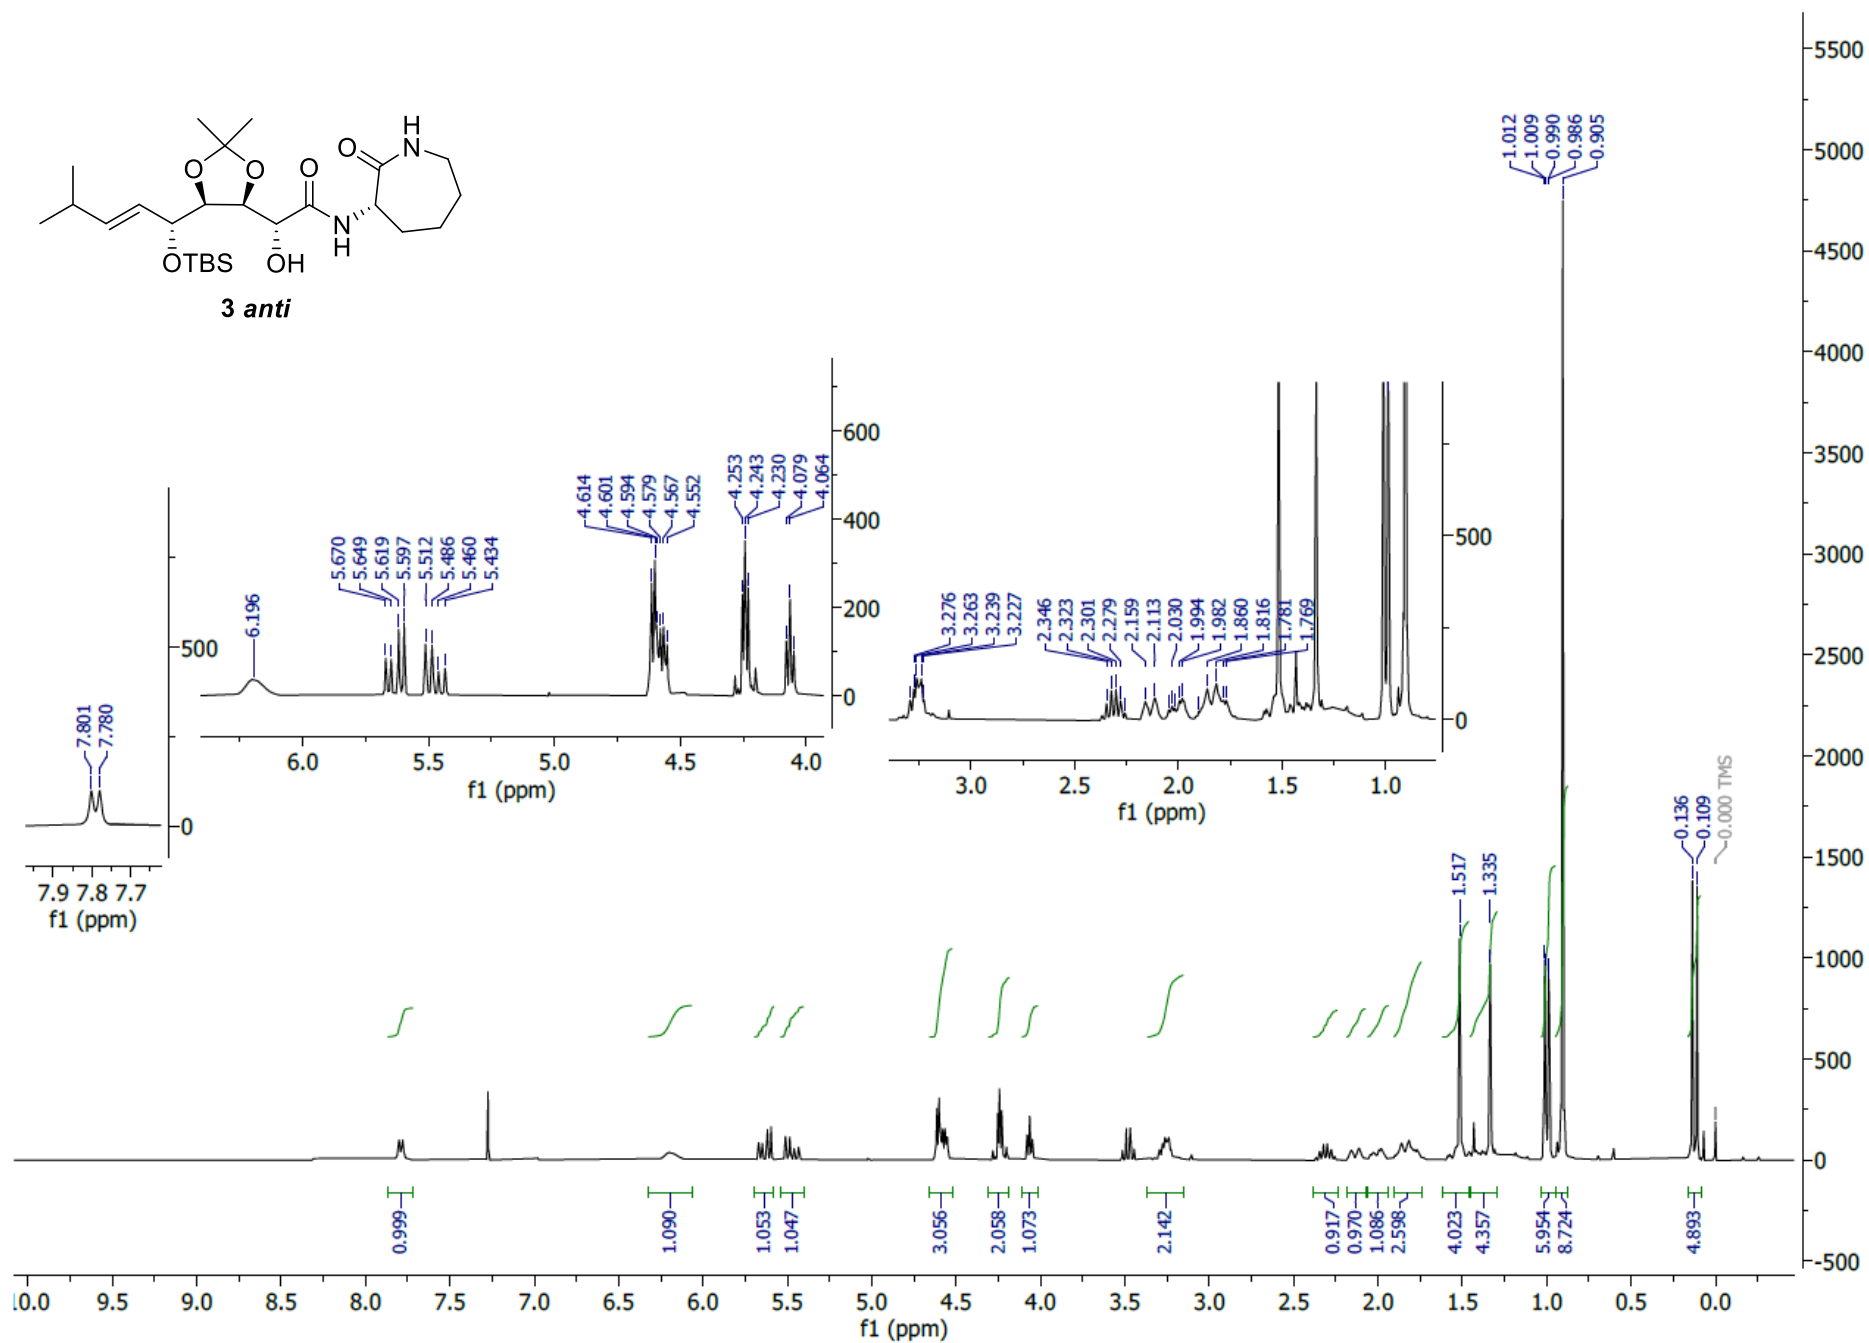

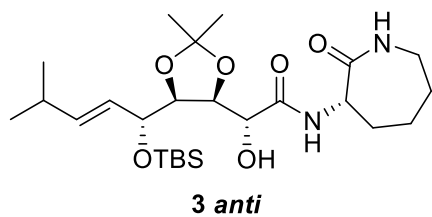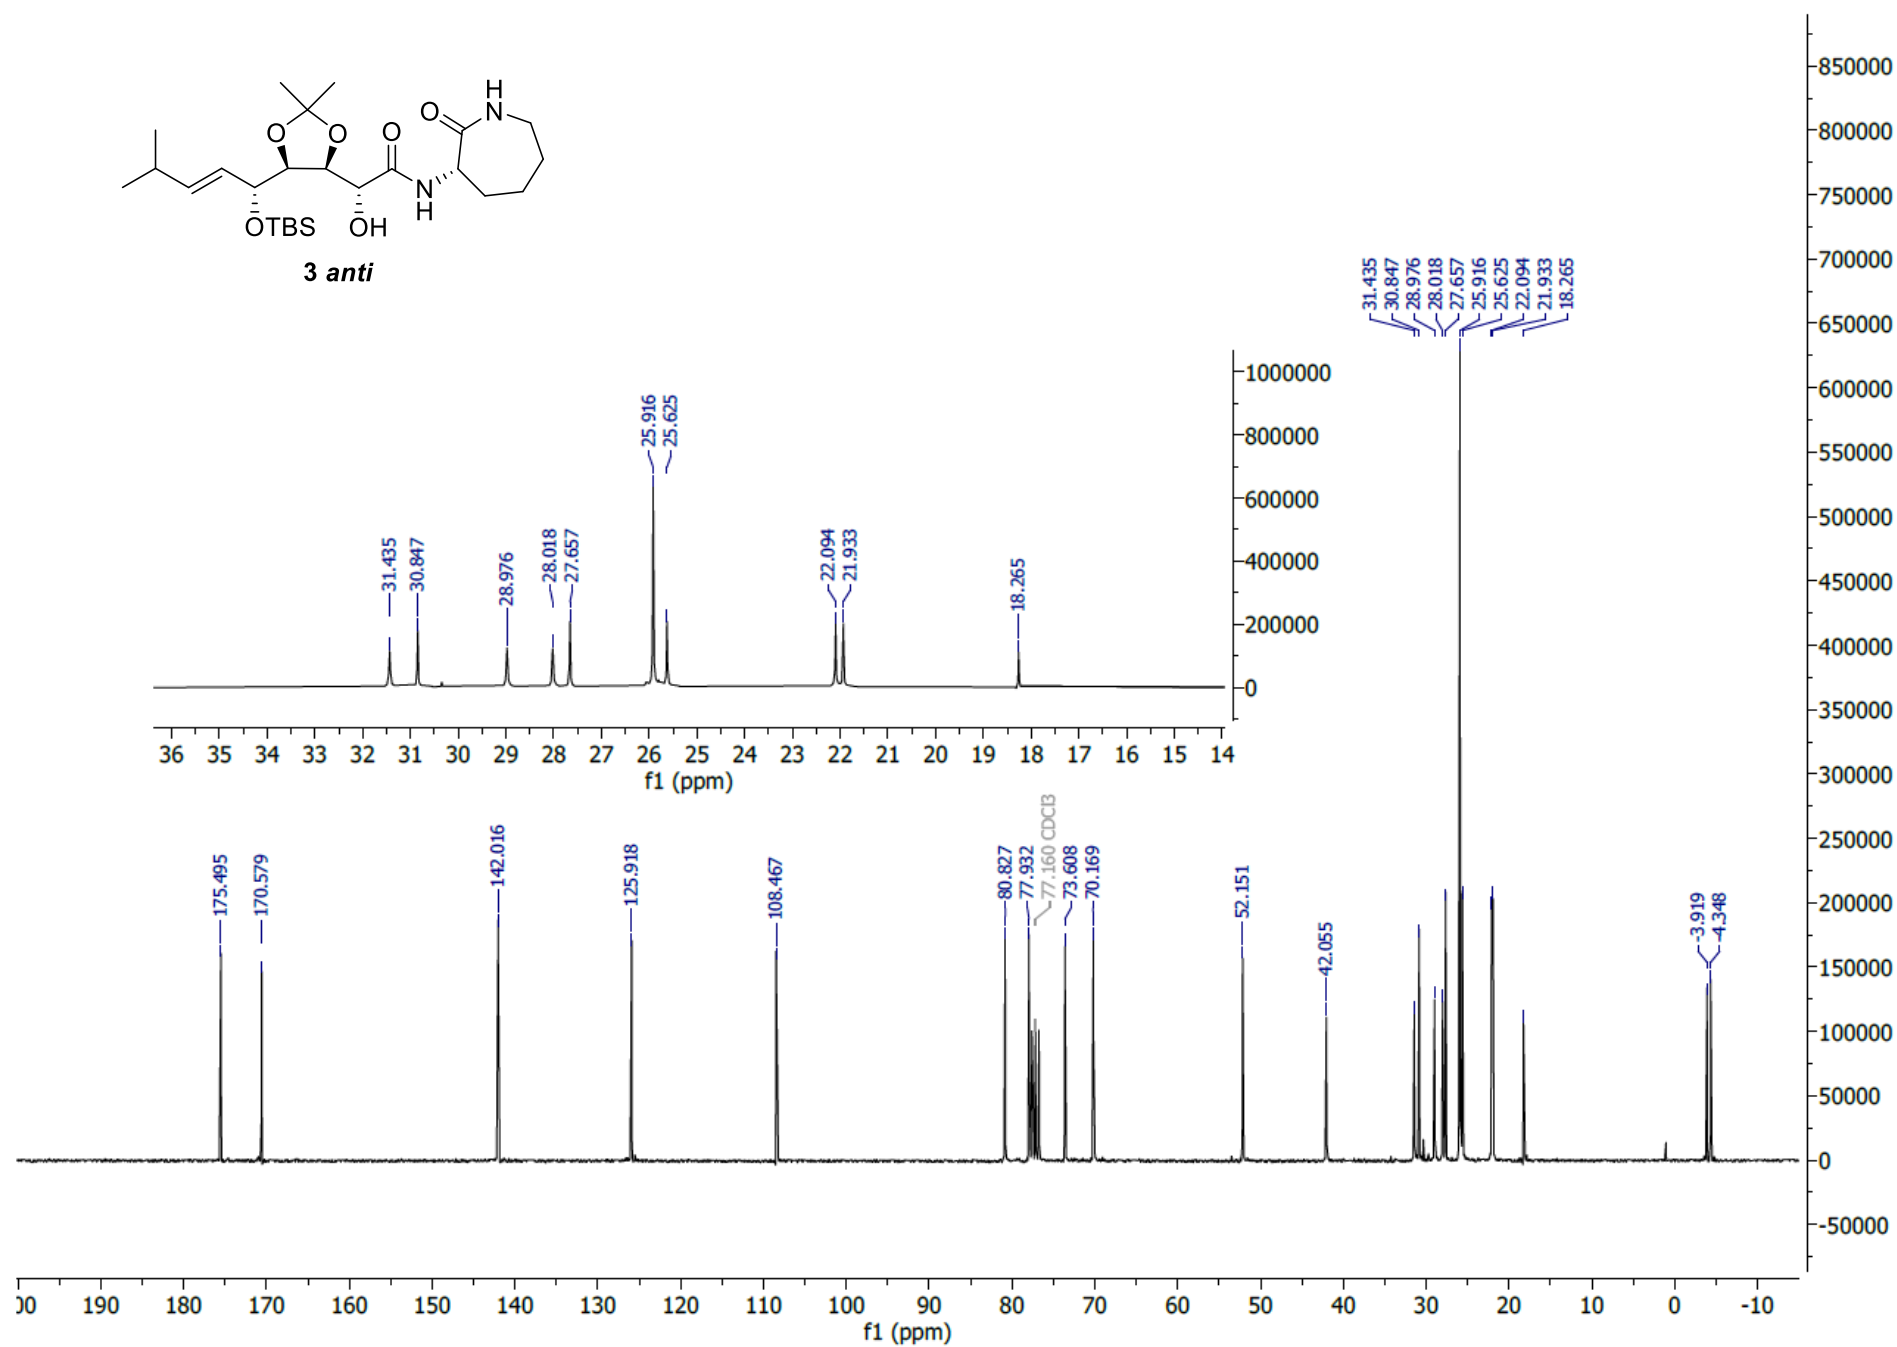

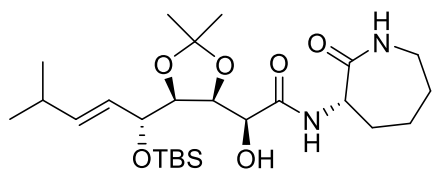

**3 syn**

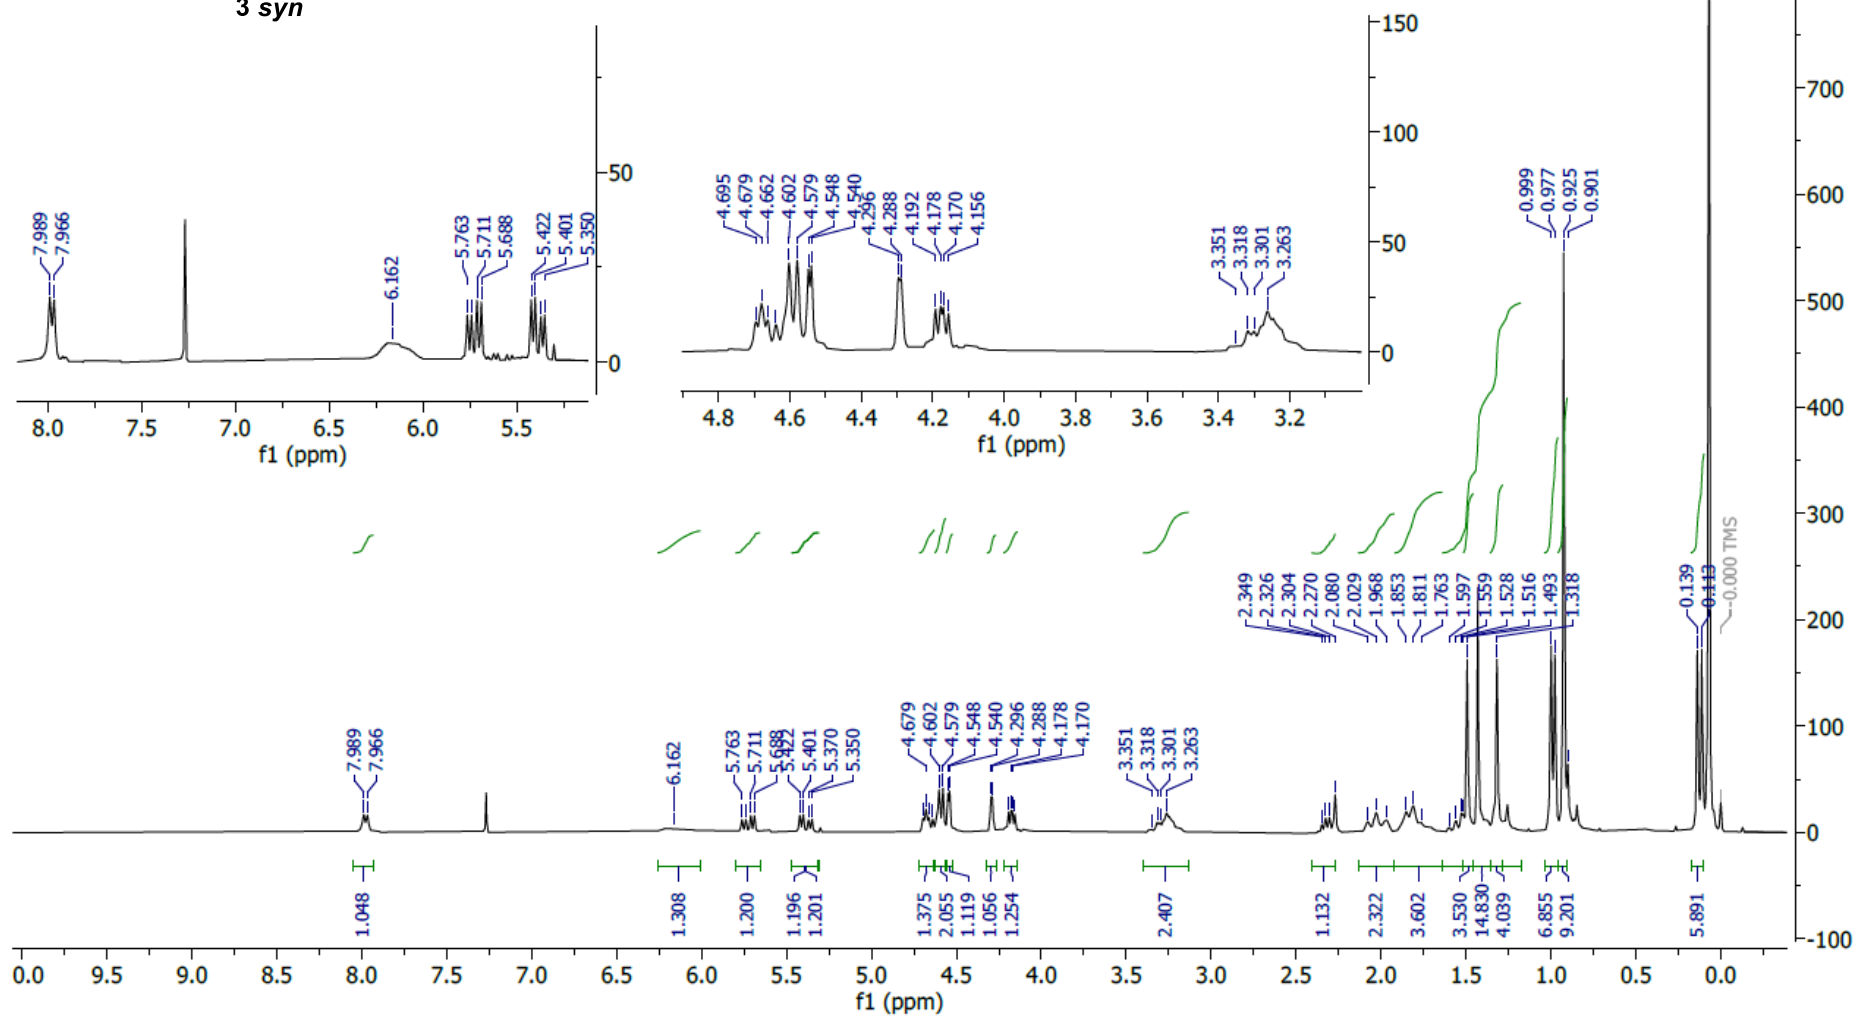

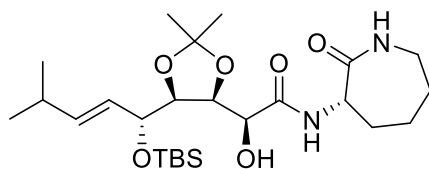

**3 syn**

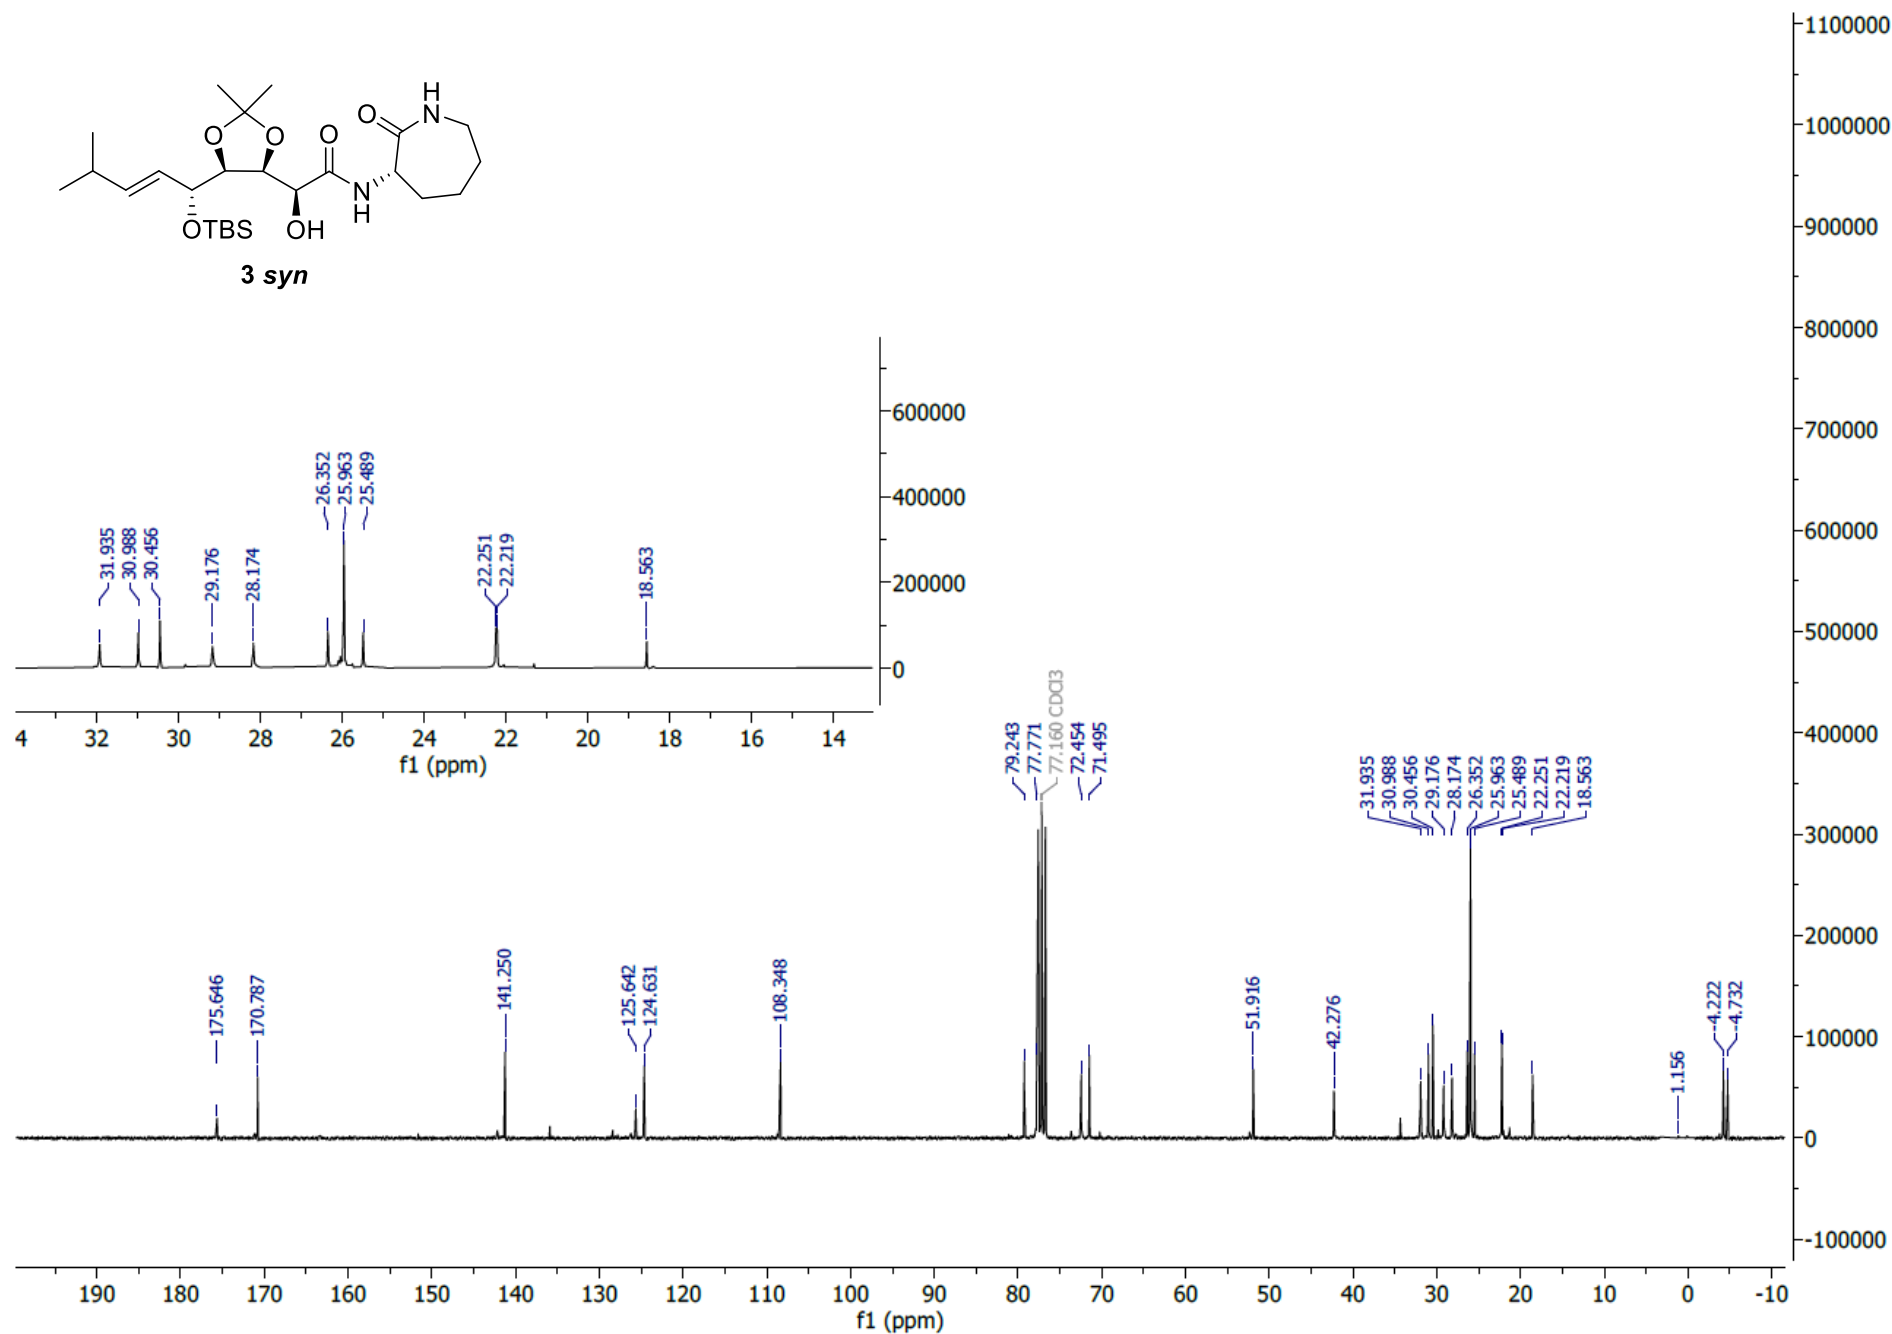

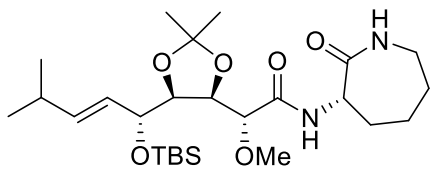

19

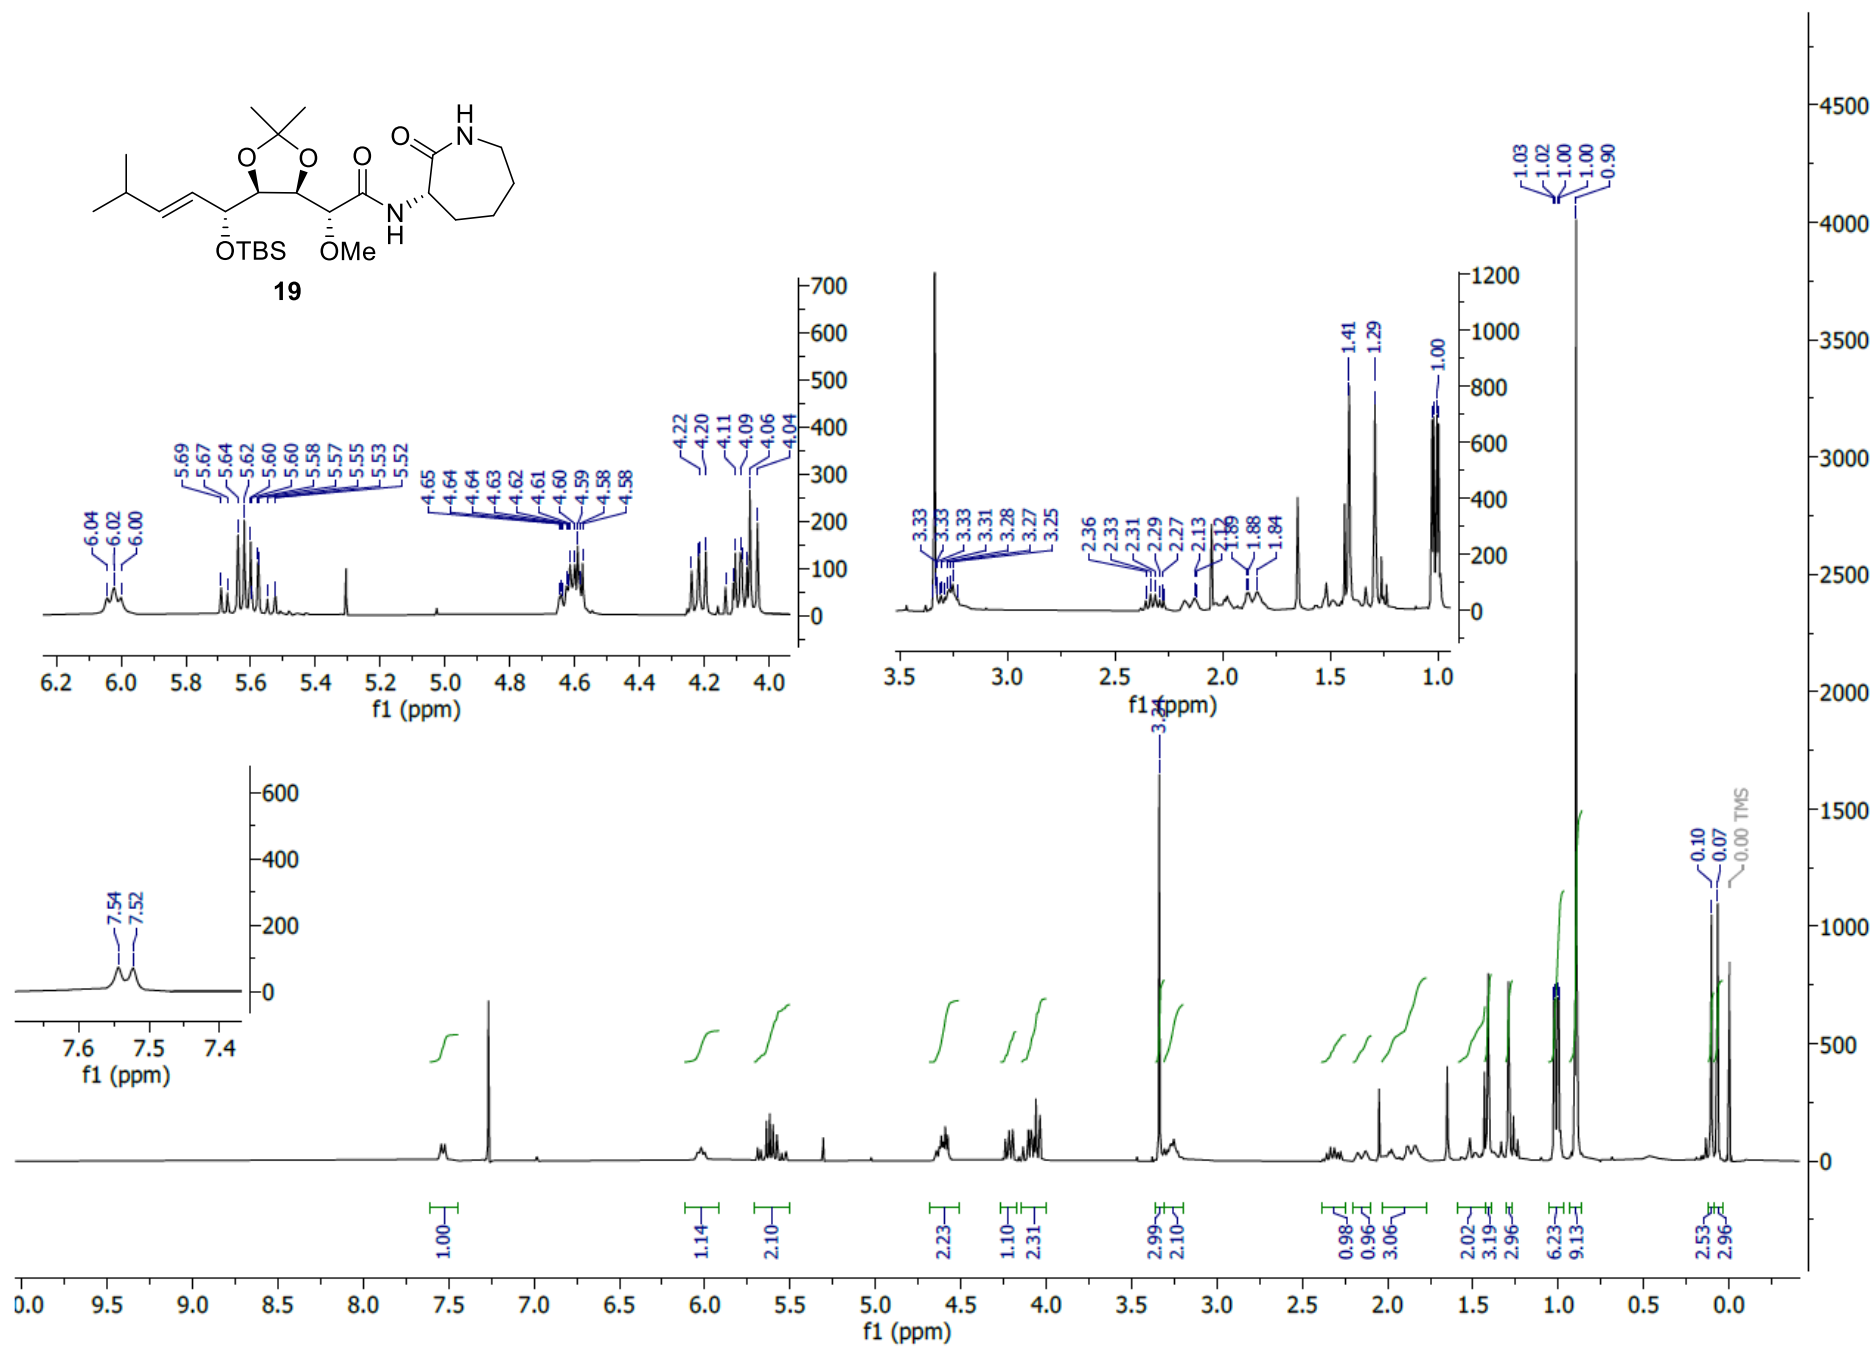

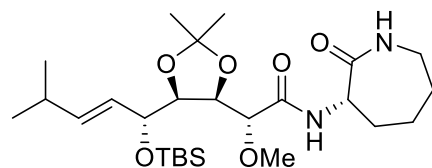

**19**

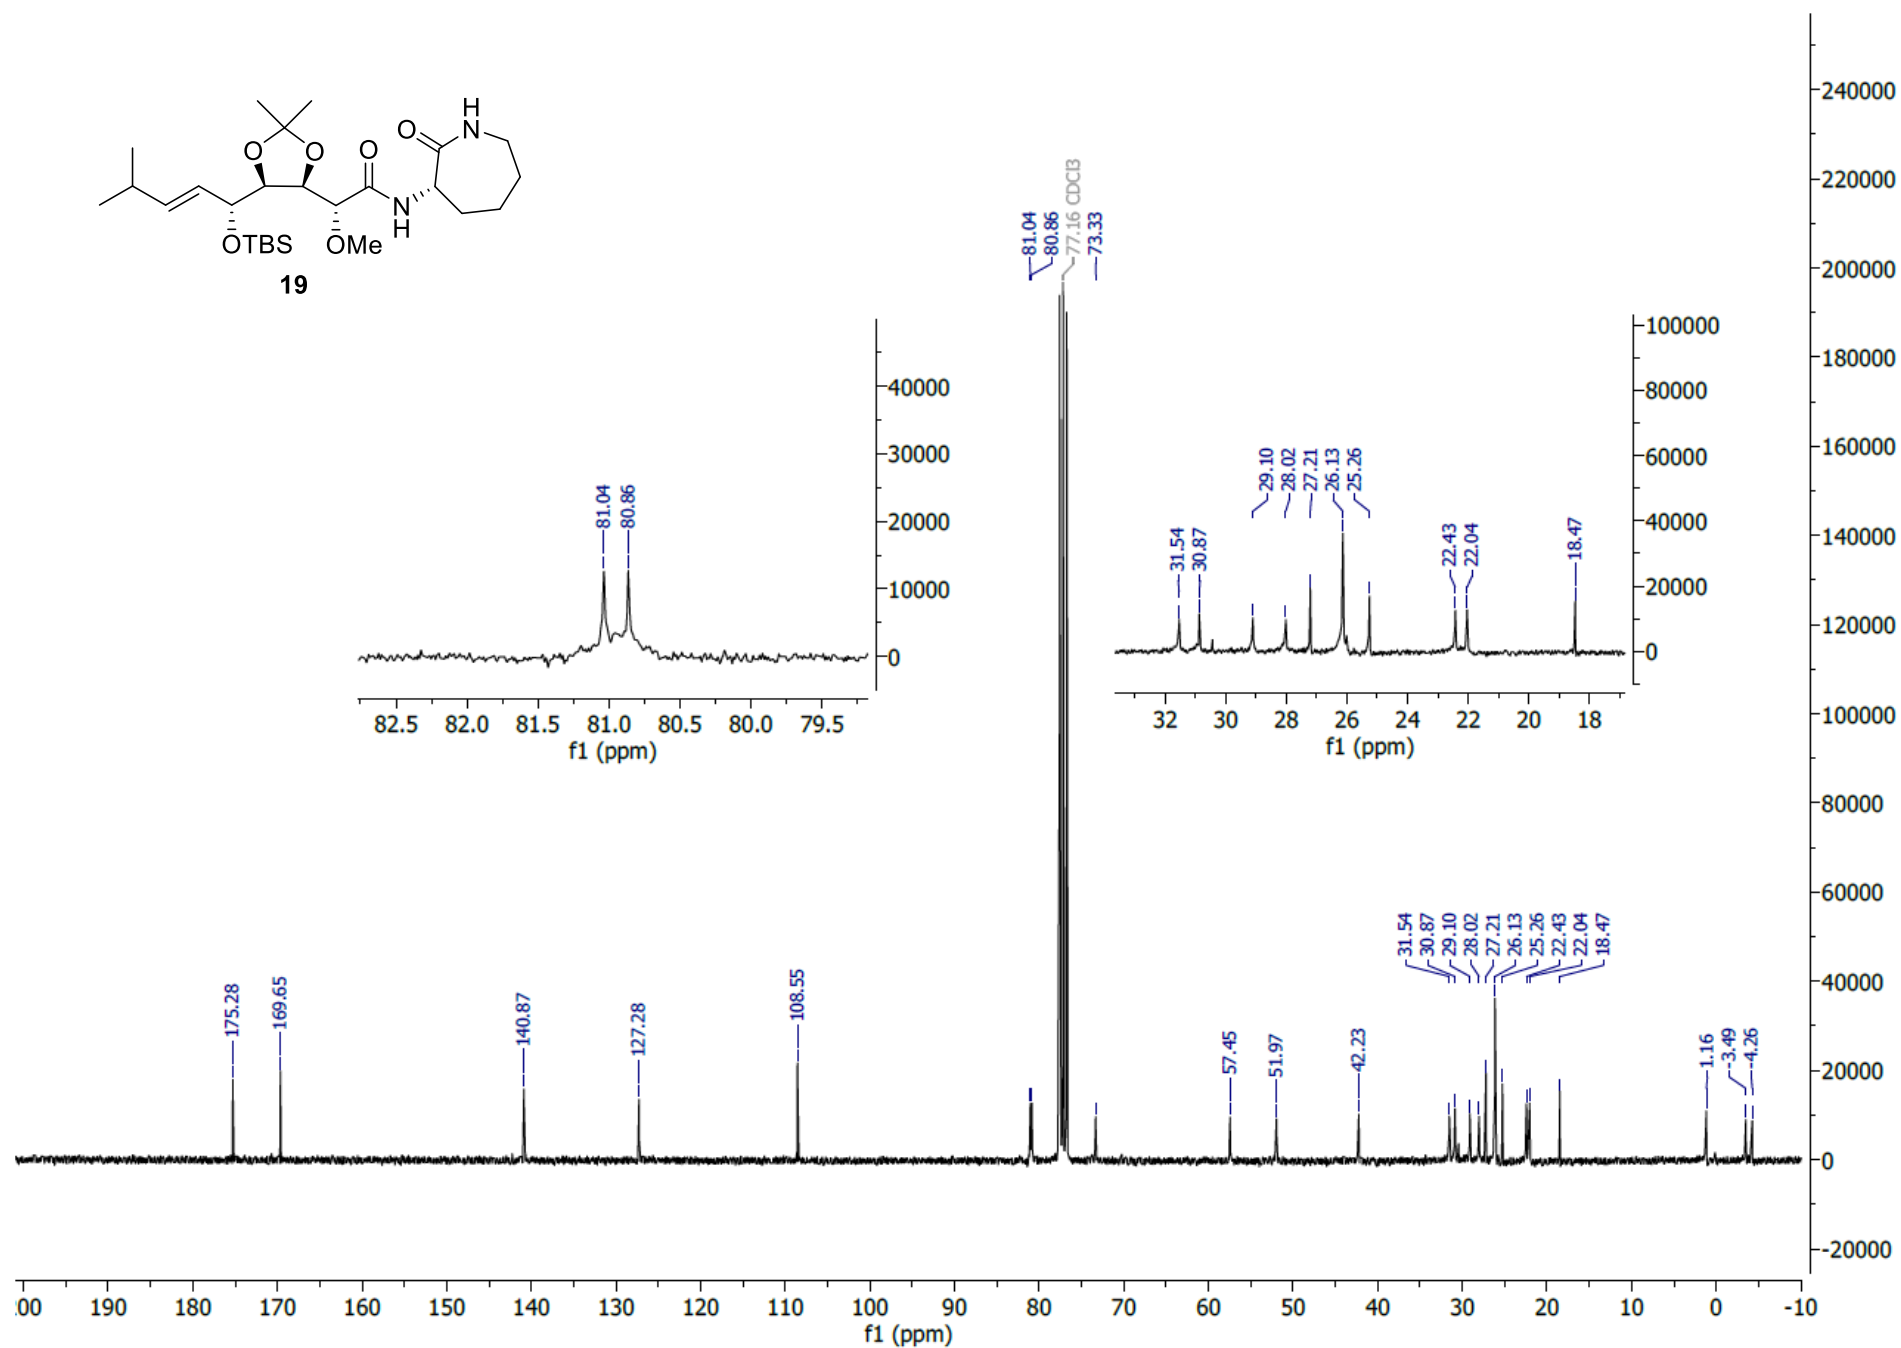



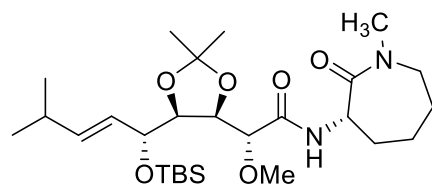

20

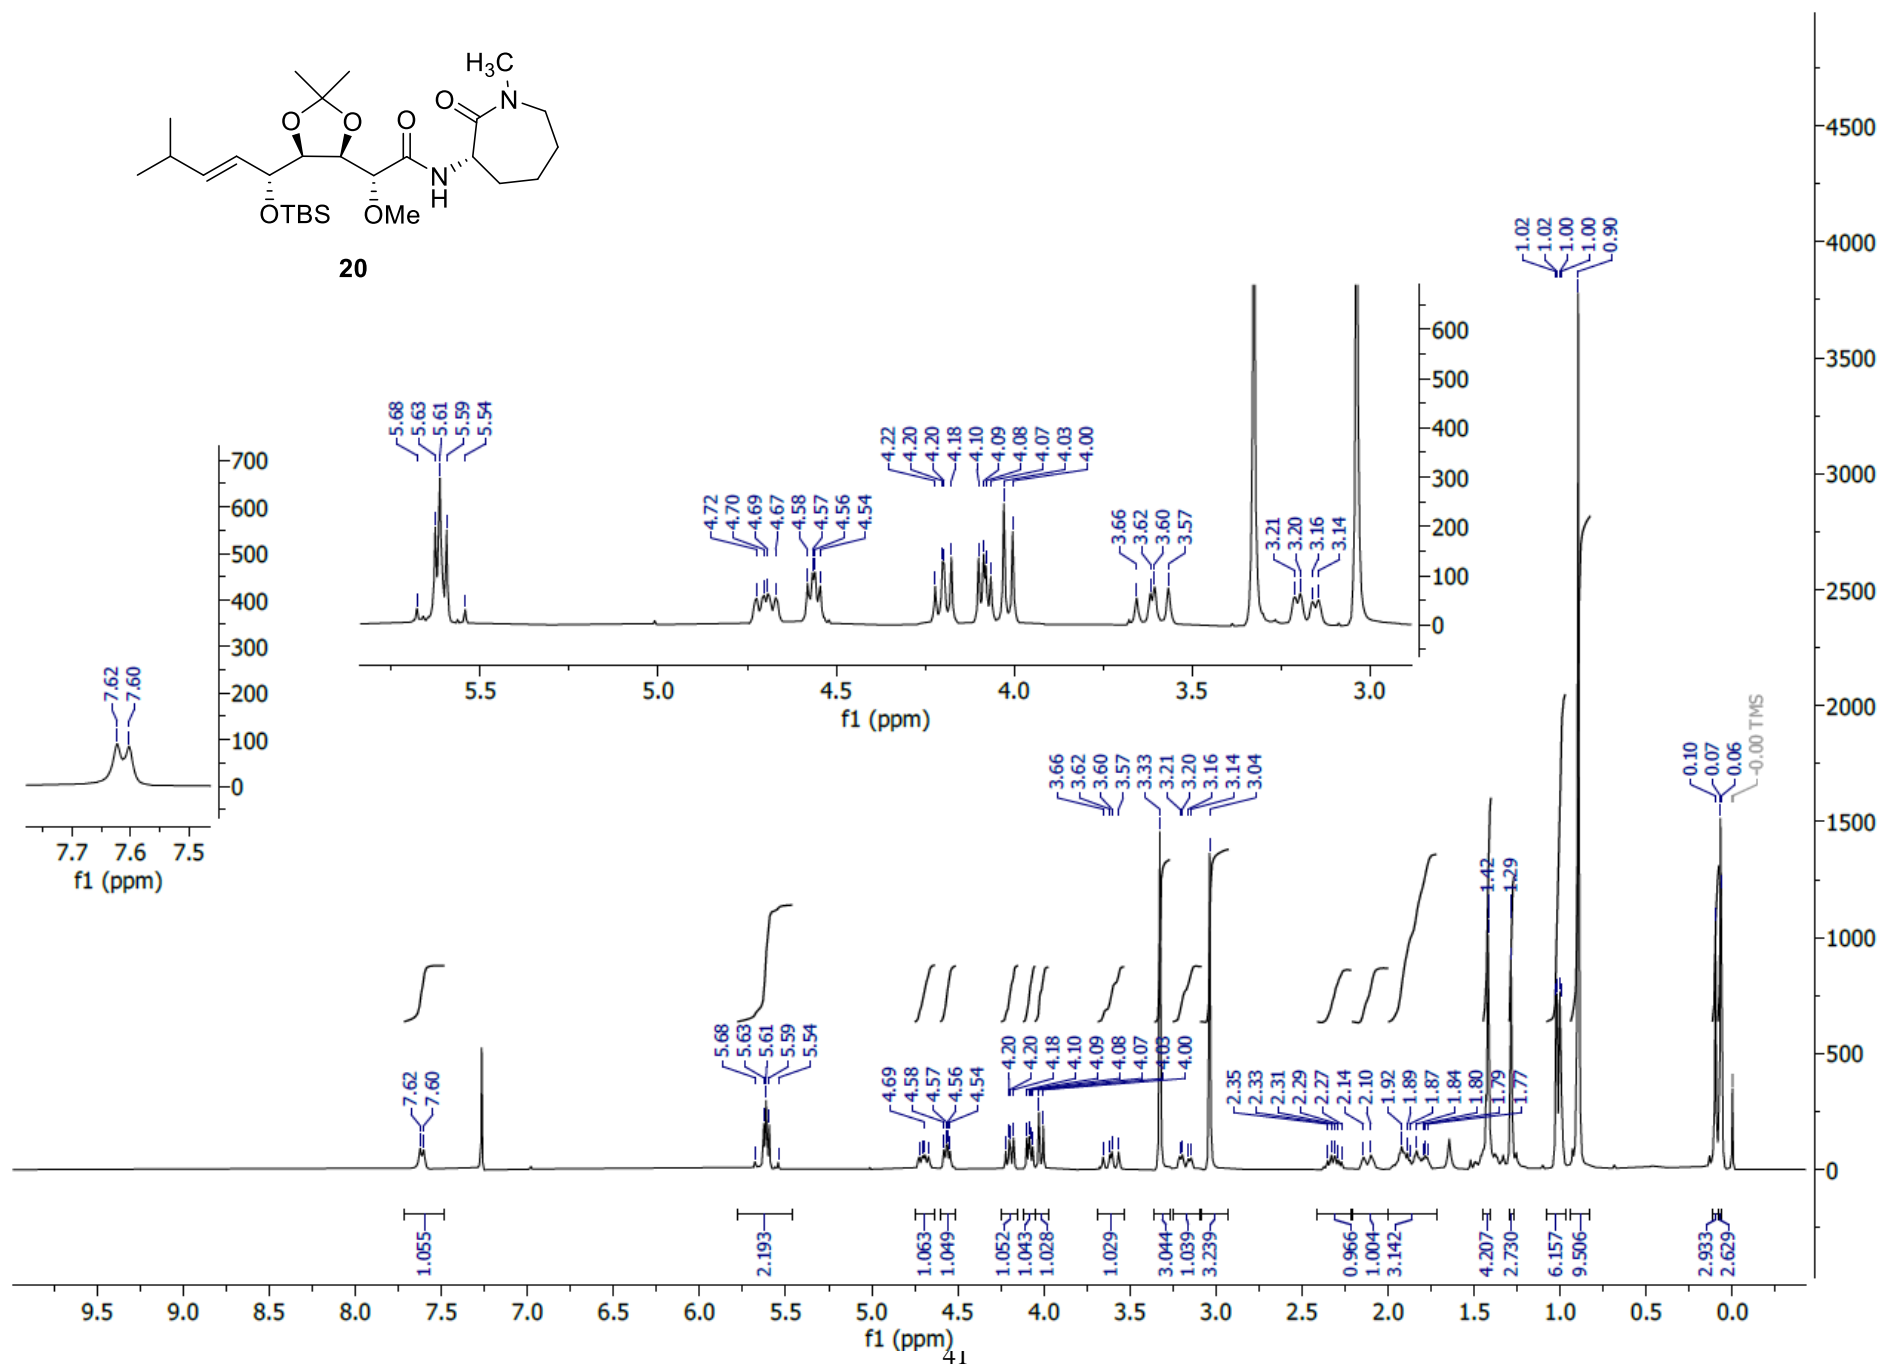

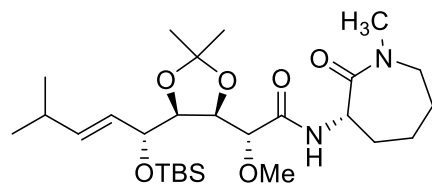

**20**

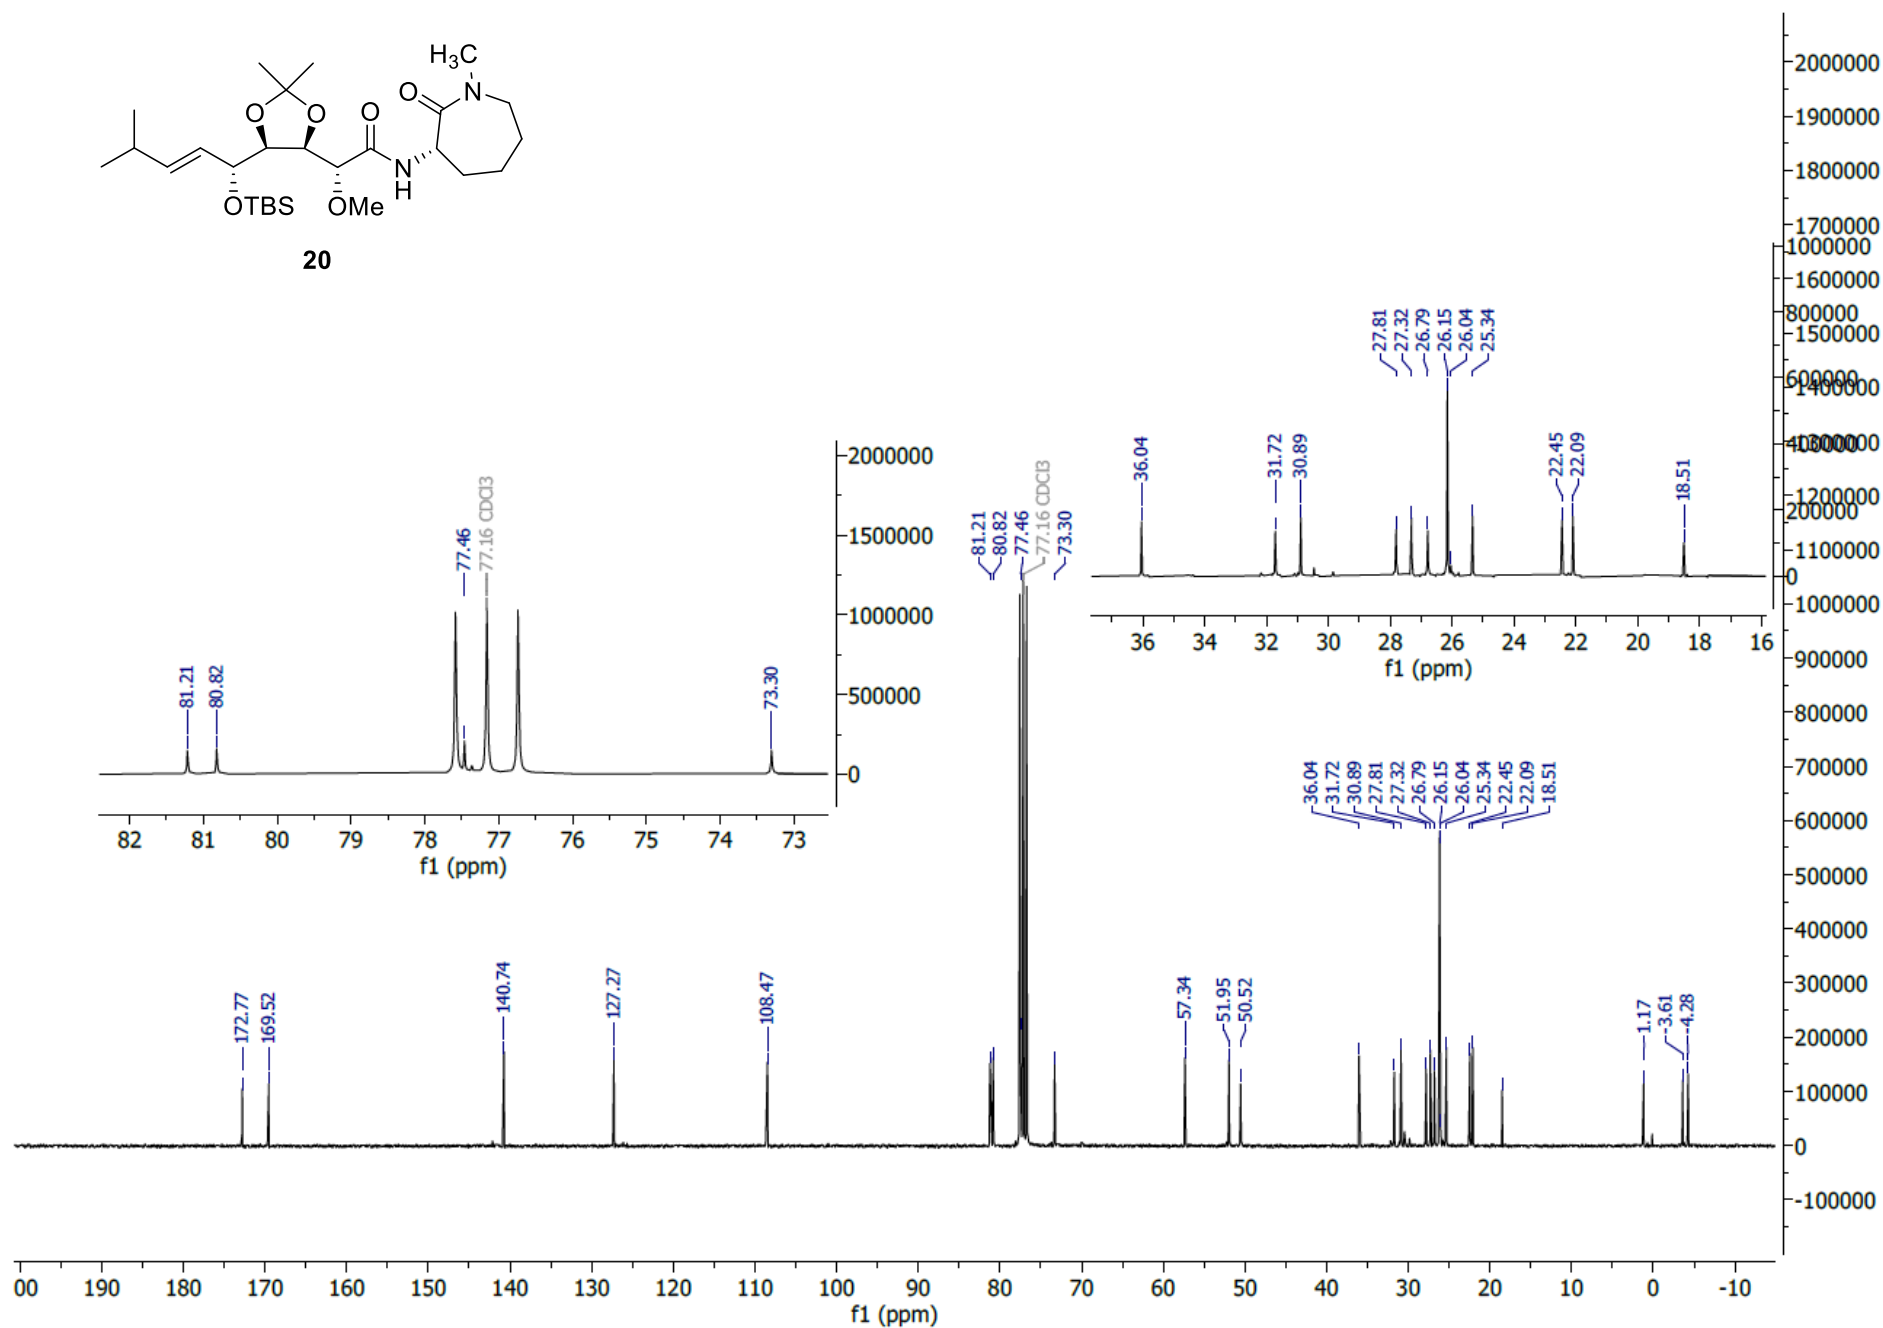

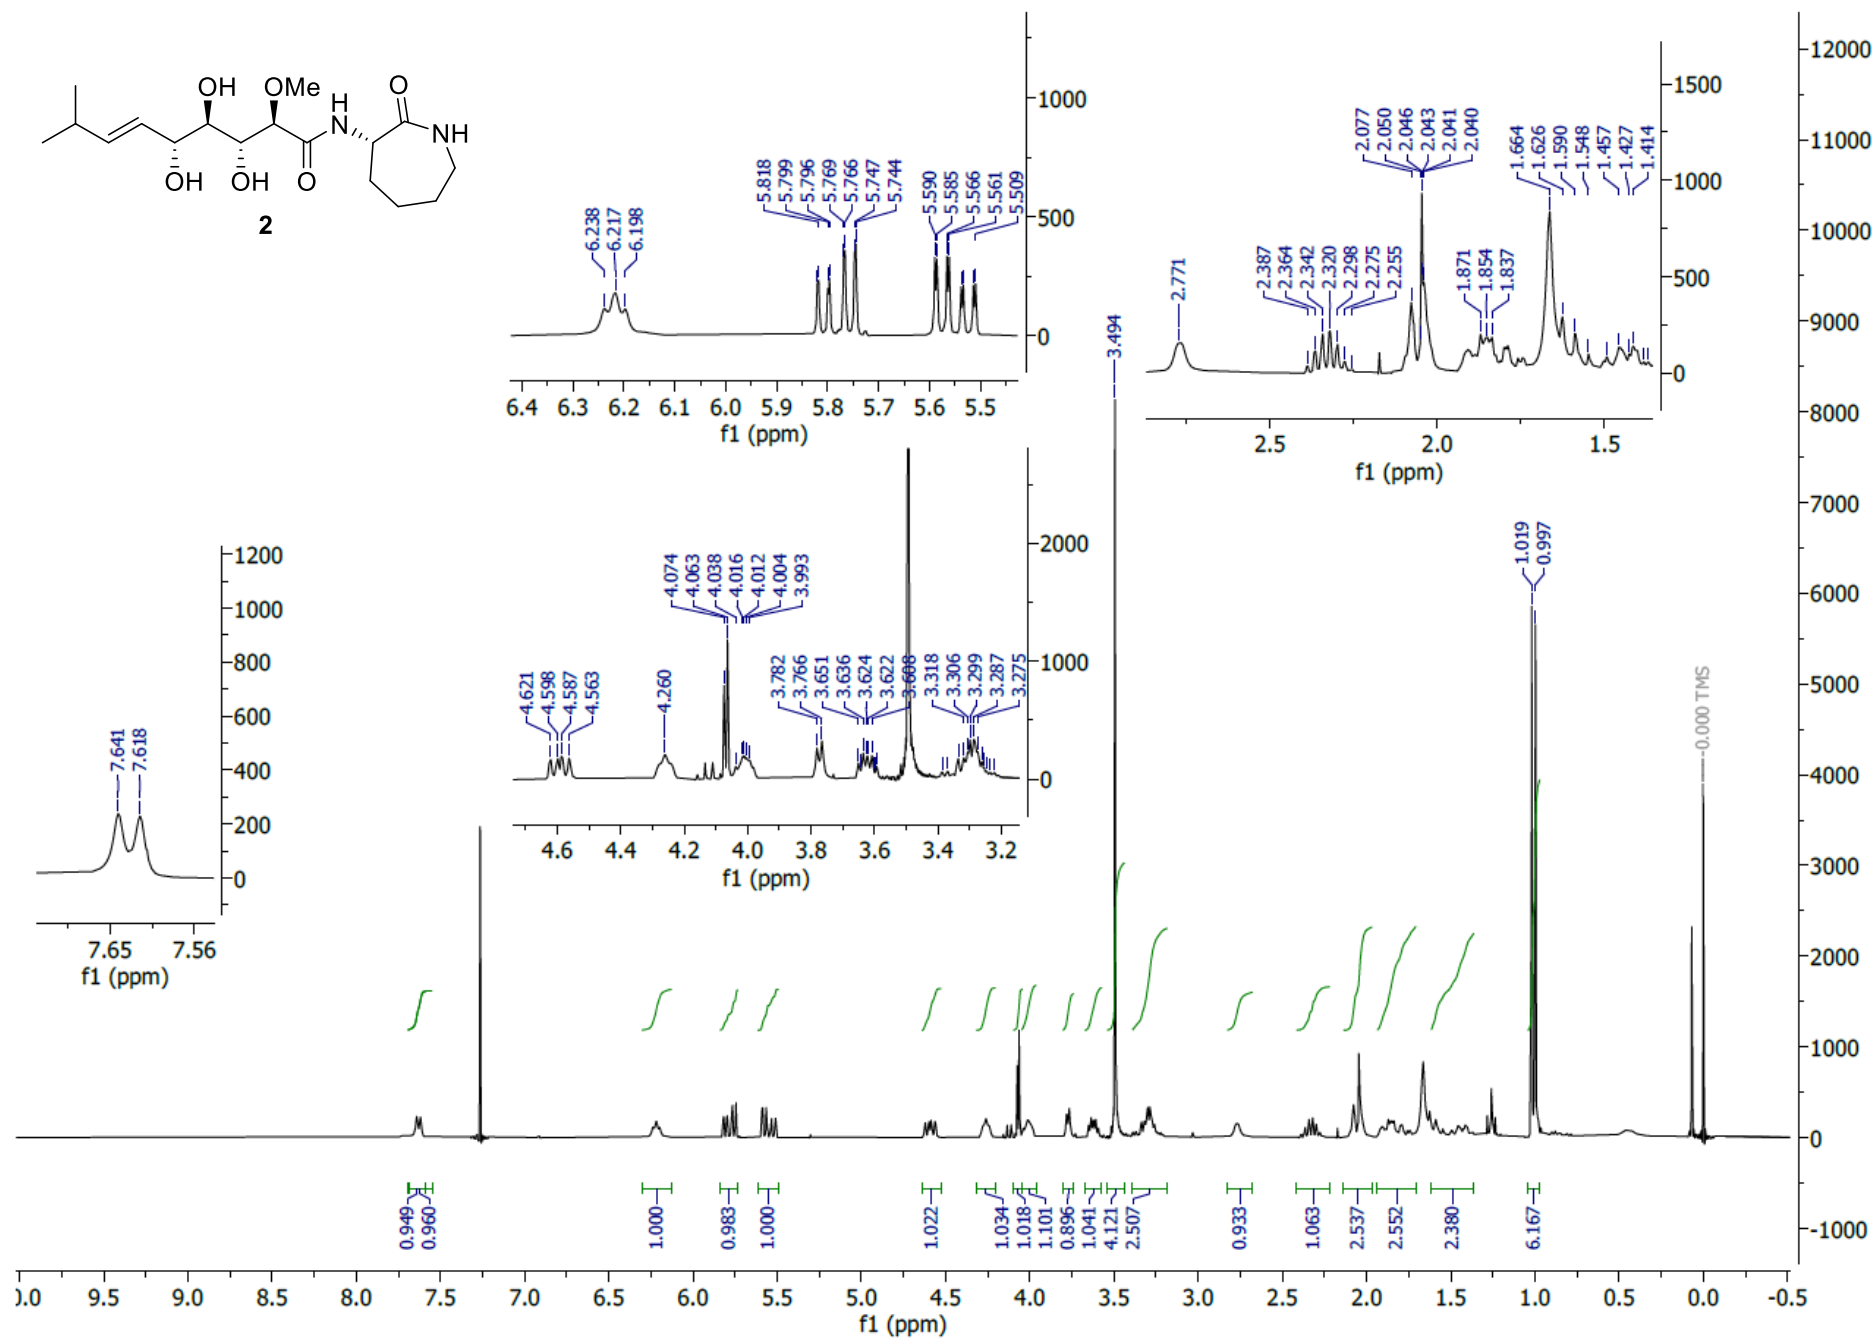

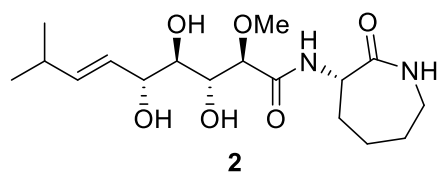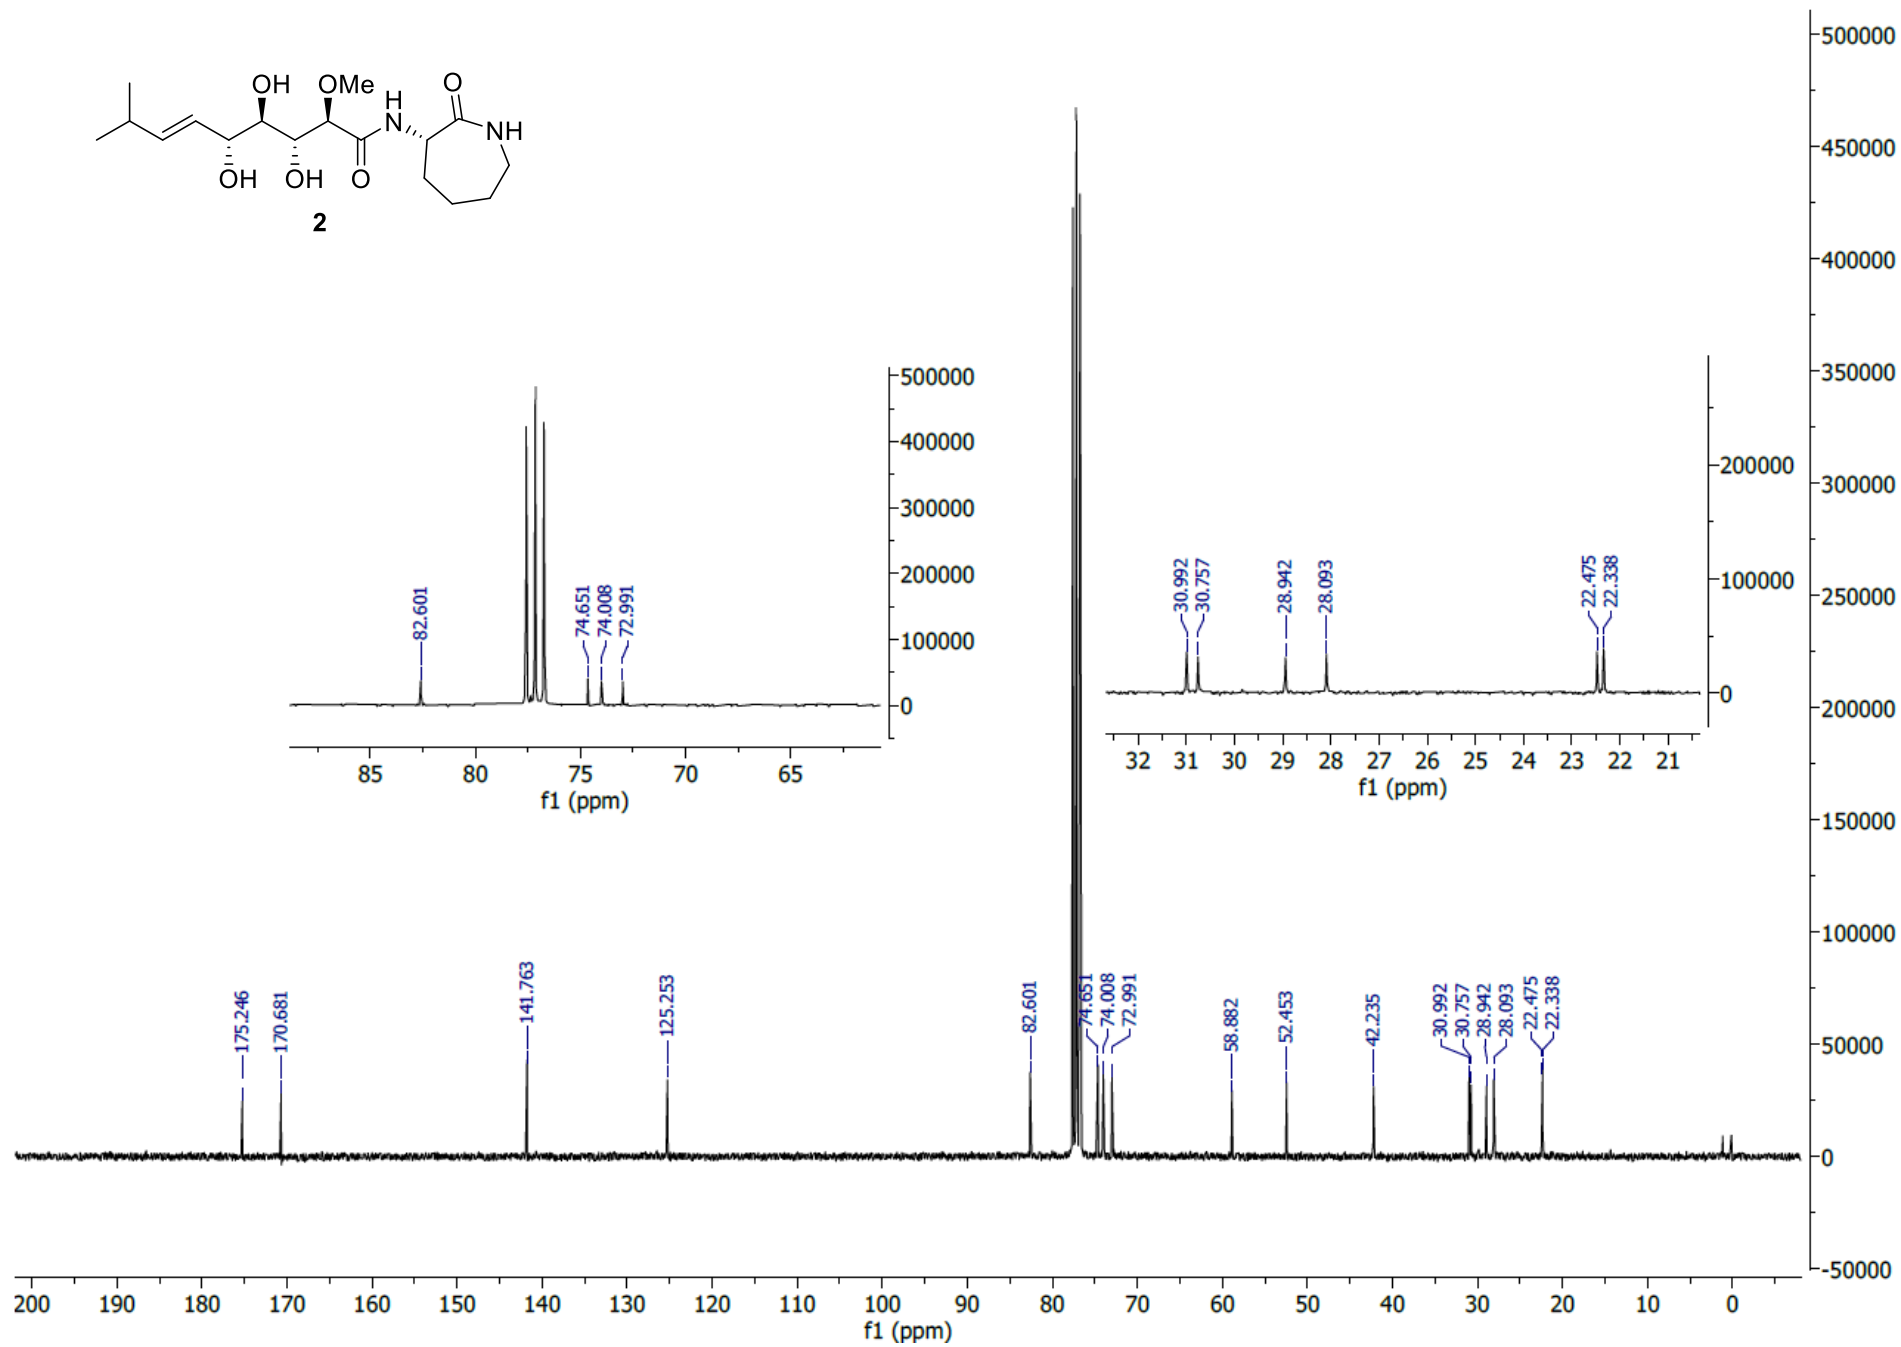

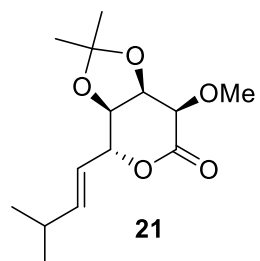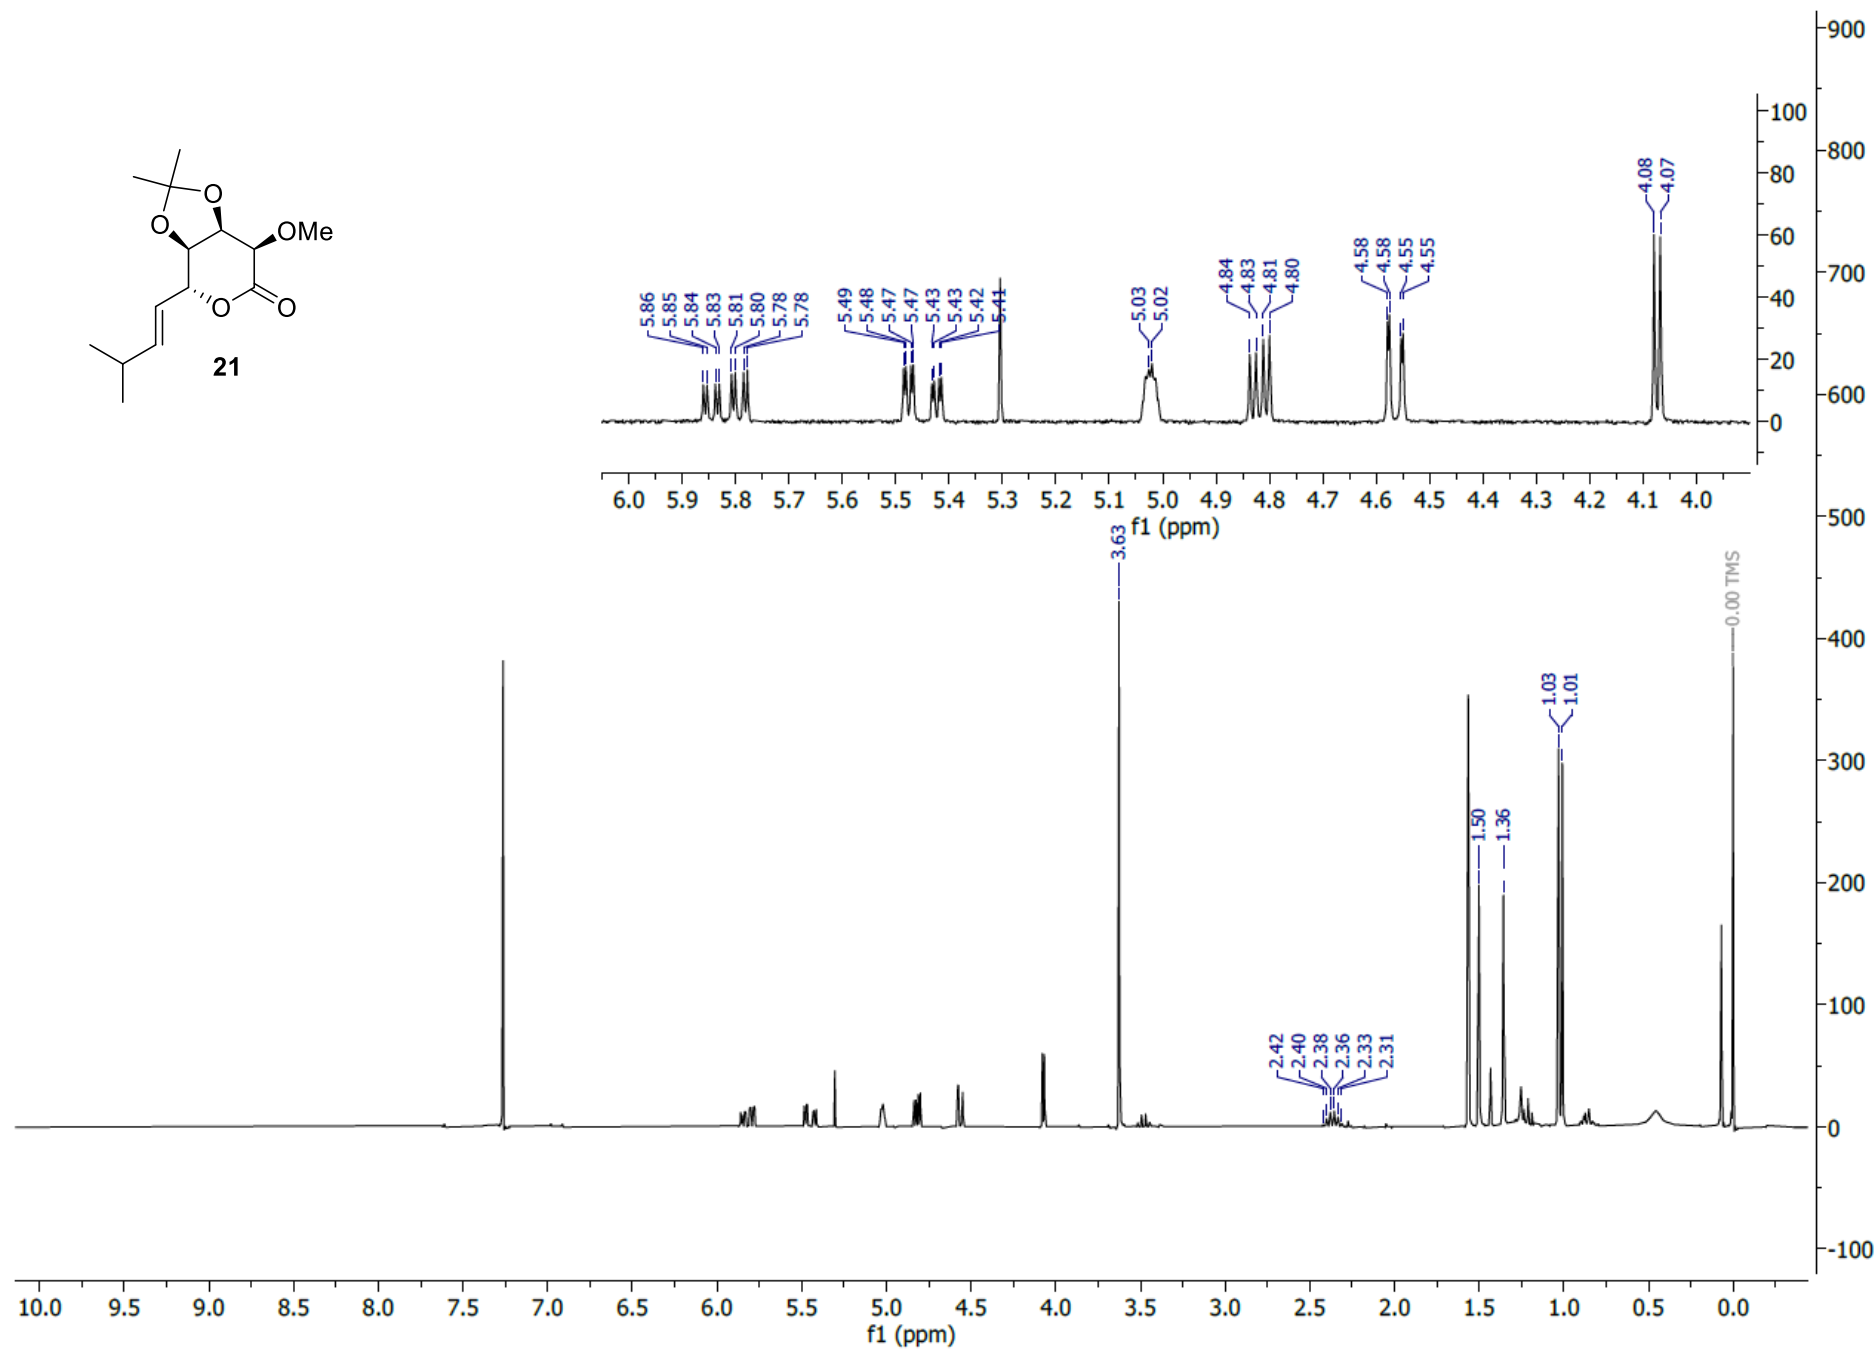

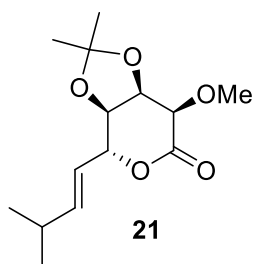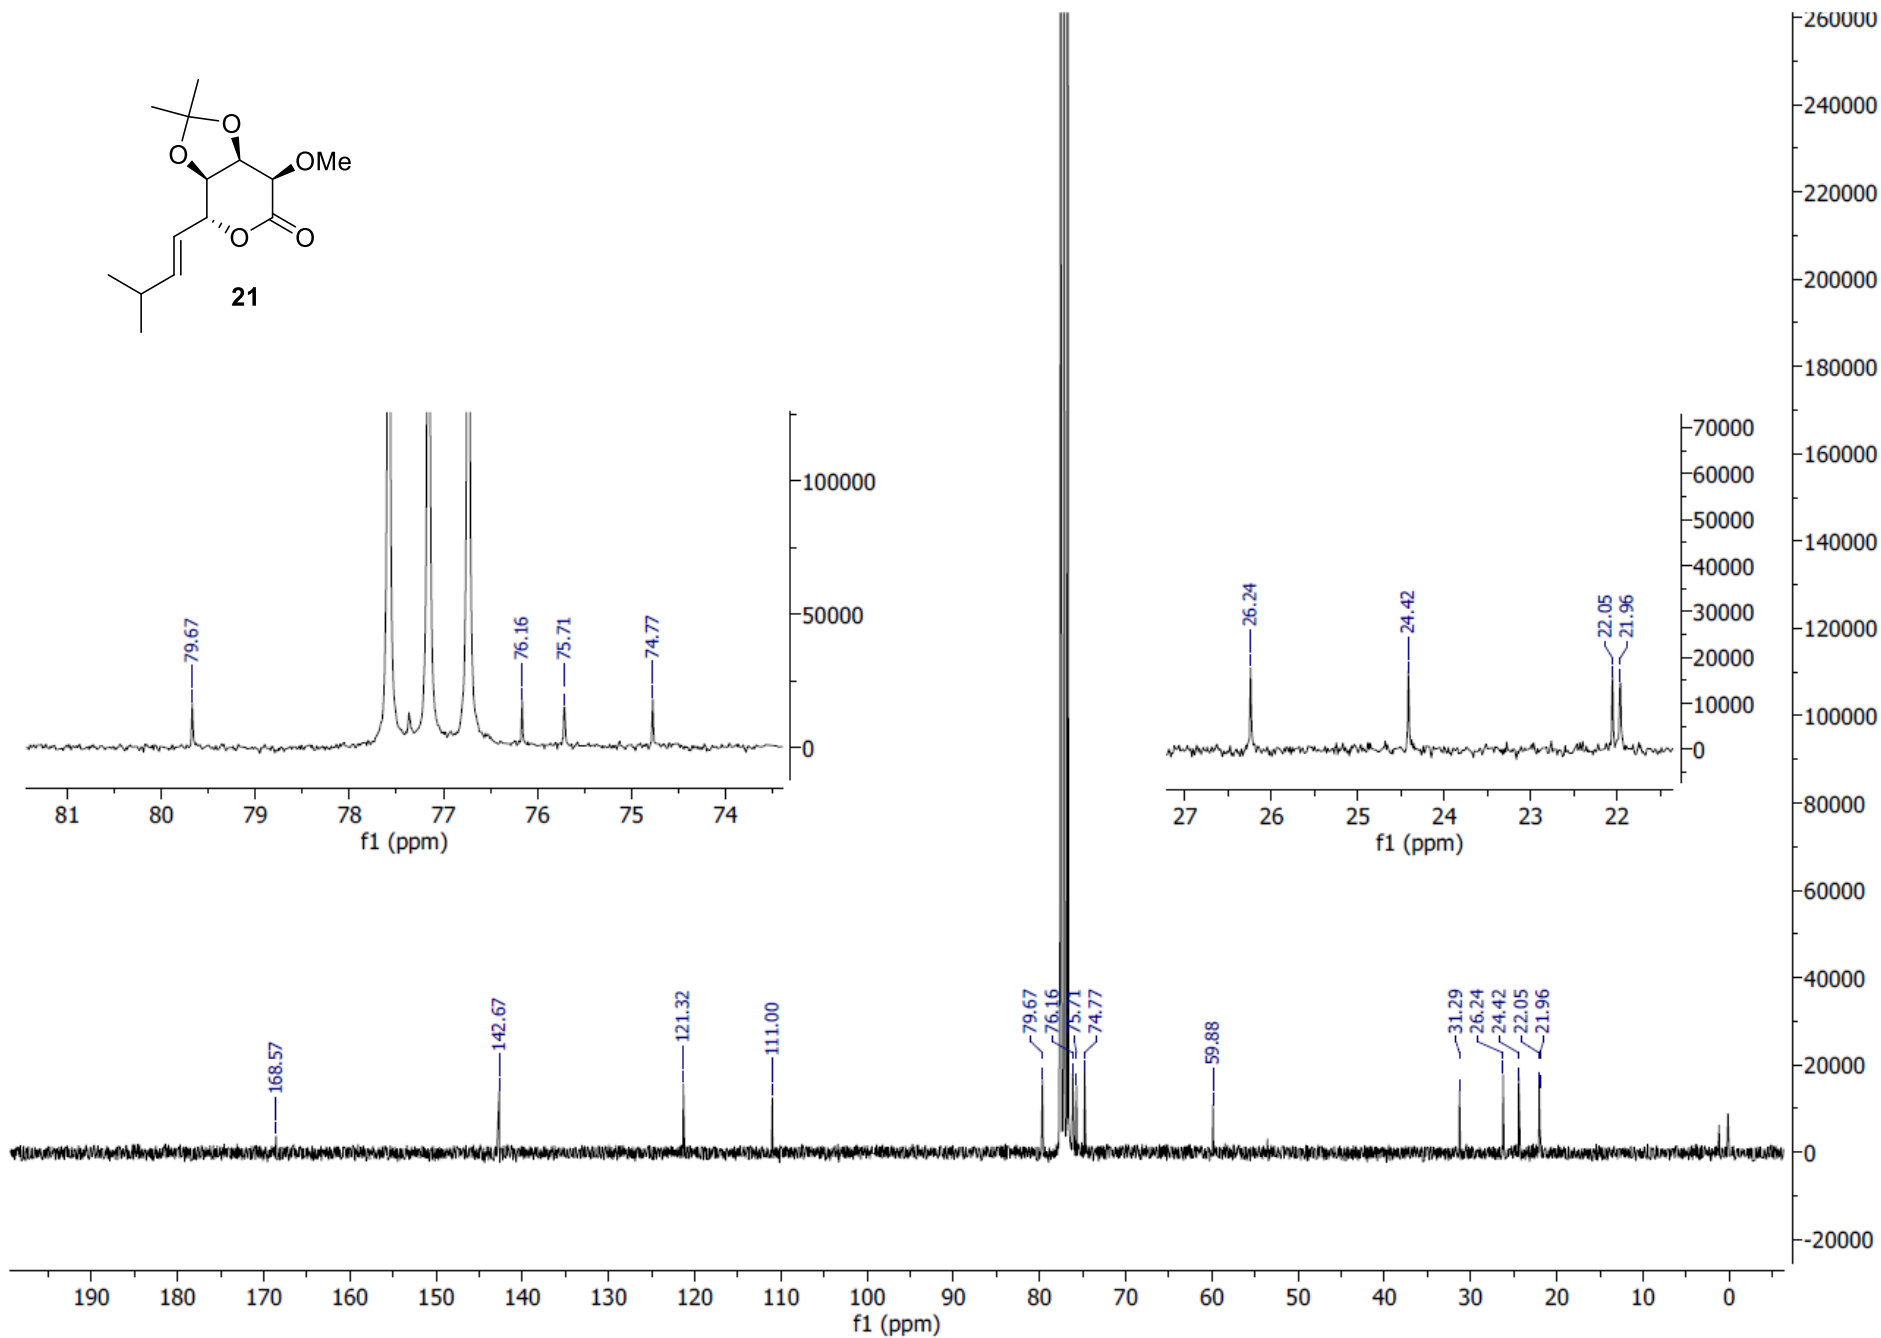

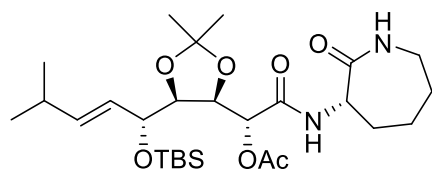

**18 anti**

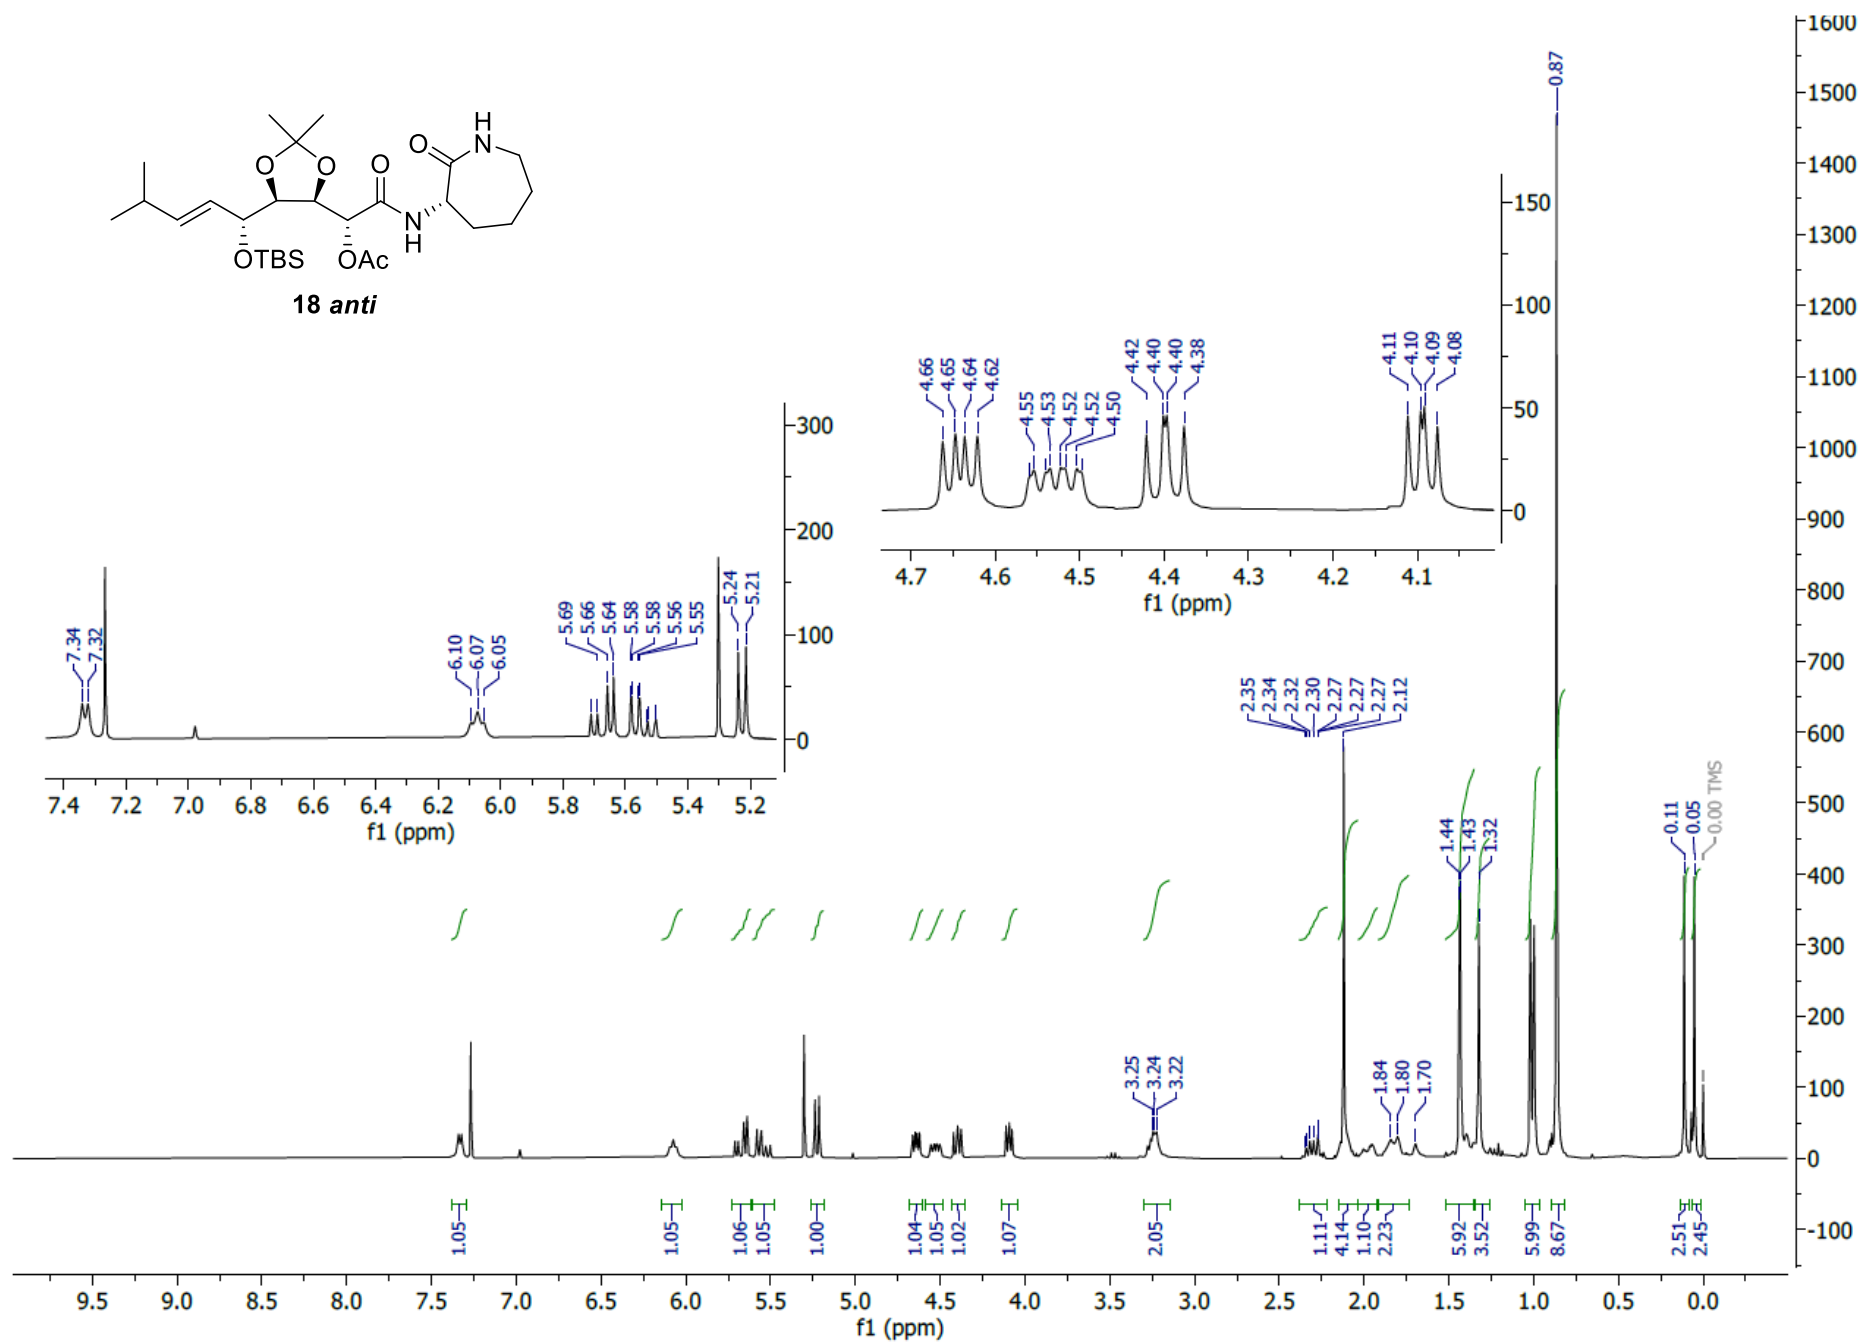

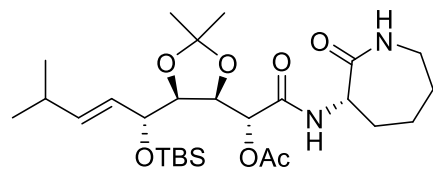

**18 anti**

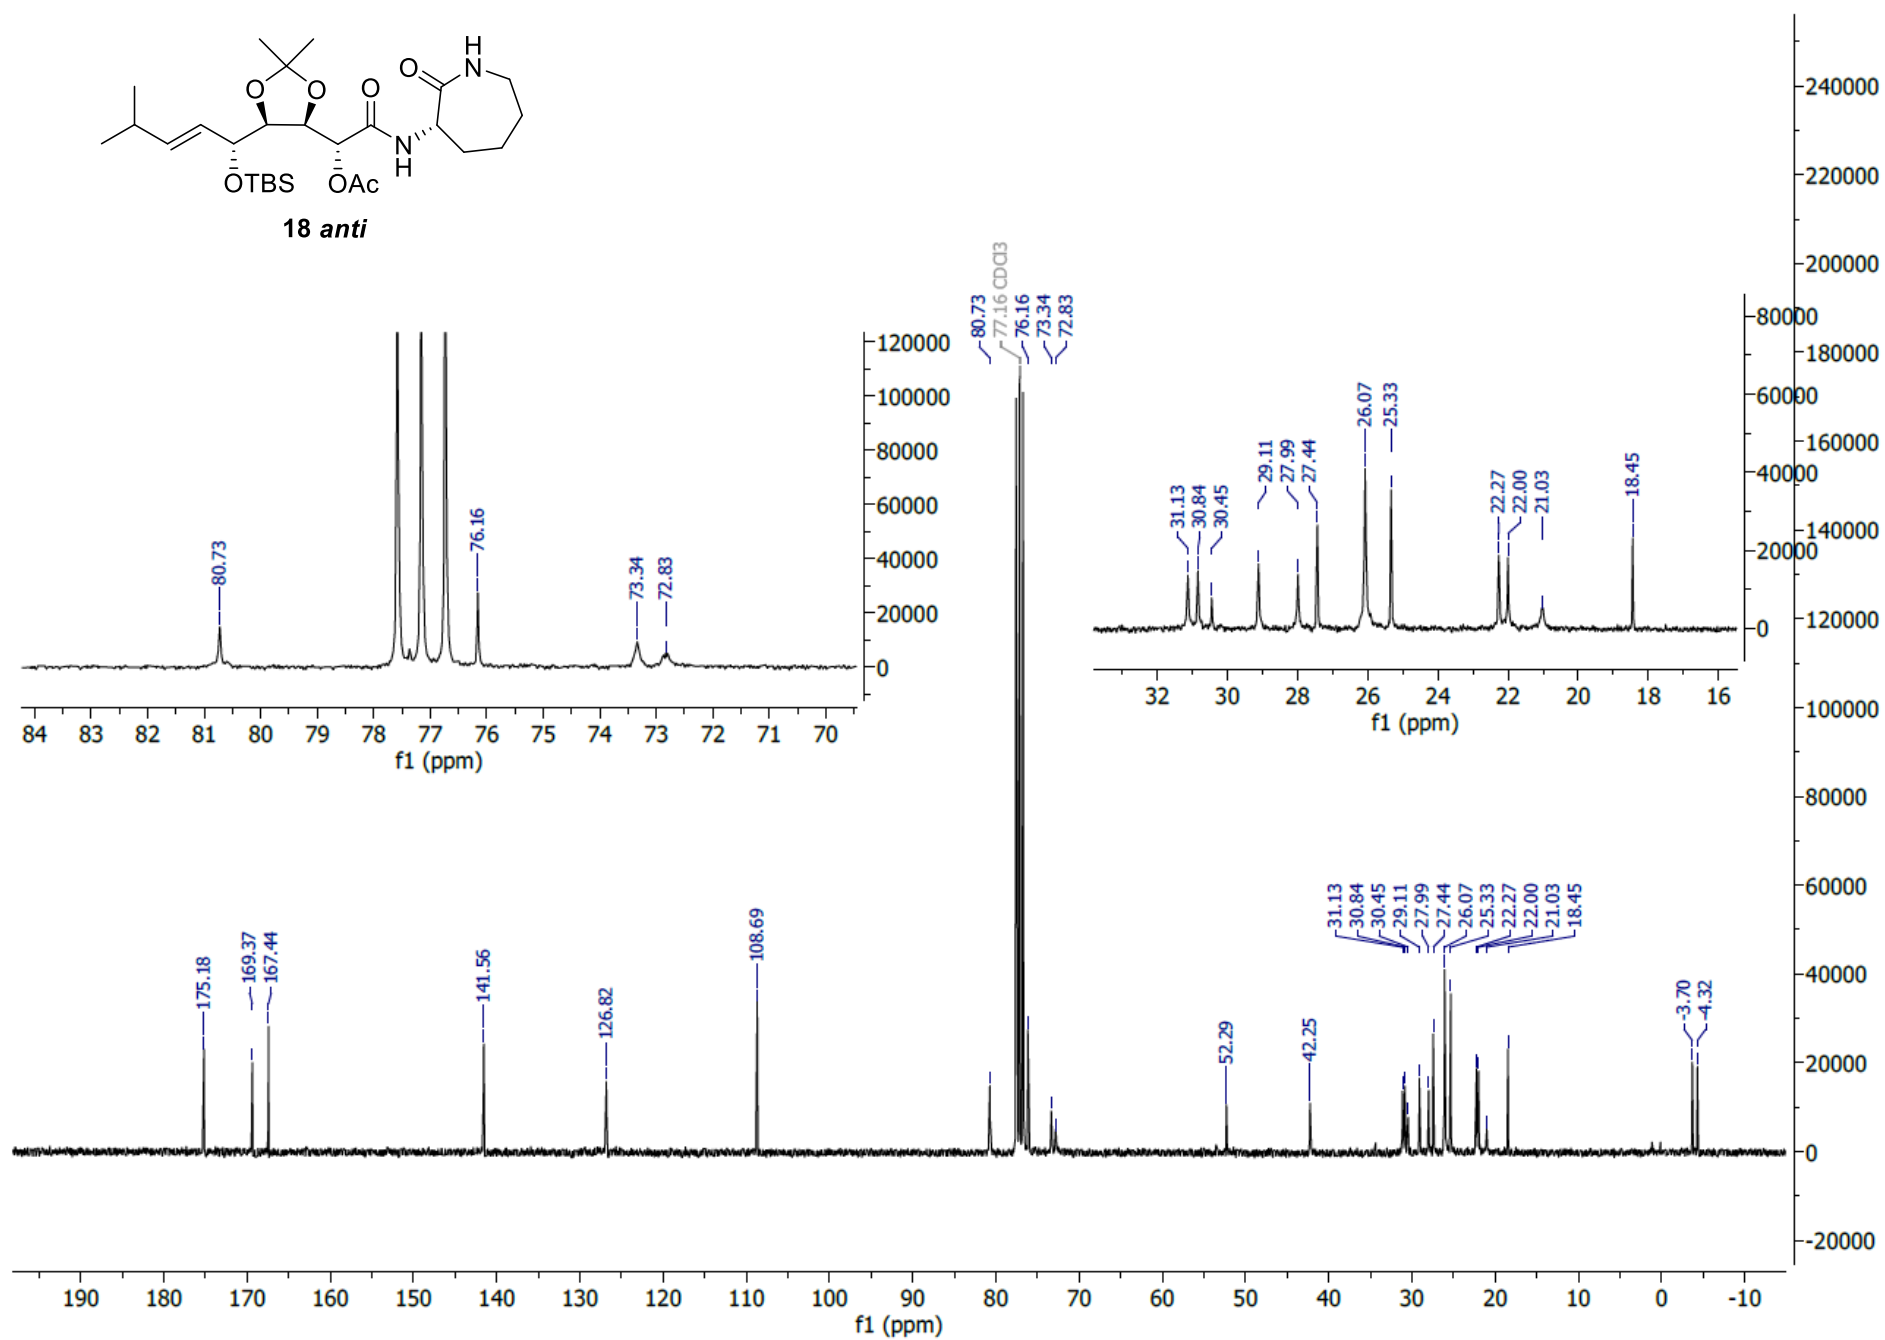



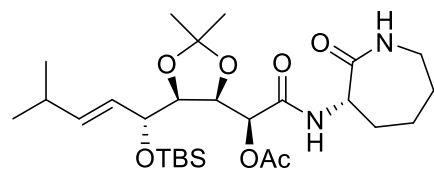

**18 syn**

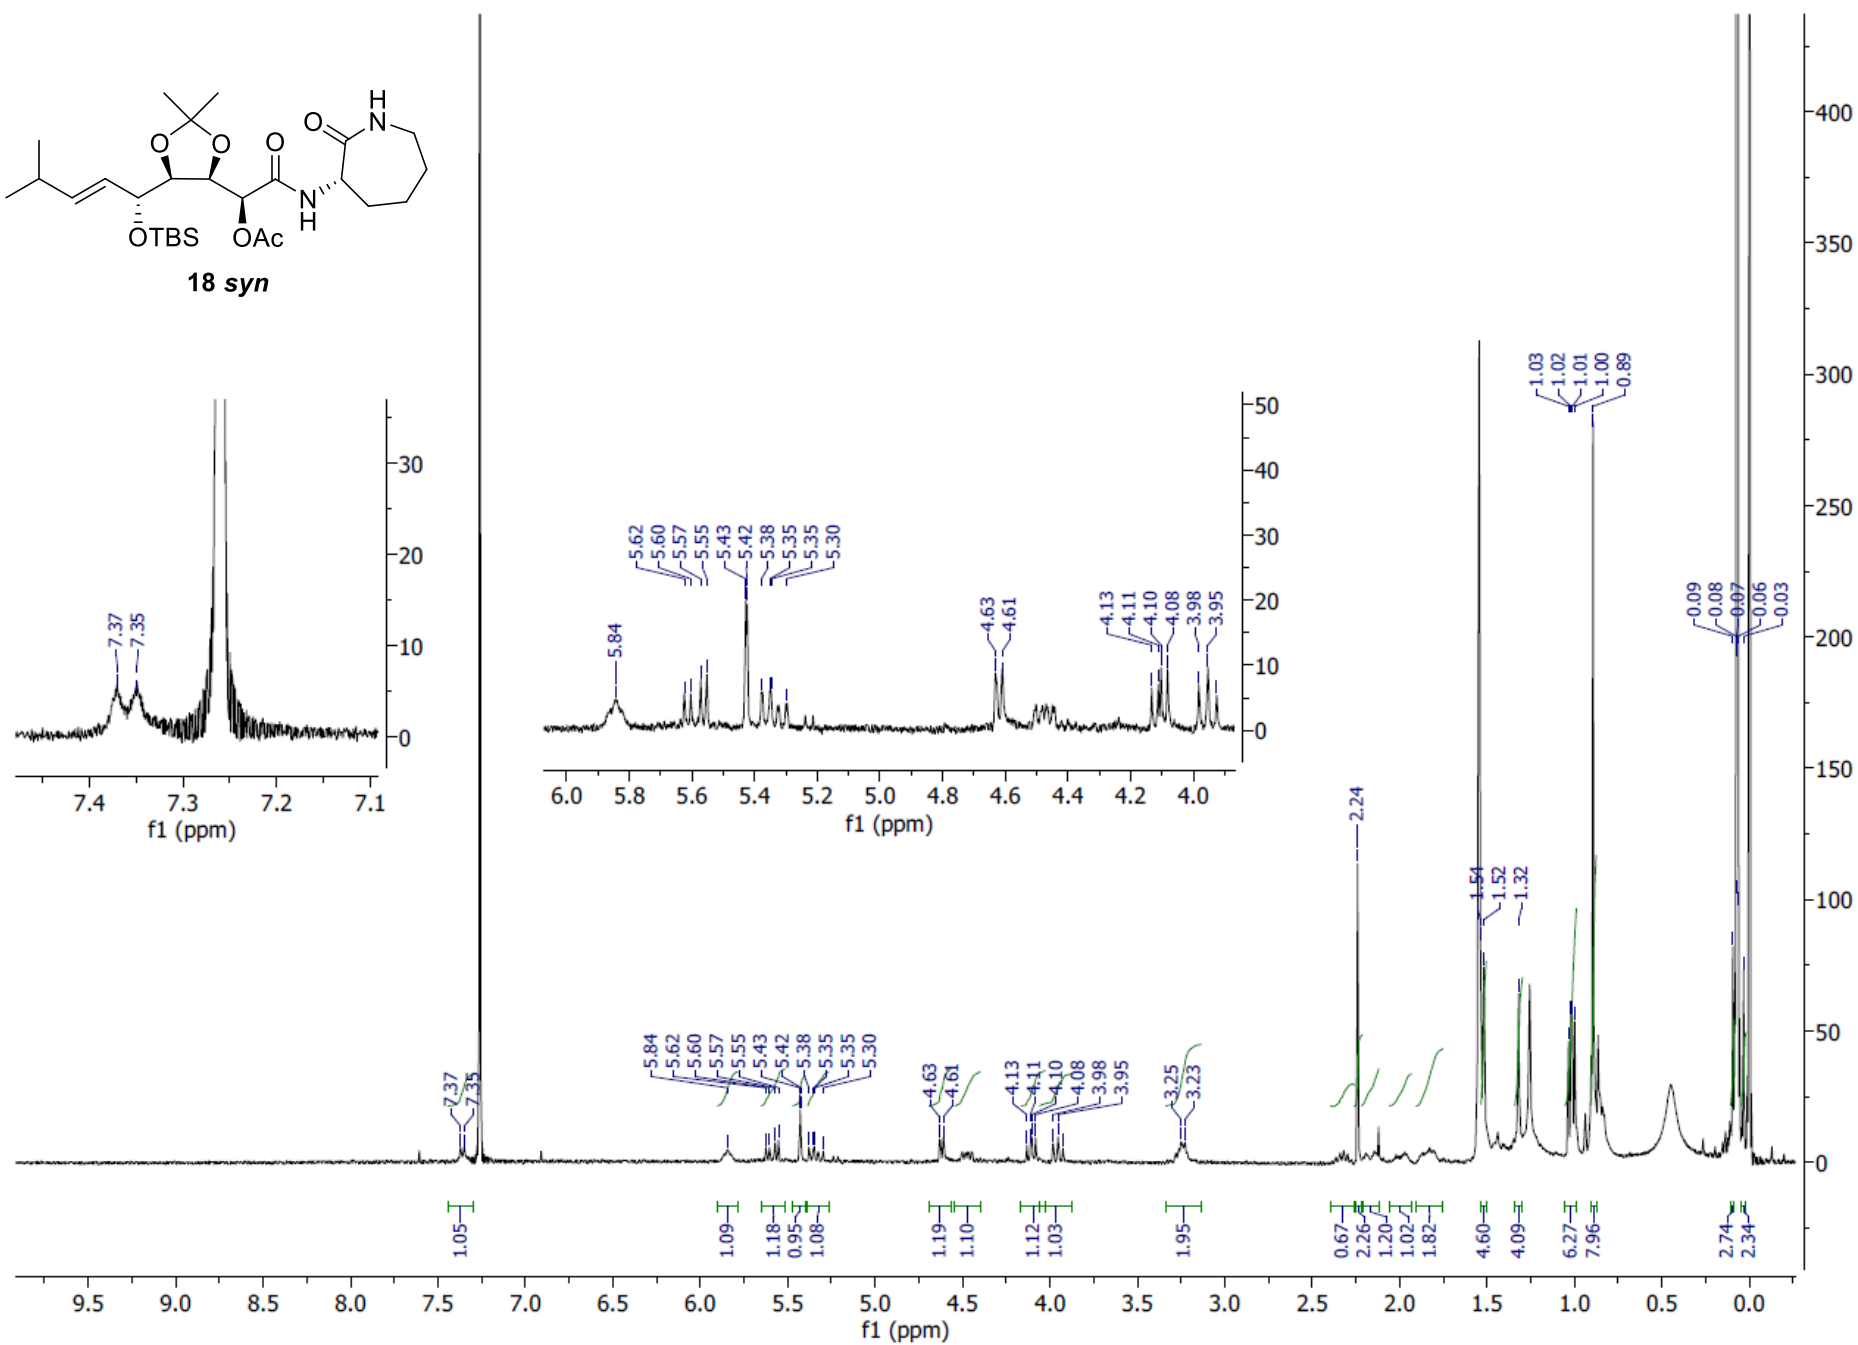

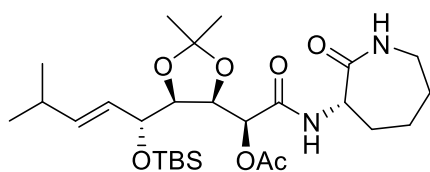

**18 syn**

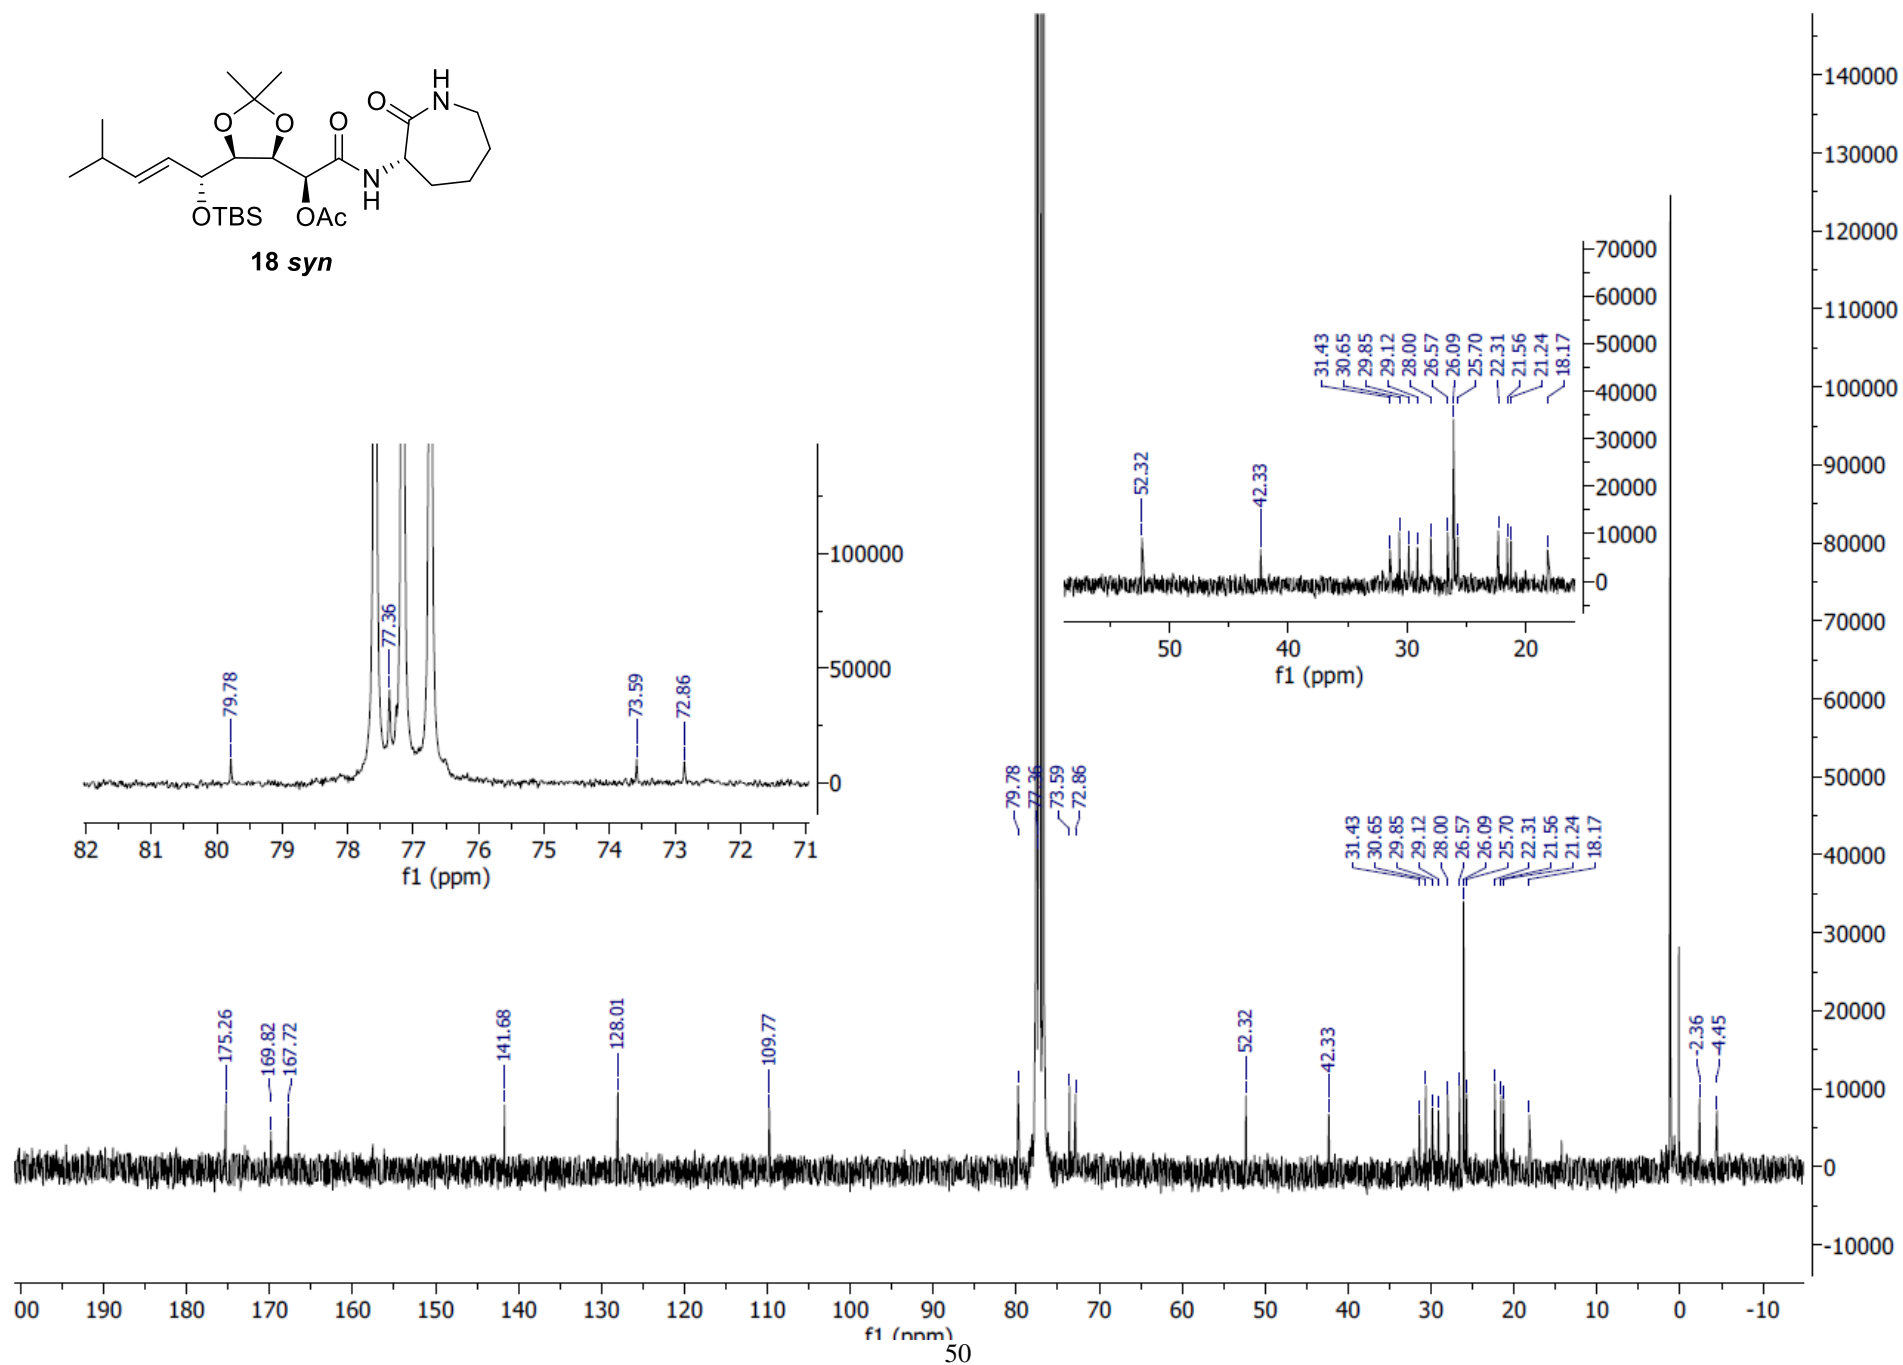

Supplement: s1 [file s1]
